# Supplementary material
Source: publisher figshare collection journal article supplement (https://acs.figshare.com/ndownloader/files/31700804)

## Supporting Information

# **Construction of Stable Metal-Organic Framework Platforms Embedding *N*-Heterocyclic Carbene Metal Complexes for Selective Catalysis**

Hyunyong Kim,<sup>†,‡</sup> Hyunseok Kim,<sup>‡</sup> Kimoon Kim,<sup>\*,†,‡,#</sup> and Eunsung Lee<sup>\*,†,‡,#</sup>

E-mail: eslee@postech.ac.kr, kkim@postech.ac.kr

<sup>†</sup>Center for Self-assembly and Complexity, Institute for Basic Science (IBS), Pohang, 790–784, Republic of Korea

<sup>‡</sup>Department of Chemistry, Pohang University of Science and Technology, Pohang, 790–784, Republic of Korea

<sup>#</sup>Division of Advanced Materials Science, Pohang University of Science and Technology, Pohang, 790–784, Republic of Korea

## Table of Contents

|                                                                                |         |
|--------------------------------------------------------------------------------|---------|
| 1. Experimental procedures for ligand synthesis-----                           | S3-S7   |
| 2. Experimental procedures for construction of MOFs -----                      | S7-S8   |
| 3. Crystal structures of Cu-NHC MOF and Au-NHC MOF-----                        | S9      |
| 4. Analysis of Digested Solution of Cu-NHC MOFs and Au-NHC MOF by ICP-OES----- | S10     |
| 5. Nitrogen sorption isotherms of MOFs -----                                   | S11     |
| 6. Recycle experiments and ICP spectroscopic evaluations -----                 | S12-S18 |
| 7. Experimental details of catalyzed reactions -----                           | S19-S30 |
| 8. Single crystal X-ray structure determination-----                           | S31-S34 |
| 9. $^1\text{H}$ and $^{13}\text{C}$ NMR spectra-----                           | S35-S77 |

## Materials

Without additional notes, all reagents were commercially available and used without further purification. DCM was distilled over  $\text{CaH}_2$ , and THF was distilled over sodium and benzophenone. DMF were purified by solvent purification system using alumina column. *N*-methyl-2-pyrrolidone (NMP), *p*-xylene and methanol were purchased from Sigma-Aldrich, and directly used without further purification.

1,3-bis(2,6-diisopropylphenyl)-2,3-dihydro-1H-imidazol-2-yl) copper(I) chloride (IPrCuCl), 1,3-bis(2,6-diisopropylphenyl)-2,3-dihydro-1H-imidazol-2-yl) copper(I) bromide (IPrCuBr), 1,3-bis(2,6-diisopropylphenyl)-2,3-dihydro-1H-imidazol-2-yl) copper(I) iodide (IPrCuI), and 1,3-bis(2,6-diisopropylphenyl)-2,3-dihydro-1H-imidazol-2-yl) gold(I) chloride (IPrAuCl) were synthesized as reported previously.<sup>1,2</sup>

## Experimental procedures for ligand synthesis

### 1,3-bis(4'-carboxy-3,5-diisopropyl-[1,1'-biphenyl]-4-yl)-2,3-dihydro-1H-imidazol-2-yl copper(I) chloride (NHC-CuCl)

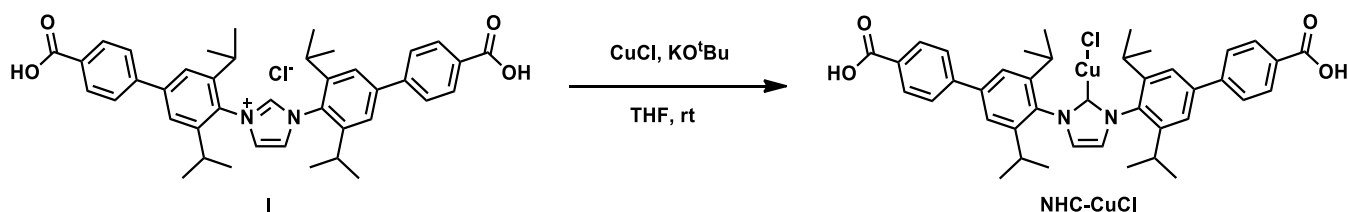

Precursor **I** was prepared by the method from the previous literature.<sup>3</sup> A flask was charged with Precursor **I** (100 mg, 0.15 mmol), potassium tert-butoxide (60.7 mg, 0.54 mmol) and copper(I) chloride (22.3 mg, 0.23 mmol). To this flask, dry tetrahydrofuran (THF) was added and the reaction mixture was stirred for 48 h under a nitrogen atmosphere. The mixture was filtered through Celite. The filtrate was evaporated and acidified with 1 N HCl. The crude material was washed with water and recrystallized from methanol to give 54 mg of **NHC-CuCl** (48% yield).  $^1\text{H}$  NMR (400 MHz,  $\text{CD}_3\text{OD}$ ):  $\delta$  8.07-8.05 (d, 4H), 7.69-7.66 (m, 6H), 7.62 (s, 4H), 2.75-2.67 (sept, 4H), 1.40-1.37 (d, 12H), 1.35-1.33 (d, 12H);  $^{13}\text{C}$  NMR (100 MHz,  $\text{CD}_3\text{OD}$ ):  $\delta$  175.10, 147.61, 144.36, 143.56, 138.69, 135.54, 130.98, 127.59, 125.63, 124.09, 30.22, 25.14, 24.16; Anal. Calcd. for  $\text{C}_{41}\text{H}_{44}\text{N}_2\text{O}_4\text{CuCl}$ : C, 67.66; H, 6.09; N, 3.85. Found: C, 67.59; H, 5.91; N, 3.90.

### 1,3-bis(4'-carboxy-3,5-diisopropyl-[1,1'-biphenyl]-4-yl)-2,3-dihydro-1H-imidazol-2-yl copper(I) bromide (NHC-CuBr)

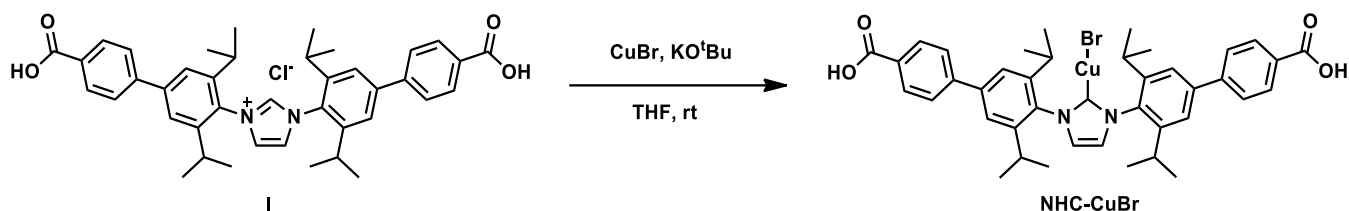

A flask was charged with precursor **I** (100 mg, 0.15 mmol), potassium tert-butoxide (60.7 mg, 0.54 mmol) and copper(I) bromide (32.3 mg, 0.23 mmol). To this flask, dry tetrahydrofuran (THF) was added and the reaction mixture was stirred for 48 h under a nitrogen atmosphere. The mixture was filtered through Celite. The filtrate was evaporated and acidified with 1 N HCl. The crude material was washed with water and recrystallized from methanol to give 62 mg of **NHC-CuBr** (53% yield).  $^1\text{H}$  NMR (400 MHz,  $\text{CD}_3\text{OD}$ ):  $\delta$  8.08-8.06 (d, 4H), 7.70-7.65 (m, 6H), 7.62 (s, 4H), 2.75-2.68 (sept, 4H), 1.39-1.37 (d, 12H), 1.35-1.33 (d, 12H);  $^{13}\text{C}$  NMR (100 MHz,  $\text{CD}_3\text{OD}$ ):  $\delta$  175.13, 147.59, 144.30, 143.61, 138.63, 135.47, 130.96, 127.63, 125.56, 124.05, 30.18, 25.17, 24.17; Anal. Calcd. for  $\text{C}_{41}\text{H}_{44}\text{N}_2\text{O}_4\text{CuBr}$ : C, 63.77; H, 5.74; N, 3.63. Found: C, 63.87; H, 5.56; N, 3.30.

**1,3-bis(4'-carboxy-3,5-diisopropyl-[1,1'-biphenyl]-4-yl)-2,3-dihydro-1H-imidazol-2-yl copper(I) iodide (NHC-CuI)**

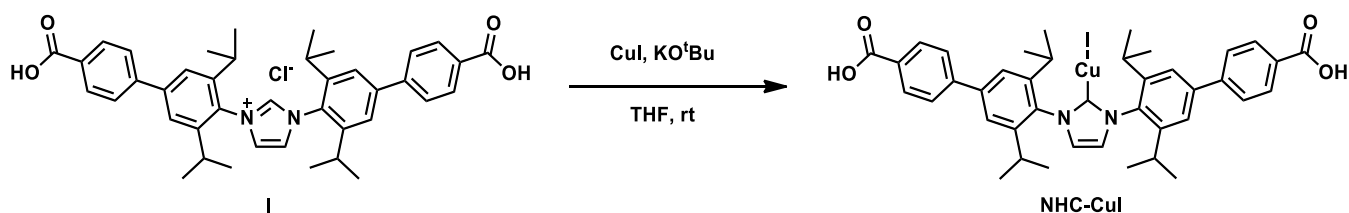

A flask was charged with precursor **I** (100 mg, 0.15 mmol), potassium tert-butoxide (60.7 mg, 0.54 mmol) and copper(I) iodide (42.9 mg, 0.23 mmol). To this flask, dry tetrahydrofuran (THF) was added and the reaction mixture was stirred for 48 h under a nitrogen atmosphere. The mixture was filtered through Celite. The filtrate was evaporated and acidified with 1 N HCl. The crude material was washed with water and recrystallized from methanol to give 58 mg of **NHC-CuI** (47% yield).  $^1\text{H}$  NMR (400 MHz,  $\text{CD}_3\text{OD}$ ):  $\delta$  8.08-8.06 (d, 4H), 7.65-7.62 (m, 6H), 7.62 (s, 4H), 2.75-2.69 (sept, 4H), 1.40-1.38 (d, 12H), 1.35-1.33 (d, 12H);  $^{13}\text{C}$  NMR (100 MHz,  $\text{CD}_3\text{OD}$ ):  $\delta$  175.15, 147.57, 144.30, 143.64, 138.61, 135.40, 130.96, 127.64, 125.43, 124.03, 30.18, 25.23, 24.19; Anal. Calcd. for  $\text{C}_{41}\text{H}_{44}\text{N}_2\text{O}_4\text{CuI}$ : C, 60.11; H, 5.41; N, 3.42. Found: C, 60.03; H, 5.53; N, 3.32.

**1,3-bis(4'-carboxy-3,5-diisopropyl-[1,1'-biphenyl]-4-yl)-2,3-dihydro-1H-imidazol-2-yl gold(I) chloride (NHC-AuCl)**



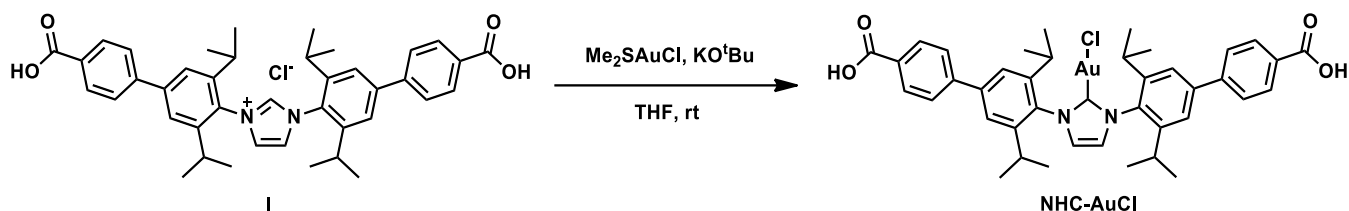

A flask was charged with precursor **I** (100 mg, 0.15 mmol), potassium tert-butoxide (60.7 mg, 0.54 mmol) and dimethylsulfide gold(I) chloride (66.4 mg, 0.23 mmol). To this flask, dry tetrahydrofuran (THF) was added and the reaction mixture was stirred for 48 h under a nitrogen atmosphere. The mixture was filtered through Celite. The filtrate was evaporated and acidified with 1 N HCl. The crude material was washed with water and recrystallized from methanol to give 67 mg of **NHC-AuCl** (52% yield).  $^1\text{H}$  NMR (400 MHz,  $\text{CD}_3\text{OD}$ ):  $\delta$  8.08-8.06 (d, 4H), 7.74-7.68 (m, 6H), 7.62 (s, 4H), 2.74-2.70 (sept, 4H), 1.44-1.42 (d, 12H), 1.34-1.33 (d, 12H);  $^{13}\text{C}$  NMR (100 MHz,  $\text{CD}_3\text{OD}$ ):  $\delta$  175.11, 147.60, 144.52, 143.58, 138.66, 135.08, 130.98, 127.63, 125.61, 124.15, 30.28, 24.76, 24.33; Anal. Calcd. for  $\text{C}_{41}\text{H}_{44}\text{N}_2\text{O}_4\text{AuCl}$ : C, 57.18; H, 5.15; N, 3.25. Found: C, 57.10; H, 5.27; N, 3.18.

**(1,3-bis(4'-carboxy-3,5-diisopropyl-[1,1'-biphenyl]-4-yl)-2,3-dihydro-1H-imidazol-2-yl)silver(I) chloride**

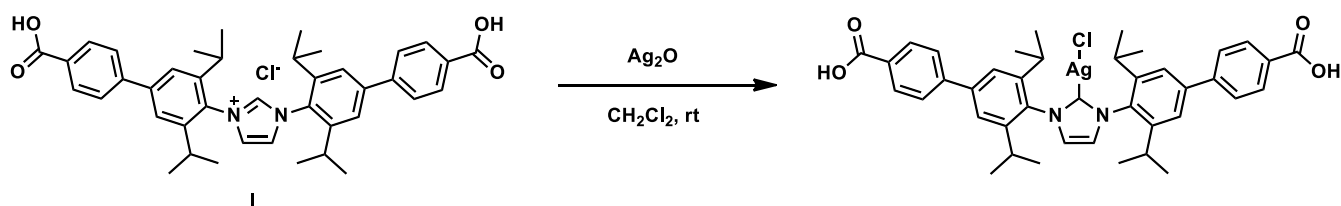

A flask was charged with precursor **I** (50 mg, 0.075 mmol) and silver oxide (10 mg, 0.045 mmol). To this flask, dry tetrahydrofuran (THF) was added and the reaction mixture was stirred for 48 h under a nitrogen atmosphere. The mixture was filtered through Celite. The crude material was washed with water and recrystallized from methanol to give 30 mg of desired complex (52% yield).  $^1\text{H}$  NMR (400 MHz,  $\text{CD}_3\text{OD}$ ):  $\delta$  8.35 (s, 2H), 8.10-8.08 (d, 4H), 7.75 (s, 4H), 7.72-7.69 (d, 4H), 2.56 (sept, 4H), 1.43-1.41 (d, 12H), 1.36-1.34 (d, 12H);  $^{13}\text{C}$  NMR (100 MHz,  $\text{CD}_3\text{OD}$ ):  $\delta$  174.79, 147.10, 146.14, 142.69, 139.09, 131.06, 130.81, 127.70, 124.63, 30.66, 24.76, 23.87.

**Allyl(1,3-bis(4'-carboxy-3,5-diisopropyl-[1,1'-biphenyl]-4-yl)-2,3-dihydro-1H-imidazol-2-yl)Chloropalladium(II)**

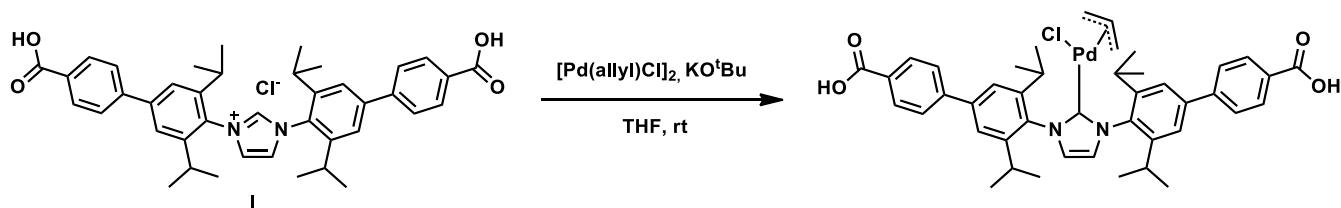

A flask was charged with precursor **I** (50 mg, 0.075 mmol), potassium tert-butoxide (60.7 mg, 0.27 mmol) and Allylpalladium(II) chloride dimer (17 mg, 0.045 mmol). To this flask, dry tetrahydrofuran (THF) was added and the reaction mixture was stirred for 48 h under a nitrogen atmosphere. The mixture was filtered through Celite. The filtrate was evaporated and acidified with 1 N HCl. The crude material was washed with water and recrystallized from methanol to give 33 mg of desired complex (53% yield). <sup>1</sup>H NMR (400 MHz, CD<sub>3</sub>OD): δ 8.09-8.06 (d, 4H), 7.69-7.66 (d, 4H), 7.63 (s, 2H), 7.59 (s, 4H), 3.86-3.83 (d, 1H), 3.28-3.26 (m, 1H), 3.21-3.17 (m, 2H), 2.98-2.91 (m, 2H), 2.84-2.81 (d, 1H), 1.83-1.80 (d, 1H), 1.50-1.43 (dd, 12H), 1.31-1.28 (d, 6H), 1.22-1.20 (d, 6H); <sup>13</sup>C NMR (100 MHz, CD<sub>3</sub>OD): δ 175.20, 147.94, 143.82, 143.65, 138.49, 136.85, 130.93, 127.70, 127.50, 126.52, 123.74, 116.06, 73.59, 30.03, 26.74, 26.12, 24.76, 23.35, 23.23.

### [(IPr)(CO<sub>2</sub>H)<sub>2</sub>IrCl(COD)]

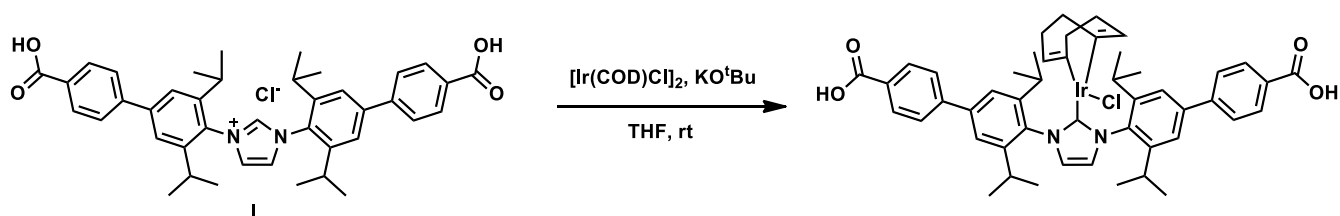

A flask was charged with precursor **I** (50 mg, 0.075 mmol), potassium tert-butoxide (60.7 mg, 0.27 mmol) and Bis(1,5-cyclooctadiene)diiridium(I) dichloride (30 mg, 0.045 mmol). To this flask, dry tetrahydrofuran (THF) was added and the reaction mixture was stirred for 48 h under a nitrogen atmosphere. The mixture was filtered through Celite. The filtrate was evaporated and acidified with 1 N HCl. The crude material was washed with water and recrystallized from methanol to give 33 mg of desired complex (45% yield). <sup>1</sup>H NMR (400 MHz, CD<sub>3</sub>OD): δ 8.09-8.06 (d, 4H), 7.71-7.68 (d, 4H), 7.60 (s, 4H), 7.46 (s, 2H), 4.15-4.12 (m, 2H), 3.49-4.42 (m, 2H), 3.13-3.11 (m, 2H), 2.78 (br, 2H), 1.79-1.70 (m, 2H), 1.64-1.59 (m, 2H), 1.50-1.42 (m, 12H), 1.40-1.24 (m, 7H), 1.21-1.20 (d, 12H); <sup>13</sup>C NMR (100 MHz, CD<sub>3</sub>OD): δ 175.24, 144.01, 143.55, 138.41, 137.17, 130.95, 127.49, 126.64, 83.41, 53.33, 34.41, 30.33, 29.62, 26.74, 24.76, 23.88.

### [(IPr)(CO<sub>2</sub>H)<sub>2</sub>RhCl(COD)]

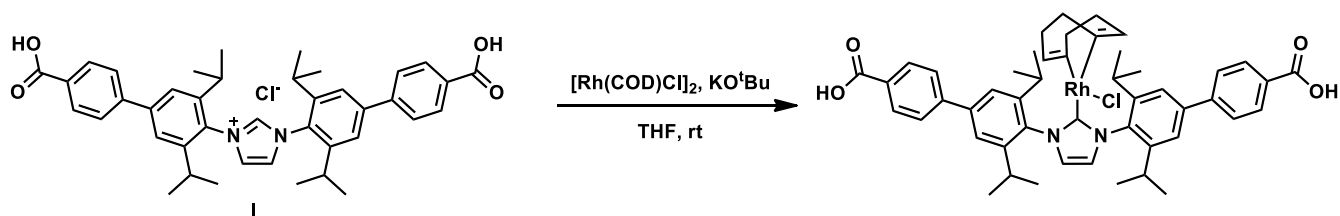

A flask was charged with precursor **I** (50 mg, 0.075 mmol), potassium tert-butoxide (60.7 mg, 0.27 mmol) and Chloro(1,5-cyclooctadiene)rhodium(I) dimer (22 mg, 0.045 mmol). To this flask, dry tetrahydrofuran (THF) was added and the reaction mixture was stirred for 48 h under a nitrogen atmosphere. The mixture was filtered through Celite. The filtrate was evaporated and acidified with 1 N HCl. The crude material was washed with water and recrystallized from methanol to give 31 mg of desired complex (47% yield). <sup>1</sup>H NMR (400 MHz, CD<sub>3</sub>OD): δ 8.10-8.07 (d, 4H), 7.73-7.70 (d, 4H), 7.65 (s, 4H), 7.46 (s, 2H), 4.53-4.43

(m, 2H), 3.67-3.60 (m, 2H), 3.49-3.47 (m, 2H), 2.69-2.61 (m, 2H), 2.54-2.42 (m, 2H), 1.91-1.87 (m, 2H), 1.78-1.73 (m, 2H), 1.59-1.40 (m, 18H), 1.35-1.32 (d, 1H), 1.20-1.18 (d, 12H);  $^{13}\text{C}$  NMR (100 MHz,  $\text{CD}_3\text{OD}$ ):  $\delta$  175.26, 144.01, 143.66, 138.44, 137.36, 130.97, 127.70, 127.53, 126.94, 97.05, 69.95, 69.81, 33.59, 30.29, 29.16, 26.85

## Experimental procedures for construction of MOFs

### MOF<sub>CuCl</sub>

$\text{Zn}(\text{NO}_3)_2 \cdot 6\text{H}_2\text{O}$  (0.16 mmol, 49 mg), **NHC-CuCl** (0.041 mmol, 30 mg) were added to 4-mL vial with mixed solvent of *N*-methyl-pyrrolidone (1 mL) and *p*-xylene (2 mL). The vial was sealed and placed in a preheated oven at 80 °C. After 72 h, block shaped crystals were obtained. The crystals were washed with DMF, followed by exchange solvent to THF. The crystals dried under vacuum to afford 28 mg of product as white crystals (75% yield). Anal. Calcd for  $\text{C}_{128.25}\text{H}_{139.25}\text{N}_{9.75}\text{O}_{21.25}\text{Zn}_4\text{Cu}_3\text{Cl}_3 \cdot \{\text{Zn}_4\text{L}_3(\text{NO}_3)_2(\text{C}_3\text{H}_7\text{NO})_{1.75}(\text{H}_2\text{O})_{0.5}\}$  C, 56.72; H, 5.17; N, 5.03. Found: C, 56.58; H, 5.12; N, 5.04.

### MOF<sub>CuBr</sub>

$\text{Zn}(\text{NO}_3)_2 \cdot 6\text{H}_2\text{O}$  (0.15 mmol, 46 mg), **NHC-CuBr** (0.039 mmol, 30 mg) were added to 4-mL vial with mixed solvent of *N*-methyl-pyrrolidone (1 mL) and *p*-xylene (2 mL). The vial was sealed and placed in a preheated oven at 80 °C. After 72 h, block shaped crystals were obtained. The crystals were washed with DMF, followed by exchange solvent to THF. The crystals dried under vacuum to afford 30 mg of product as white crystals (82% yield). Anal. Calcd for  $\text{C}_{126}\text{H}_{134.5}\text{N}_9\text{O}_{20.75}\text{Zn}_4\text{Cu}_3\text{Br}_3 \cdot \{\text{Zn}_4\text{L}_3(\text{NO}_3)_2(\text{C}_3\text{H}_7\text{NO})(\text{H}_2\text{O})_{0.75}\}$  C, 54.07; H, 4.84; N, 4.50. Found: C, 54.12; H, 4.92; N, 4.59.

### MOF<sub>CuI</sub>

$\text{Zn}(\text{NO}_3)_2 \cdot 6\text{H}_2\text{O}$  (0.15 mmol, 44 mg), **NHC-CuI** (0.037 mmol, 30 mg) were added to 4-mL vial with mixed solvent of *N*-methyl-pyrrolidone (1 mL) and *p*-xylene (2 mL). The vial was sealed and placed in a preheated oven at 80 °C. After 72 h, block shaped crystals were obtained. The crystals were washed with DMF, followed by exchange solvent to THF. The crystals dried under vacuum to afford 29 mg of product as white crystals (77% yield). Anal. Calcd for  $\text{C}_{130.5}\text{H}_{144.5}\text{N}_{10.5}\text{O}_{22}\text{Zn}_4\text{Cu}_3\text{I}_3 \cdot \{\text{Zn}_4\text{L}_3(\text{NO}_3)_2(\text{C}_3\text{H}_7\text{NO})_{2.5}(\text{H}_2\text{O})_{0.5}\}$  C, 51.47; H, 4.78; N, 4.83. Found: C, 51.45; H, 4.59; N, 4.77.

## MOF<sub>AuCl</sub>

Zn(NO<sub>3</sub>)<sub>2</sub>·6H<sub>2</sub>O (0.14 mmol, 42 mg), **NHC-AuCl** (0.035 mmol, 30 mg) were added to 4-mL vial with mixed solvent of *N*-methyl-pyrrolidone (1 mL) and *p*-xylene (2 mL). The vial was sealed and placed in a preheated oven at 80 °C. After 72 h, block shaped crystals were obtained. The crystals were washed with DMF, followed by exchange solvent to THF. The crystals dried under vacuum to afford 26 mg of product as white crystals (73% yield). Anal. Calcd for C<sub>129</sub>H<sub>142</sub>N<sub>10</sub>O<sub>22</sub>Zn<sub>4</sub>Au<sub>3</sub>Cl<sub>3</sub>: {Zn<sub>4</sub>L<sub>3</sub>(NO<sub>3</sub>)<sub>2</sub>(C<sub>3</sub>H<sub>7</sub>NO)(H<sub>2</sub>O)} C, 49.29; H, 4.55; N, 4.46. Found: C, 49.13; H, 4.61; N, 4.38.

## References

1. Santoro, O.; Collado, A.; Slawin, A. M. Z.; Nolan, S. P.; Cazin, C. S. J. A general synthetic route to [Cu(X)(NHC)] (NHC = N-heterocyclic carbene, X = Cl, Br, I) complexes. *Chem. Commun.* **2013**, 49, 10483-10485.
2. Collado, A.; Gómez-Suárez, A.; Martin, A. R.; Slawin, A. M. Z.; Nolan, S. P. Straightforward synthesis of [Au(NHC)X] (NHC = N-heterocyclic carbene, X = Cl, Br, I) complexes. *Chem. Commun.*, **2013**, 49, 5541-5543.
3. Kim, H.; Kim, H.; Kim, K.; Lee, E. Structural Control of Metal–Organic Framework Bearing N-Heterocyclic Imidazolium Cation and Generation of Highly Stable Porous Structure. *Inorg. Chem.* **2019**, 58, 6619-6627.

## Crystal structures of Cu-NHC MOF and Au-NHC MOF

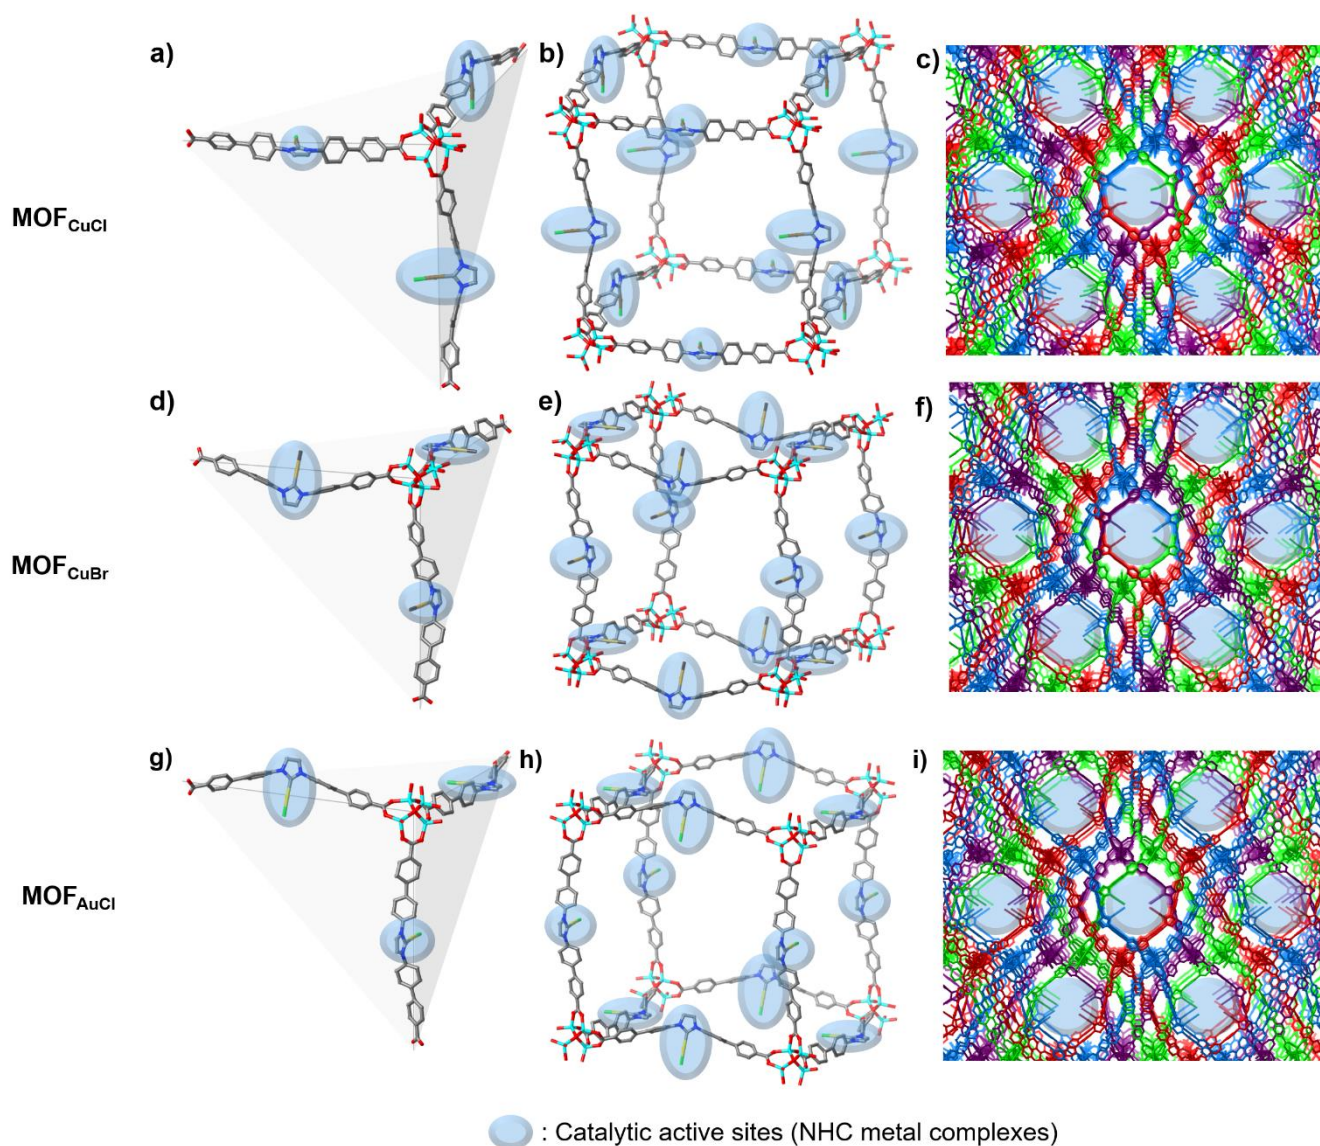

**Figure S1.** Single crystal X-ray structures of copper(I) chloride, copper(I) bromide, and gold(I) chloride bounded Zn MOFs. (a) coordination environment, (b) single set of cubic network, and (c) perspective view of 4-fold interpenetrated network of CuCl bounded Zn MOF. (d) coordination environment, (e) single set of cubic network, and (f) perspective view of 4-fold interpenetrated network of CuBr bounded Zn MOF. (g) coordination environment, (h) single set of cubic network, and (i) perspective view of 4-fold interpenetrated network of AuCl bounded Zn MOF. (C: gray, N: blue, O: red, Zn: cyan, Cu: brown, Au: yellow, Cl: light green, Br: dark brown. Hydrogen atoms and isopropyl substituents are omitted for clarity.)

## Analysis of Digested Solution of Cu-NHC MOFs and Au-NHC MOF by ICP-OES

As-synthesized Cu-NHC MOFs and Au-NHC MOFs were soaked in THF for 3 days and evacuated by heating to 100 °C under a high vacuum ( $10^{-2}$  Pa) for overnight to remove residual solvents in MOFs.

The activated MOFs (MOF<sub>CuCl</sub> (21 mg, C<sub>123</sub>H<sub>126</sub>N<sub>8</sub>O<sub>19</sub>Zn<sub>4</sub>Cu<sub>3</sub>Cl<sub>3</sub>: {Zn<sub>4</sub>L<sub>3</sub>(NO<sub>3</sub>)<sub>2</sub>}), MOF<sub>CuBr</sub> (20 mg, C<sub>123</sub>H<sub>126</sub>N<sub>8</sub>O<sub>19</sub>Zn<sub>4</sub>Cu<sub>3</sub>Br<sub>3</sub>: {Zn<sub>4</sub>L<sub>3</sub>(NO<sub>3</sub>)<sub>2</sub>}), MOF<sub>CuI</sub> (20 mg, C<sub>123</sub>H<sub>126</sub>N<sub>8</sub>O<sub>19</sub>Zn<sub>4</sub>Cu<sub>3</sub>I<sub>3</sub>: {Zn<sub>4</sub>L<sub>3</sub>(NO<sub>3</sub>)<sub>2</sub>}), MOF<sub>AuCl</sub> (14 mg, C<sub>123</sub>H<sub>126</sub>N<sub>8</sub>O<sub>19</sub>Zn<sub>4</sub>Au<sub>3</sub>Cl<sub>3</sub>: {Zn<sub>4</sub>L<sub>3</sub>(NO<sub>3</sub>)<sub>2</sub>})) were dissolved in 5 mL of 1 M HCl. To digested solution, 35 mL of 1% aqueous solution of nitric acid was added for dilution. The resulting solution was evaluated by inductively coupled plasma optical emission spectrometer (ICP-OES) for Cu, Au, and Zn contents.

**Table S1.** Compositional analysis of Cu-NHC MOFs and Au-NHC MOF by ICP-OES.

|                     | Formula                                                                                                                                                                               | Calculated (ppm) |           | Observed (ppm) |           |
|---------------------|---------------------------------------------------------------------------------------------------------------------------------------------------------------------------------------|------------------|-----------|----------------|-----------|
| MOF <sub>CuCl</sub> | C <sub>123</sub> H <sub>126</sub> N <sub>8</sub> O <sub>19</sub> Zn <sub>4</sub> Cu <sub>3</sub> Cl <sub>3</sub><br>{Zn <sub>4</sub> L <sub>3</sub> (NO <sub>3</sub> ) <sub>2</sub> } | Cu: 38.81        | Zn: 53.24 | Cu: 38.72      | Zn: 53.05 |
| MOF <sub>CuBr</sub> | C <sub>123</sub> H <sub>126</sub> N <sub>8</sub> O <sub>19</sub> Zn <sub>4</sub> Cu <sub>3</sub> Br <sub>3</sub><br>{Zn <sub>4</sub> L <sub>3</sub> (NO <sub>3</sub> ) <sub>2</sub> } | Cu: 35.15        | Zn: 48.21 | Cu: 35.35      | Zn: 48.68 |
| MOF <sub>CuI</sub>  | C <sub>123</sub> H <sub>126</sub> N <sub>8</sub> O <sub>19</sub> Zn <sub>4</sub> Cu <sub>3</sub> I <sub>3</sub><br>{Zn <sub>4</sub> L <sub>3</sub> (NO <sub>3</sub> ) <sub>2</sub> }  | Cu: 33.41        | Zn: 45.83 | Cu: 33.71      | Zn: 45.85 |
| MOF <sub>AuCl</sub> | C <sub>123</sub> H <sub>126</sub> N <sub>8</sub> O <sub>19</sub> Zn <sub>4</sub> Au <sub>3</sub> Cl <sub>3</sub><br>{Zn <sub>4</sub> L <sub>3</sub> (NO <sub>3</sub> ) <sub>2</sub> } | Au: 69.42        | Zn: 30.72 | Au: 69.79      | Zn: 31.03 |

## Nitrogen sorption isotherms of MOFs

Nitrogen sorption isotherms were measured with a Autosorp-iQ volumetric adsorption equipment. Typically, as-synthesized materials (~30 mg) was soaked in THF for 3 days in order to remove residual solvents in the frameworks and evacuated by heating to 100 °C under a high vacuum ( $10^{-2}$  Pa) for overnight. Nitrogen isotherm was collected at 77 K. BET surface areas of  $\text{MOF}_{\text{CuCl}}$ ,  $\text{MOF}_{\text{CuBr}}$ ,  $\text{MOF}_{\text{CuI}}$  and  $\text{MOF}_{\text{AuCl}}$  are 1070  $\text{m}^2/\text{g}$ , 1002  $\text{m}^2/\text{g}$ , 958  $\text{m}^2/\text{g}$  and 984  $\text{m}^2/\text{g}$ , respectively.

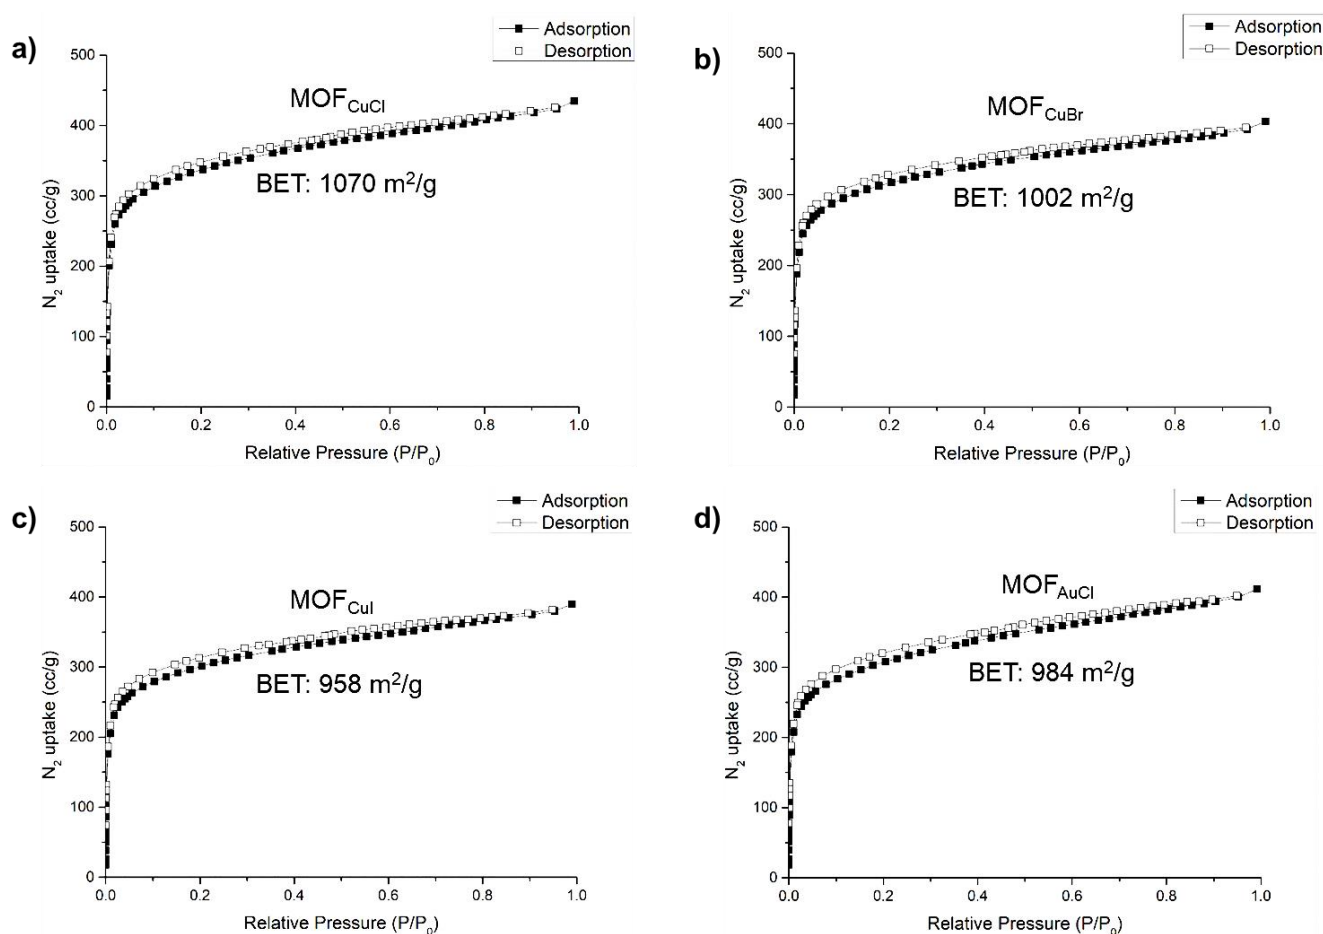

**Figure S2.**  $\text{N}_2$  sorption isotherms of (a)  $\text{MOF}_{\text{CuCl}}$ , (b)  $\text{MOF}_{\text{CuBr}}$ , (c)  $\text{MOF}_{\text{CuI}}$ , (d)  $\text{MOF}_{\text{AuCl}}$  at 77 K. (open symbols: desorption, closed symbols: adsorption)

## Recycle experiments and ICP spectroscopic evaluations

### 1. Cu-catalyzed azide-alkyne cycloaddition

#### Recycle Experiment in CuAAC

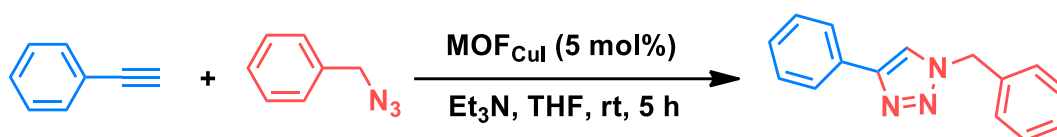

To THF (1.2 mL) in a vessel was added  $\text{MOF}_{\text{CuI}}$  (51 mg, 0.054 mmol, 5 mol%), phenylacetylene (118  $\mu\text{L}$ , 1.07 mmol, 1 eq), TEA (180  $\mu\text{L}$ , 1.30 mmol, 1.2 eq) under  $\text{N}_2$  atmosphere, and then, benzyl azide (163  $\mu\text{L}$ , 1.30 mmol, 1.2 eq) was added slowly to the above vessel. The reaction mixture was stirred at room temperature for 5 h. The yield of the reaction was determined by  $^1\text{H}$  NMR (400 MHz) spectroscopy using  $\text{CH}_2\text{Br}_2$  as an internal standard in  $\text{CDCl}_3$ . After each cycle,  $\text{MOF}_{\text{CuI}}$  was separated by filtration, washed with DMF and THF and dried under high vacuum for 16 h, then reused in a freshly made reaction mixture.

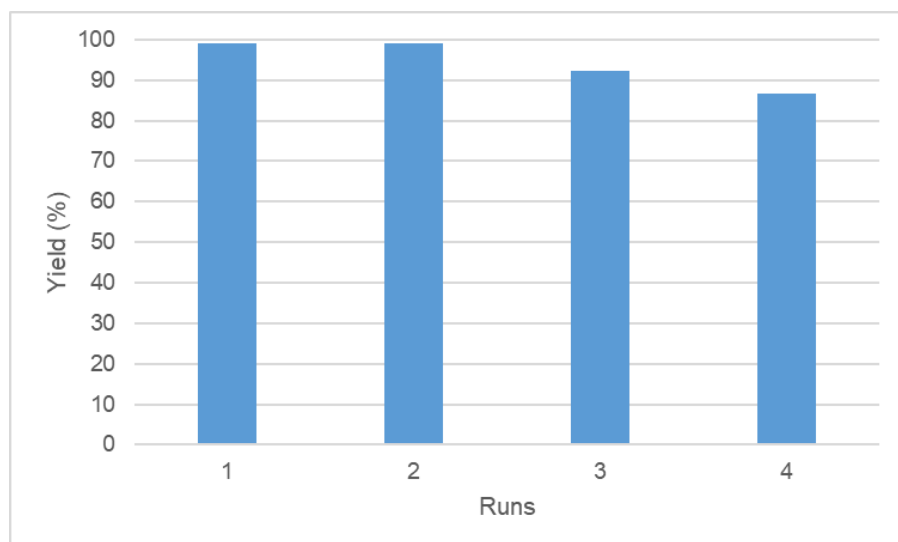

**Figure S3.** Recycling experiments of  $\text{MOF}_{\text{CuI}}$  in Cu-catalyzed azide-alkyne cycloaddition reaction.



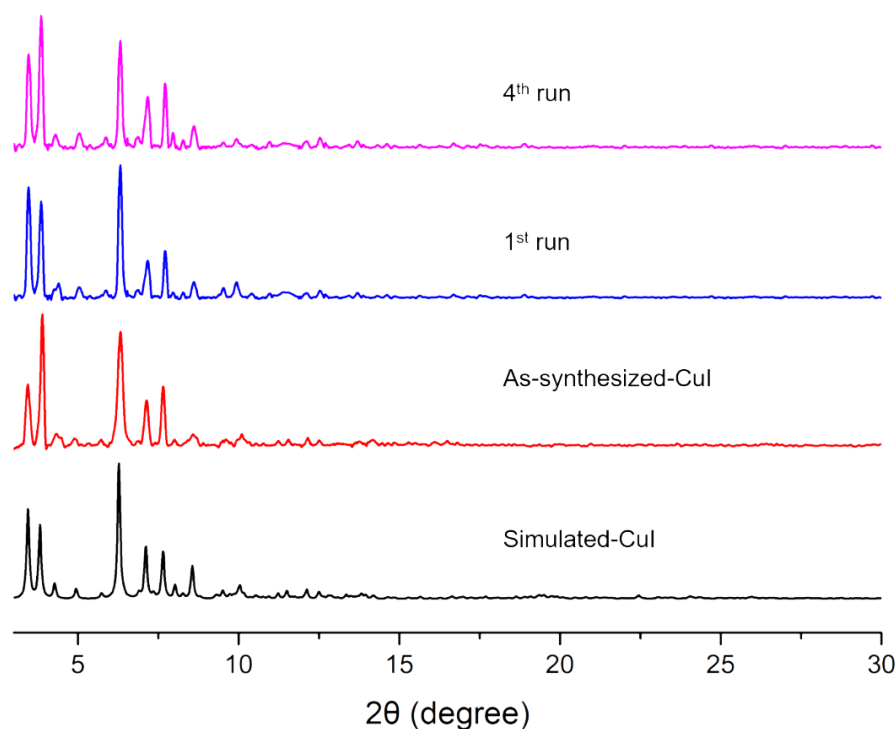

**Figure S4.** Powder X-ray diffraction (PXRD) profiles of as-synthesized  $\text{MOF}_{\text{CuI}}$  (red), after Cu-catalyzed azide-alkyne cycloaddition reaction between phenylacetylene and benzyl azide (blue) and after 4<sup>th</sup> run (magenta).

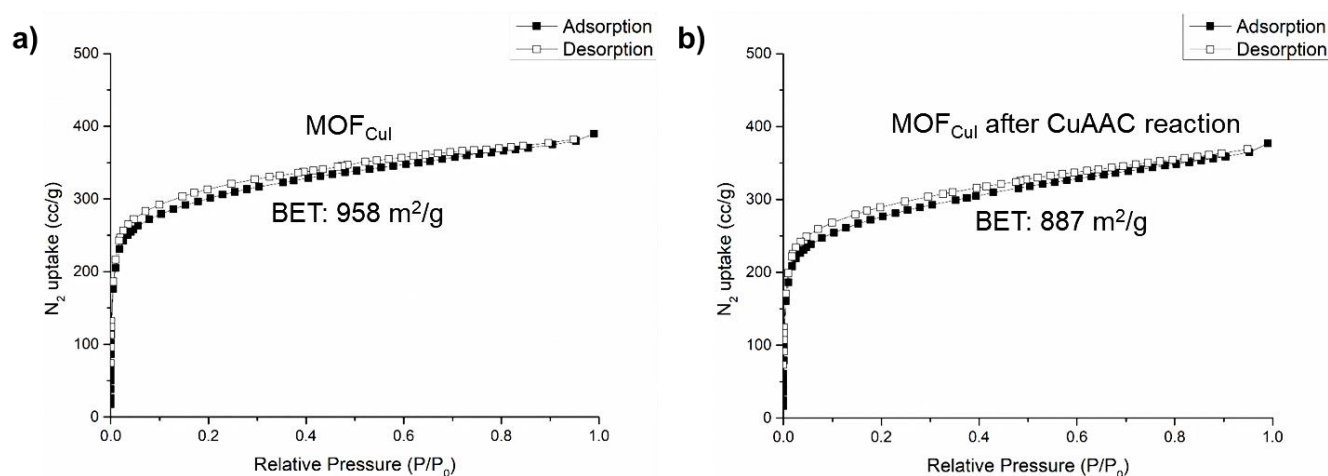

**Figure S5.**  $\text{N}_2$  sorption isotherms of (a) as-synthesized  $\text{MOF}_{\text{CuI}}$ , (b) after 4<sup>th</sup> run of Cu-catalyzed azide-alkyne cycloaddition reaction between phenylacetylene and benzyl azide.

## ICP spectrometric evaluation of metal loss in CuAAC

To THF (1.2 mL) in a vessel was added  $\text{MOF}_{\text{CuI}}$  (51 mg, 0.054 mmol, 5 mol%), phenylacetylene (118  $\mu\text{L}$ , 1.07 mmol, 1 eq), TEA (180  $\mu\text{L}$ , 1.30 mmol, 1.2 eq) under  $\text{N}_2$  atmosphere, and then, benzyl azide (163  $\mu\text{L}$ , 1.30 mmol, 1.2 eq) was added slowly to the above vessel. The reaction mixture was stirred at room temperature. After 5 h, the mixture was passed through a pad of celite, and washed by THF. The combined organic solvent was removed under reduced pressure. The remaining solid mixture was

dissolved in 5 mL of 1% aqueous solution (use doubly distilled water) of nitric acid by sonication. The resulting solution was then evaluated by inductively coupled plasma optical emission spectrometer (ICP-OES) for Cu and Zn contents. The Cu and Zn contents were measured in ppm based on calibration curves obtained with a series of calibration standard solutions doped with different amount of Cu and Zn. The quantity of Cu lost and Zn lost from CuI MOF was calculated to be 0.08% (0.572 ppm) of total Cu and 0.06% (0.515 ppm) of total Zn, respectively.

## 2. Cu-catalyzed multicomponent reaction

### Recycle Experiment in MCR

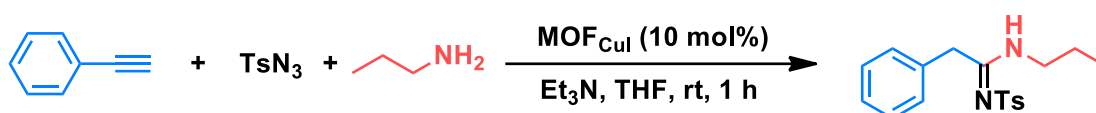

To THF (1.3 mL) in a vessel was added MOF<sub>CuI</sub> (65 mg, 0.075 mmol, 10 mol%), phenylacetylene (75  $\mu$ L, 0.68 mmol, 1 eq), propylamine (75  $\mu$ L, 0.83 mmol, 1.2 eq), TEA (113  $\mu$ L, 0.83 mmol, 1.2 eq) under N<sub>2</sub> atmosphere, and then, tosyl azide (126  $\mu$ L, 0.83 mmol, 1.2 eq) was added slowly to the above vessel. The reaction mixture was stirred at room temperature for 1 h. The yield of the reaction was determined by <sup>1</sup>H NMR (400 MHz) spectroscopy using CH<sub>2</sub>Br<sub>2</sub> as an internal standard in CDCl<sub>3</sub>. After each cycle, CuI MOF was separated by filtration, washed with DMF and THF and dried under high vacuum for 16 h, then reused in a freshly made reaction mixture.

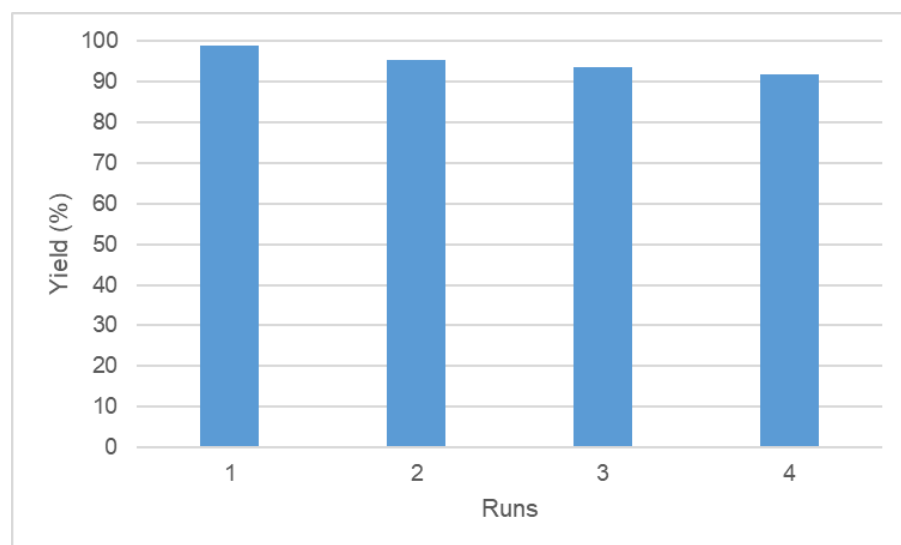

**Figure S6.** Recycling experiments of MOF<sub>CuI</sub> in multicomponent reaction.

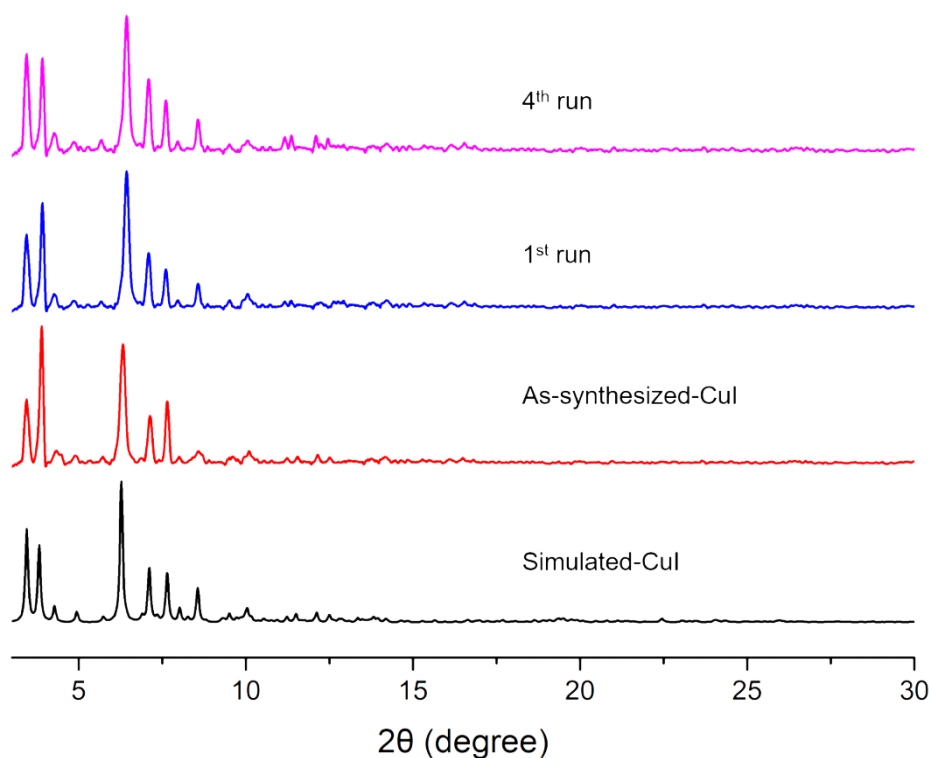

**Figure S7.** Powder X-ray diffraction (PXRD) profiles of as-synthesized  $\text{MOF}_{\text{CuI}}$  (red), after multicomponent reaction between phenylacetylene, tosyl azide and propylamine (blue) and after 4<sup>th</sup> run (magenta).

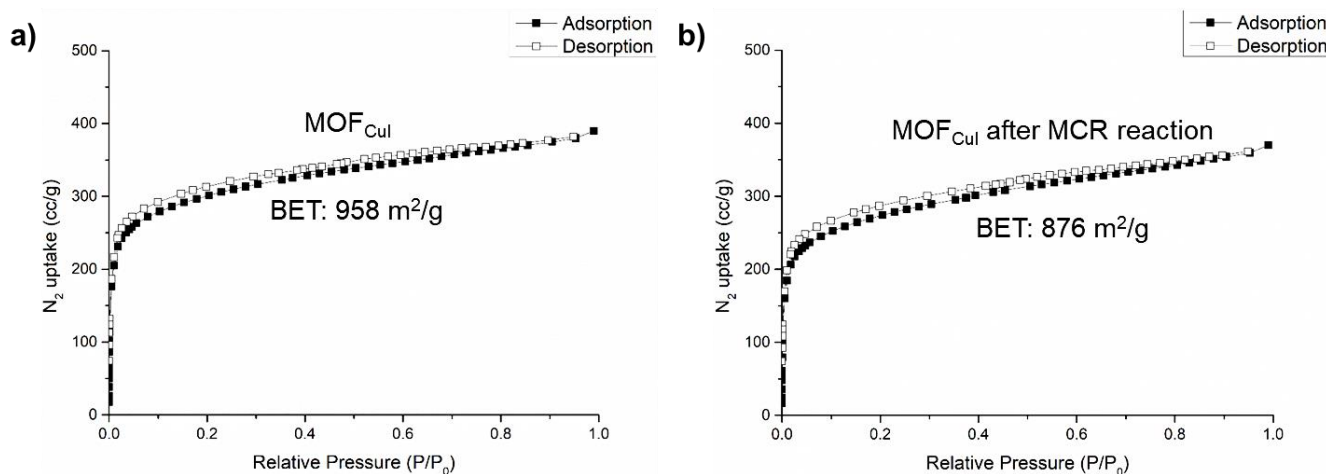

**Figure S8.**  $\text{N}_2$  sorption isotherms of (a) as-synthesized  $\text{MOF}_{\text{CuI}}$ , (b) after 4<sup>th</sup> run of multicomponent reaction between phenylacetylene, tosyl azide and propylamine.

### ICP spectrometric evaluation of metal loss in MCR

To THF (1.3 mL) in a vessel was added  $\text{MOF}_{\text{CuI}}$  (65 mg, 0.075 mmol, 10 mol%), phenylacetylene (75  $\mu\text{L}$ , 0.68 mmol, 1 eq), propylamine (75  $\mu\text{L}$ , 0.83 mmol, 1.2 eq), TEA (113  $\mu\text{L}$ , 0.83 mmol, 1.2 eq) under  $\text{N}_2$  atmosphere, and then, tosyl azide (126  $\mu\text{L}$ , 0.83 mmol, 1.2 eq) was added slowly to the above vessel. The reaction mixture was stirred at room temperature. After 1 h, the mixture was passed through a pad of celite, and washed by THF. The combined organic solvent was removed under reduced pressure. The

remaining solid mixture was dissolved in 5 mL of 1% aqueous solution (use doubly distilled water) of nitric acid by sonication. The resulting solution was then evaluated by inductively coupled plasma optical emission spectrometer (ICP-OES) for Cu and Zn contents. The Cu and Zn contents were measured in ppm based on calibration curves obtained with a series of calibration standard solutions doped with different amount of Cu and Zn. The quantity of Cu lost and Zn lost from CuI MOF was calculated to be 0.08% (0.731 ppm) of total Cu and 0.04% (0.509 ppm) of total Zn, respectively.

### 3. Au-catalyzed hydroamination

#### Recycle Experiment in hydroamination

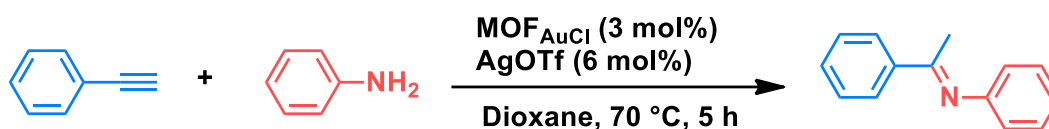

To dioxane (2.2 mL) in a vessel was added  $\text{MOF}_{\text{AuCl}}$  (34 mg, 0.034 mmol, 3 mol%), AgOTf (19 mg, 0.069 mmol, 6 mol%), phenylacetylene (126  $\mu\text{L}$ , 1.14 mmol, 1 eq) under  $\text{N}_2$  atmosphere, and then, aniline (114  $\mu\text{L}$ , 1.38 mmol, 1.2 eq) was added slowly to the above vessel. The reaction mixture was stirred at 70  $^{\circ}\text{C}$  for 5 h. The yield of the reaction was determined by  $^1\text{H}$  NMR (400 MHz) spectroscopy using  $\text{CH}_2\text{Br}_2$  as an internal standard in  $\text{CDCl}_3$ . After each cycle, CuI MOF was separated by filtration, washed with DMF and THF and dried under high vacuum for 16 h, then reused in a freshly made reaction mixture.

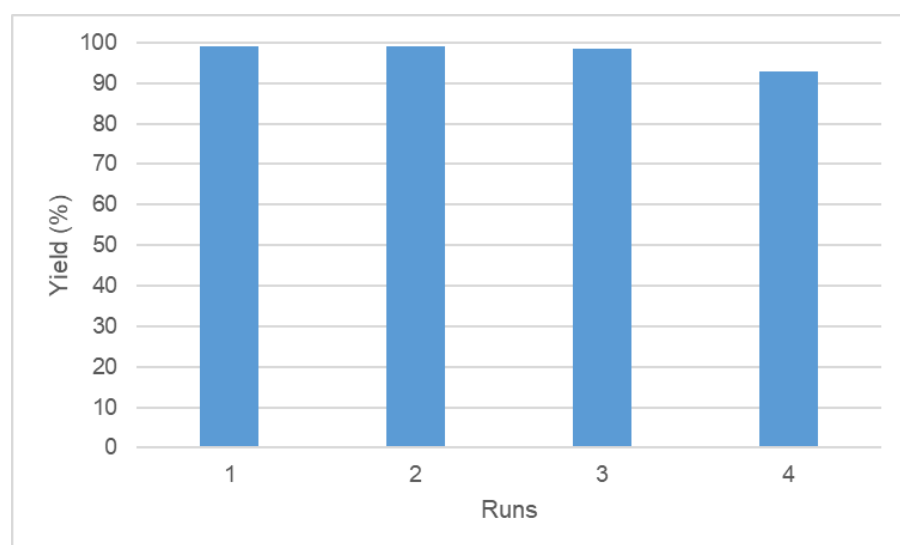

**Figure S9.** Recycling experiments of  $\text{MOF}_{\text{AuCl}}$  in hydroamination reaction.

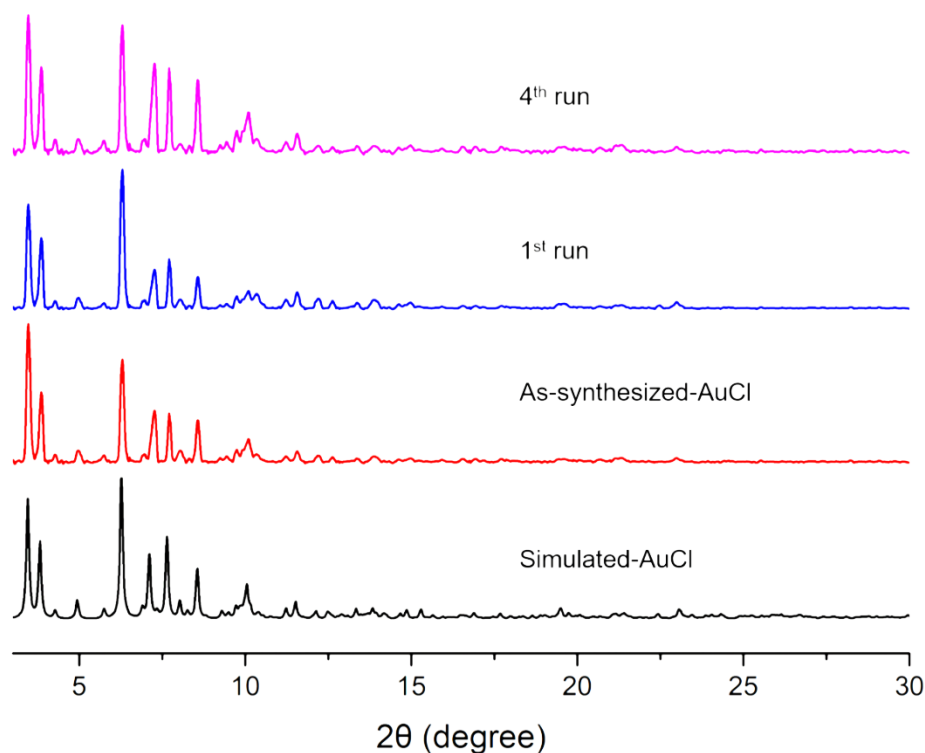

**Figure S10.** Powder X-ray diffraction (PXRD) profiles of as-synthesized MOF<sub>AuCl</sub> (red), after hydroamination reaction between phenylacetylene and aniline (blue) and after 4<sup>th</sup> run (magenta).

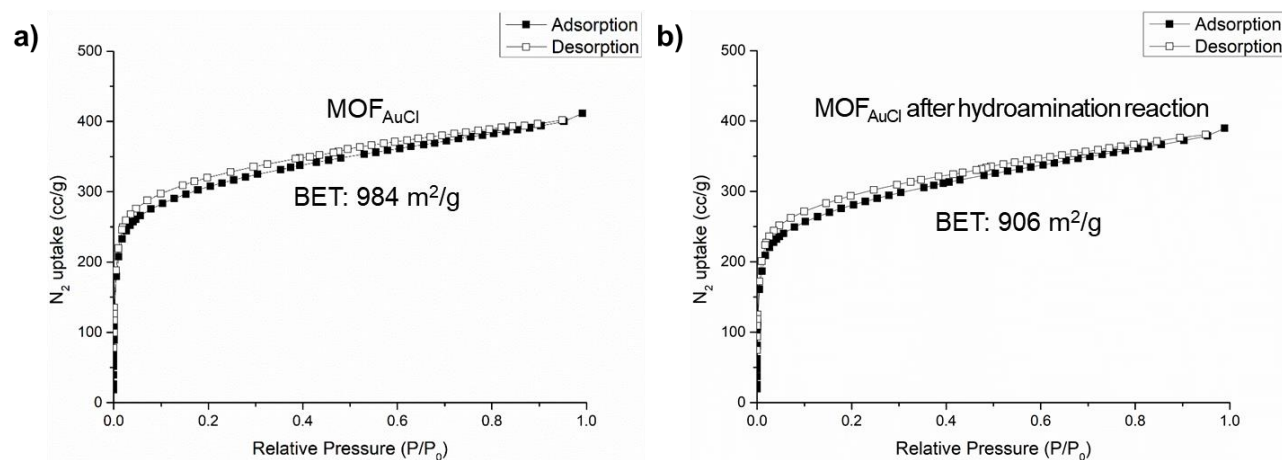

**Figure S11.** N<sub>2</sub> sorption isotherms of (a) as-synthesized MOF<sub>AuCl</sub>, (b) after 4<sup>th</sup> run of hydroamination reaction between phenylacetylene and aniline.

### ICP spectrometric evaluation of metal loss in hydroamination

To dioxane (2.2 mL) in a vessel was added MOF<sub>AuCl</sub> (34 mg, 0.034 mmol, 3 mol%), AgOTf (19 mg, 0.069 mmol, 6 mol%), phenylacetylene (126  $\mu$ L, 1.14 mmol, 1 eq) under N<sub>2</sub> atmosphere, and then, aniline (114  $\mu$ L, 1.38 mmol, 1.2 eq) was added slowly to the above vessel. The reaction mixture was stirred at 70  $^{\circ}$ C for 5 h. After 5 h, the mixture was passed through a pad of celite, and washed by THF. The combined organic solvent was removed under reduced pressure. The remaining solid mixture was dissolved in 5

mL of 1% aqueous solution (use doubly distilled water) of nitric acid by sonication. The resulting solution was then evaluated by inductively coupled plasma optical emission spectrometer (ICP-OES) for Au and Zn contents. The Au and Zn contents were measured in ppm based on calibration curves obtained with a series of calibration standard solutions doped  $\text{MOF}_{\text{AuCl}}$  with different amount of Au and Zn. The quantity of Au lost and Zn lost from was calculated to be 0.05% (0.728 ppm) of total Au and 0.08% (0.504 ppm) of total Zn, respectively.

## Experimental details of catalyzed reactions

### 1. Cu-catalyzed azide-alkyne cycloaddition

**Caution! Organic azides are potentially-explosive substances that can and will decompose with the slightest input of energy from external sources (heat, light, pressure).**

**Typical procedure (A, heterogeneous catalyst):** To THF (0.1 mL) in a vessel was added MOF<sub>CuI</sub> (4.3 mg, 4.6 μmol, 5 mol%), alkyne (0.091 mmol, 1 eq), TEA (15.2 μL, 0.11 mmol, 1.2 eq) under N<sub>2</sub> atmosphere, and then, azide (0.11 mmol, 1.2 eq) was added slowly to the above vessel. The reaction mixture was stirred at room temperature for 5 h. The crude compound was isolated by silica column chromatography.

**Typical procedure (B, homogeneous catalyst):** To THF (0.1 mL) in a vessel was added IPrCuI (Iodo[1,3-bis(2,6-diisopropylphenyl)imidazol-2-ylidene]copper(I)) (2.6 mg, 4.6 μmol, 5 mol%), alkyne (0.091 mmol, 1 eq), TEA (15.2 μL, 0.11 mmol, 1.2 eq) under N<sub>2</sub> atmosphere, and then, azide (0.11 mmol, 1.2 eq) was added slowly to the above vessel. The reaction mixture was stirred at room temperature for 5 h. The crude compound was isolated by silica column chromatography.

#### 1-benzyl-4-phenyl-1*H*-1,2,3-triazole

The crude compound was isolated by silica column chromatography eluting with hexane/ethyl acetate (5:1, R<sub>f</sub>: 0.21) to afford **1** as white solid (**A**: 40 mg, 95% yield, **B**: 43 mg, 99% yield). <sup>1</sup>H NMR (400 MHz, CDCl<sub>3</sub>): δ 7.85-7.83 (d, 2H), 7.71 (s, 1H), 7.44-7.32 (m, 8H), 5.61 (s, 2H); <sup>13</sup>C NMR (100 MHz, CDCl<sub>3</sub>): δ 148.20, 134.78, 130.61, 129.15, 128.83, 128.76, 128.17, 128.06, 125.72, 119.66, 54.19. These spectroscopic data are consistent with those previously reported in the literature.<sup>4</sup>

#### 1-(4-nitrobenzyl)-4-phenyl-1*H*-1,2,3-triazole

The crude compound was isolated by silica column chromatography eluting with hexane/ethyl acetate (5:1, R<sub>f</sub>: 0.11) to afford **2** as yellow solid (47 mg, 93% yield). <sup>1</sup>H NMR (400 MHz, CDCl<sub>3</sub>): δ 8.28-8.26 (d, 2H), 7.85-7.84 (d, 2H), 7.83 (s, 1H), 7.48-7.33 (m, 5H), 5.73 (s, 2H); <sup>13</sup>C NMR (100 MHz, CDCl<sub>3</sub>): δ 148.78, 148.18, 141.86, 130.18, 129.02, 128.67, 128.61, 125.85, 124.42, 119.90, 53.28. These spectroscopic data are consistent with those previously reported in the literature.<sup>6</sup>

#### 1-(4-methoxybenzyl)-4-phenyl-1*H*-1,2,3-triazole

The crude compound was isolated by silica column chromatography eluting with hexane/ethyl acetate (3:1,  $R_f$ : 0.44) to afford **3** as yellow solid (44 mg, 92% yield).  $^1\text{H}$  NMR (400 MHz,  $\text{CDCl}_3$ ):  $\delta$  7.82-7.80 (dd, 2H), 7.64 (s, 2H), 7.43-7.28 (m, 4H), 6.95-6.92 (d, 2H), 5.53 (s, 2H), 3.84 (s, 3H);  $^{13}\text{C}$  NMR (100 MHz,  $\text{CDCl}_3$ ):  $\delta$  159.99, 148.10, 130.69, 129.70, 128.83, 128.15, 126.72, 125.72, 119.44, 114.55, 55.38, 53.79. These spectroscopic data are consistent with those previously reported in the literature.<sup>8</sup>

#### **1-benzyl-4-(4-nitrophenyl)-1*H*-1,2,3-triazole**

The crude compound was isolated by silica column chromatography eluting with hexane/ethyl acetate (3:1,  $R_f$ : 0.32) to afford **4** as yellow solid (46 mg, 92% yield).  $^1\text{H}$  NMR (400 MHz,  $\text{CDCl}_3$ ):  $\delta$  8.30-8.28 (d, 2H), 8.00-7.98 (d, 2H), 7.81 (s, 1H), 7.44-7.32 (m, 5H), 5.63 (s, 2H);  $^{13}\text{C}$  NMR (100 MHz,  $\text{CDCl}_3$ ):  $\delta$  147.45, 146.44, 137.00, 134.30, 129.43, 129.20, 128.33, 126.25, 124.40, 121.33, 54.66. These spectroscopic data are consistent with those previously reported in the literature.<sup>5</sup>

#### **1-benzyl-4-(4-methoxyphenyl)-1*H*-1,2,3-triazole**

The crude compound was isolated by silica column chromatography eluting with hexane/ethyl acetate (3:1,  $R_f$ : 0.35) to afford **5** as yellow solid (42 mg, 90% yield).  $^1\text{H}$  NMR (400 MHz,  $\text{CDCl}_3$ ):  $\delta$  7.76-7.73 (d, 2H), 7.59 (s, 1H), 7.42-7.32 (m, 5H), 6.96-6.94 (d, 2H), 5.59 (s, 2H), 3.85 (s, 3H);  $^{13}\text{C}$  NMR (100 MHz,  $\text{CDCl}_3$ ):  $\delta$  159.69, 148.17, 134.91, 129.20, 128.80, 128.12, 127.09, 123.41, 118.82, 114.30, 55.39, 54.25. These spectroscopic data are consistent with those previously reported in the literature.<sup>5</sup>

#### **1-([1,1'-biphenyl]-4-ylmethyl)-4-phenyl-1*H*-1,2,3-triazole**

The crude compound was isolated by silica column chromatography eluting with hexane/ethyl acetate (3:1,  $R_f$ : 0.40) to afford **6** as yellow solid (**A**: 35 mg, 61% yield, **B**: 48 mg, 85% yield).  $^1\text{H}$  NMR (400 MHz,  $\text{CDCl}_3$ ):  $\delta$  7.85-7.82 (d, 2H), 7.73 (s, 1H), 7.65-7.57 (m, 4H), 7.49-7.32 (m, 8H), 5.65 (s, 2H);  $^{13}\text{C}$  NMR (100 MHz,  $\text{CDCl}_3$ ):  $\delta$  148.51, 141.96, 140.36, 133.71, 130.67, 129.02, 128.67, 128.33, 128.00, 127.83, 127.25, 125.85, 119.72, 54.12. These spectroscopic data are consistent with those previously reported in the literature.<sup>9</sup>

#### **4-([1,1'-biphenyl]-4-yl)-1-benzyl-1*H*-1,2,3-triazole**

The reaction mixture was stirred at room temperature for 5 h. The crude compound was isolated by silica column chromatography eluting with hexane/ethyl acetate (3:1,  $R_f$ : 0.42) to afford **7** as yellow solid (**A**: 11 mg, 20% yield, **B**: 41 mg, 73%).  $^1\text{H}$  NMR (400 MHz,  $\text{CDCl}_3$ ):  $\delta$  7.92 (s, 2H), 7.68-7.63 (m, 4H), 7.48-7.25 (m, 9H), 5.62 (s, 2H);  $^{13}\text{C}$  NMR (100 MHz,  $\text{CDCl}_3$ ):  $\delta$  141.08, 140.73, 134.77, 129.32, 129.00, 128.96, 128.29, 127.69, 127.59, 127.12, 126.11, 54.73. These spectroscopic data are consistent with those previously reported in the literature.<sup>7</sup>



### **1-(naphthalen-1-ylmethyl)-4-phenyl-1*H*-1,2,3-triazole**

The crude compound was isolated by silica column chromatography eluting with hexane/ethyl acetate (3:1, *R*<sub>f</sub>: 0.47) to afford **8** as yellow solid (**A**: 22 mg, 43% yield, **B**: 39 mg, 76% yield). <sup>1</sup>H NMR (400 MHz, CDCl<sub>3</sub>): δ 8.05-8.02(m, 1H), 7.96-7.91(m, 2H), 7.77 (s, 2H), 7.58-7.50 (m, 5H), 7.40-7.30 (m, 3H), 6.05 (s, 2H); <sup>13</sup>C NMR (100 MHz, CDCl<sub>3</sub>): δ 148.00, 133.95, 131.19, 130.55, 130.05, 129.97, 138.96, 128.76, 128.11, 127.80, 127.34, 126.46, 125.66, 125.41, 122.93, 119.60, 52.36. These spectroscopic data are consistent with those previously reported in the literature.<sup>8</sup>

### **1-benzyl-4-(4-(trifluoromethyl)phenyl)-1*H*-1,2,3-triazole**

The crude compound was isolated by silica column chromatography eluting with hexane/ethyl acetate (5:1, *R*<sub>f</sub>: 0.37) to afford **25** as yellow solid (35 mg, 93% yield). <sup>1</sup>H NMR (400 MHz, CDCl<sub>3</sub>): δ 7.97-7.95 (d, 2H), 7.80 (s, 1H), 7.69-7.67 (d, 2H), 7.44-7.32 (m, 5H), 5.62 (s, 2H); <sup>13</sup>C NMR (100 MHz, CDCl<sub>3</sub>): δ 146.95, 134.53, 134.13, 130.57, 130.25, 129.93, 129.60, 129.35, 129.05, 128.24, 125.94, 125.88, 125.84, 125.56, 124.31, 122.86, 120.41, 54.47. These spectroscopic data are consistent with those previously reported in the literature.<sup>6</sup>

### **1-benzyl-4-(*p*-tolyl)-1*H*-1,2,3-triazole**

The crude compound was isolated by silica column chromatography eluting with hexane/ethyl acetate (5:1, *R*<sub>f</sub>: 0.15) to afford **26** as yellow solid (41 mg, 91% yield). <sup>1</sup>H NMR (400 MHz, CDCl<sub>3</sub>): δ 7.72-7.71 (d, 2H), 7.66 (s, 1H), 7.42-7.3 (m, 5H), 7.24-7.22 (d, 2H), 5.59 (s, 2H), 2.38 (s, 3H); <sup>13</sup>C NMR (100 MHz, CDCl<sub>3</sub>): δ 148.48, 138.07, 134.87, 129.57, 129.21, 128.82, 128.14, 127.90, 125.68, 119.35, 54.30, 21.35. These spectroscopic data are consistent with those previously reported in the literature.<sup>5</sup>

### **1-(4-methylbenzyl)-4-phenyl-1*H*-1,2,3-triazole**

The crude compound was isolated by silica column chromatography eluting with hexane/ethyl acetate (3:1, *R*<sub>f</sub>: 0.23) to afford **27** as white solid (43 mg, 94% yield). <sup>1</sup>H NMR (400 MHz, CDCl<sub>3</sub>): δ 8.11-7.78 (m, 2H), 7.43 (s, 2H), 7.37-7.33 (m, 1H), 7.22(s, 4H), 5.55 (s, 2H), 2.39 (s, 3H); <sup>13</sup>C NMR (100 MHz, CDCl<sub>3</sub>): δ 148.16, 138.74, 131.75, 130.69, 129.84, 128.83, 128.17, 128.15, 125.74, 119.52, 54.05, 21.22. These spectroscopic data are consistent with those previously reported in the literature.<sup>8</sup>

#### 4-phenyl-1-(4-(trifluoromethyl)benzyl)-1*H*-1,2,3-triazole

The crude compound was isolated by silica column chromatography eluting with hexane/ethyl acetate (5:1, *R<sub>f</sub>*: 0.21) to afford **28** as yellow solid (52 mg, 94% yield). <sup>1</sup>H NMR (400 MHz, CDCl<sub>3</sub>): δ 7.85-7.84 (m, 2H), 7.72 (s, 1H), 7.69-7.66 (d, 2H), 7.45-7.33(m, 5H), 5.68 (s, 2H); <sup>13</sup>C NMR (100 MHz, CDCl<sub>3</sub>): δ 148.61, 138.80, 131.53, 131.21, 130.88, 130.56, 130.42, 128.95, 128.42, 128.25, 126.22, 126.18, 126.14, 126.11, 125.78, 122.52, 119.81, 53.59. These spectroscopic data are consistent with those previously reported in the literature.<sup>6</sup>

## References

4. Poshala, S.; Thunga, S.; Manchala, S.; Kokatla, H. P. In Situ Generation of Copper Nanoparticles by Rongalite and Their Use as Catalyst for Click Chemistry in Water. *ChemistrySelect* **2018**, 3, 13759-13764.
5. Wang, S.; jia, K.; Cheng, J.; Cheng, Y.; Chen, Y.; Yuan, Y. Dual roles of substituted thiourea as reductant and ligand in CuAAC reaction. *Tetrahedron letters* **2017**, 58, 3717-3721.
6. Lim, M.; Lee, H.; Kang, M.; Yoo, W.; Rhee, H. Azide–alkyne cycloaddition reactions in water via recyclable heterogeneous Cu catalysts: reverse phase silica gel and thermoresponsive hydrogels. *RSC Adv.* **2018**, 8, 6152-6159.
7. Wu, Z.; Liao, X.; Yuan, L.; Wang, Y.; Zheng, Y.; Zuo, J.; Pan, Y. Visible-Light-Mediated Click Chemistry for Highly Regioselective Azide–Alkyne Cycloaddition by a Photoredox Electron-Transfer Strategy. *Chem. Eur. J.* **2020**, 26, 5694-5700.
8. Yamada, Y.; Sarkar, S.; Uozumi, Y. Amphiphilic Self-Assembled Polymeric Copper Catalyst to Parts per Million Levels: Click Chemistry. *J. Am. Chem. Soc.* **2012**, 134, 9285-9290.
9. Liu, Y.; Liu, P.; Liu, Y.; Wei, Y. Synthesis of Novel 1,4-Substituted 1,2,3-Triazoles by Water-Soluble (Salicyladimine)<sub>2</sub>Cu Complex Catalyzed Azide-Alkyne Cycloaddition in Water. *Letters in Organic Chemistry*, **2017**, 14, 557-565.

## 2. Cu-catalyzed multicomponent reaction

**Typical procedure (A, heterogeneous catalyst):** To THF (0.18 mL) in a vessel was added MOF<sub>CuI</sub> (8.7 mg, 9.1  $\mu$ mol, 10 mol%), alkyne (0.091 mmol, 1 eq), amine (0.11 mmol, 1.2 eq), TEA (15.2  $\mu$ L, 0.11 mmol, 1.2 eq) under N<sub>2</sub> atmosphere, and then, sulfonyl azide (0.11 mmol, 1.2 eq) was added slowly to the above vessel. The reaction mixture was stirred at room temperature for 1 h. The crude compound was isolated by silica column chromatography.

**Typical procedure (B, homogeneous catalyst):** To THF (0.18 mL) in a vessel was added IPrCuI (Iodo[1,3-bis(2,6-diisopropylphenyl)imidazol-2-ylidene]copper(I)) (5.3 mg, 9.1  $\mu$ mol, 10 mol%), alkyne (0.091 mmol, 1 eq), amine (0.11 mmol, 1.2 eq), TEA (15.2  $\mu$ L, 0.11 mmol, 1.2 eq) under N<sub>2</sub> atmosphere, and then, sulfonyl azide (0.11 mmol, 1.2 eq) was added slowly to the above vessel. The reaction mixture was stirred at room temperature for 1 h. The crude compound was isolated by silica column chromatography.

### 2-phenyl-*N*-propyl-*N*-tosylacetimidamide

The crude compound was isolated by silica column chromatography eluting with hexane/ethyl acetate (2:1, R<sub>f</sub>: 0.38) to afford **9** as white solid (**A**: 56 mg, 93% yield, **B**: 60 mg, 99% yield, a mixture of two isomers with a ratio 1:5, which is tentatively assigned as Z/E of the generated imino C=N double bond). <sup>1</sup>H NMR (400 MHz, CDCl<sub>3</sub>):  $\delta$  7.88-7.85 (d, 2H), 7.41-7.32 (m, 3H), 7.29-7.26 (d, 2H), 7.22-7.19 (dd, 2H), 5.17 (br, 1H), 4.29 (s, 2H), 3.21 (m, 2H), 2.42 (s, 3H), 1.43-1.36 (m, 2H), 0.76 (t, 3H); <sup>13</sup>C NMR (100 MHz, CDCl<sub>3</sub>):  $\delta$  166.69, 143.44, 142.19, 140.89, 139.40, 133.18, 130.20, 129.71, 129.48, 129.26, 128.21, 126.48, 126.41, 43.73, 39.78, 21.60, 11.20; HRMS (FAB) *m/z* calcd. for C<sub>18</sub>H<sub>22</sub>N<sub>2</sub>O<sub>2</sub>SNa [*M*+Na]<sup>+</sup> : 353.1300, found: 353.1297.

### 2-(4-nitrophenyl)-*N*-propyl-*N*-tosylacetimidamide

The crude compound was isolated by silica column chromatography eluting with hexane/ethyl acetate (2:1, R<sub>f</sub>: 0.17) to afford **10** as white solid (56 mg, 93% yield, a mixture of two isomers with a ratio 1:2, which is tentatively assigned as Z/E of the generated imino C=N double bond). <sup>1</sup>H NMR (400 MHz, CDCl<sub>3</sub>):  $\delta$  8.26-8.23 (d, 2H), 7.85-7.83 (d, 2H), 7.48-7.45 (d, 2H), 7.36-7.33 (d, 2H), 5.10 (br, 1H), 4.44 (s, 2H), 3.28-3.23 (m, 2H), 2.44 (s, 3H), 1.51-1.49 (m, 2H), 0.83 (t, 3H); <sup>13</sup>C NMR (100 MHz, CDCl<sub>3</sub>):  $\delta$  164.63, 147.13, 142.49, 141.81, 140.44, 130.30, 129.52, 129.46, 129.20, 126.20, 126.06, 123.92, 44.02, 39.10, 21.56, 21.43, 11.33, 11.03; HRMS (FAB) *m/z* calcd. for C<sub>18</sub>H<sub>21</sub>N<sub>3</sub>O<sub>4</sub>SNa [*M*+Na]<sup>+</sup> : 398.1151, found: 398.1148.

### 2-(4-methoxyphenyl)-*N*-propyl-*N*-tosylacetimidamide

The crude compound was isolated by silica column chromatography eluting with hexane/ethyl acetate (2:1,  $R_f$ : 0.29) to afford **11** as white solid (54 mg, 85% yield, a mixture of two isomers with a ratio 1:6, which is tentatively assigned as Z/E of the generated imino C=N double bond).  $^1\text{H}$  NMR (400 MHz,  $\text{CDCl}_3$ ):  $\delta$  7.90-7.88 (d, 2H), 7.31-7.29 (d, 2H), 7.15-7.12 (d, 2H), 6.93-6.91 (d, 2H), 5.24 (br, 1H), 4.24 (s, 2H), 3.83 (s, 3H), 3.24-3.18 (m, 2H), 2.44 (s, 3H), 1.46-1.39 (m, 2H), 0.79 (t, 3H);  $^{13}\text{C}$  NMR (100 MHz,  $\text{CDCl}_3$ ):  $\delta$  167.18, 159.52, 142.15, 141.04, 131.46, 129.77, 129.50, 129.27, 126.46, 124.80, 114.94, 55.42, 43.71, 39.02, 21.68, 21.59, 11.27; HRMS (FAB)  $m/z$  calcd. for  $\text{C}_{19}\text{H}_{24}\text{N}_2\text{O}_3\text{SNa}$  [ $M+\text{Na}$ ] $^+$  : 383.1405, found: 383.1403.

### ***N,N*-diisopropyl-2-phenyl-*N*-tosylacetimidamide**

The crude compound was isolated by silica column chromatography eluting with hexane/ethyl acetate (2:1,  $R_f$ : 0.40) to afford **12** as white solid (**A**: 12 mg, 18% yield, **B**: 66 mg, 97% yield).  $^1\text{H}$  NMR (400 MHz,  $\text{CDCl}_3$ ):  $\delta$  7.86-7.83 (d, 2H), 7.32-7.19 (m, 7H), 4.43 (s, 2H), 4.02 (sept, 1H), 2.41 (s, 3H), 1.41-1.40 (d, 6H), 0.92-0.88 (d, 6H);  $^{13}\text{C}$  NMR (100 MHz,  $\text{CDCl}_3$ ):  $\delta$  163.47, 141.61, 134.97, 129.08, 128.86, 128.03, 126.77, 126.25, 50.47, 48.07, 38.73, 21.48, 19.86. These spectroscopic data are consistent with those previously reported in the literature.<sup>10</sup>

### ***N*-benzyl-2-phenyl-*N*-tosylacetimidamide**

The crude compound was isolated by silica column chromatography eluting with hexane/ethyl acetate (1:1,  $R_f$ : 0.55) to afford **13** as white solid (**A**: 26 mg, 37% yield, **B**: 64 mg, 93% yield, a mixture of two isomers with a ratio 1:8, which is tentatively assigned as Z/E of the generated imino C=N double bond).  $^1\text{H}$  NMR (400 MHz,  $\text{CDCl}_3$ ):  $\delta$  7.86-7.83 (d, 2H), 7.41-7.33 (m, 3H), 7.30-7.21 (m, 6H), 7.09-7.06 (m, 2H), 5.49 (br, 1H), 4.43 (d, 2H), 4.38 (s, 2H), 2.44 (s, 3H);  $^{13}\text{C}$  NMR (100 MHz,  $\text{CDCl}_3$ ):  $\delta$  166.47, 142.23, 140.72, 136.49, 133.07, 130.10, 129.21, 128.77, 128.19, 127.78, 127.60, 126.42, 46.95, 39.74, 21.54. These spectroscopic data are consistent with those previously reported in the literature.<sup>10</sup>

### ***N*-methyl-*N*,2-diphenyl-*N*-tosylacetimidamide**

The crude compound was isolated by silica column chromatography eluting with hexane/ethyl acetate (1:1,  $R_f$ : 0.59) to afford **14** as white solid (**A**: 6 mg, 8% yield, **B**: 63 mg, 92% yield).  $^1\text{H}$  NMR (400 MHz,  $\text{CDCl}_3$ ):  $\delta$  7.91-7.89 (d, 2H), 7.32-7.20 (m, 5H), 7.12-7.09 (m, 3H), 6.84-6.78 (dd, 4H), 4.27 (s, 2H), 3.35 (s, 3H), 2.44 (s, 3H);  $^{13}\text{C}$  NMR (100 MHz,  $\text{CDCl}_3$ ):  $\delta$  166.48, 142.66, 142.10, 141.15, 134.76, 129.54, 129.18, 128.27, 127.31, 126.49, 126.45, 41.18, 37.73, 21.53. These spectroscopic data are consistent with those previously reported in the literature.<sup>10</sup>

### **2-phenyl-*N*-propyl-*N*-((2,4,6-triisopropylphenyl)sulfonyl)acetimidamide**

The crude compound was isolated by silica column chromatography eluting with hexane/ethyl acetate (2:1,  $R_f$ : 0.67) to afford **15** as white solid (**A**: 9 mg, 11% yield, **B**: 73 mg, 91% yield, a mixture of two isomers with a ratio 1:7, which is tentatively assigned as Z/E of the generated imino C=N double bond).  $^1\text{H}$  NMR (400 MHz,  $\text{CDCl}_3$ ):  $\delta$  7.38-7.34 (m, 3H), 7.20-7.12 (m, 4H), 5.04 (br, 1H), 4.48 (sept, 1H), 4.16 (s, 2H), 3.21 (sept, 1H), 2.93 (sept, 1H), 1.43-1.36 (m, 4H), 1.29-1.27 (dd, 18H), 0.76 (t, 3H);  $^{13}\text{C}$  NMR (100 MHz,  $\text{CDCl}_3$ ):  $\delta$  165.93, 151.65, 149.25, 136.80, 133.37, 130.12, 129.46, 128.90, 128.36, 128.15, 123.34, 53.53, 43.53, 34.19, 29.55, 24.86, 24.81, 23.76, 21.66, 11.15; HRMS (FAB)  $m/z$  calcd. for  $\text{C}_{26}\text{H}_{39}\text{N}_2\text{O}_2\text{S}$  [ $M+H$ ] $^+$  : 443.2732, found: 443.2731.

#### ***N*-(naphthalen-1-yl)-2-phenyl-*N*-tosylacetimidamide**

The crude compound was isolated by silica column chromatography eluting with hexane/ethyl acetate (2:1,  $R_f$ : 0.42) to afford **16** as white solid (**A**: 2 mg, 2% yield, **B**: 57 mg, 76% yield, a mixture of two isomers with a ratio 1:4, which is tentatively assigned as Z/E of the generated imino C=N double bond).  $^1\text{H}$  NMR (400 MHz,  $\text{CDCl}_3$ ):  $\delta$  10.06 (br, 1H), 7.95-7.88 (q, 4H), 7.68-7.65 (d, 1H), 7.56-7.50 (t, 1H), 7.49-7.46 (d, 1H), 7.43-7.39 (t, 1H), 7.37-7.34 (d, 2H), 7.16-7.14 (d, 1H), 7.08-7.05 (d, 1H), 7.01-6.99 (t, 2H), 6.75-6.72 (d, 2H), 3.49 (s, 2H), 2.49 (s, 3H);  $^{13}\text{C}$  NMR (100 MHz,  $\text{CDCl}_3$ ):  $\delta$  167.26, 143.30, 139.28, 134.44, 134.24, 132.41, 129.56, 129.39, 128.82, 128.45, 128.31, 127.64, 127.04, 127.01, 126.73, 125.92, 125.20, 122.10, 40.71, 21.72; HRMS (FAB)  $m/z$  calcd. for  $\text{C}_{25}\text{H}_{22}\text{N}_2\text{O}_2\text{SNa}$  [ $M+\text{Na}$ ] $^+$  : 437.1300, found: 437.1297.

#### ***N*-propyl-2-(p-tolyl)-*N*-tosylacetimidamide**

The crude compound was isolated by silica column chromatography eluting with hexane/ethyl acetate (2:1,  $R_f$ : 0.35) to afford **29** as white solid (53 mg, 89% yield, a mixture of two isomers with a ratio 1:6, which is tentatively assigned as Z/E of the generated imino C=N double bond).  $^1\text{H}$  NMR (400 MHz,  $\text{CDCl}_3$ ):  $\delta$  7.91-7.88 (d, 2H), 7.32-7.30 (d, 2H), 7.21-7.19 (d, 2H), 7.11-7.08 (d, 2H), 5.23 (br, 1H), 4.26 (s, 2H), 3.23-3.18 (m, 2H), 2.44 (s, 3H), 2.38 (s, 3H), 1.45-1.39 (m, 2H), 0.78 (t, 3H);  $^{13}\text{C}$  NMR (100 MHz,  $\text{CDCl}_3$ ):  $\delta$  167.04, 143.65, 142.18, 141.02, 139.29, 138.14, 130.25, 130.21, 129.82, 129.29, 126.57, 126.48, 43.74, 39.48, 21.68, 21.63, 21.24, 11.26; HRMS (FAB)  $m/z$  calcd. for  $\text{C}_{19}\text{H}_{24}\text{N}_2\text{O}_2\text{SNa}$  [ $M+\text{Na}$ ] $^+$  : 367.1456, found: 367.1454.

#### ***N*-isopropyl-2-phenyl-*N*-tosylacetimidamide**

The crude compound was isolated by silica column chromatography eluting with hexane/ethyl acetate (1:1,  $R_f$ : 0.45) to afford **30** as white solid (**A**: 23 mg, 39% yield, **B**: 56 mg, 94% yield, a mixture of two isomers with a ratio 1:6, which is tentatively assigned as Z/E of the generated imino C=N double bond).  $^1\text{H}$  NMR (400 MHz,  $\text{CDCl}_3$ ):  $\delta$  7.90-7.87 (d, 2H), 7.43-7.34 (m, 3H), 7.31-7.28 (dd, 2H), 7.22-7.20 (dd, 2H), 4.97 (br, 1H), 4.29 (s, 2H), 4.12 (sept, 1H), 2.44 (s, 3H), 1.03 (d, 6H);  $^{13}\text{C}$  NMR (100 MHz,  $\text{CDCl}_3$ ):

$\delta$  165.49, 142.06, 140.96, 133.28, 129.96 129.37, 129.19, 128.03, 126.30, 43.92, 39.68, 21.63, 21.50. These spectroscopic data are consistent with those previously reported in the literature.<sup>10</sup>

### ***N*-propyl-*N*-tosyl-2-(4-(trifluoromethyl)phenyl)acetimidamide**

The crude compound was isolated by silica column chromatography eluting with hexane/ethyl acetate (2:1,  $R_f$ : 0.53) to afford **31** as white solid (54 mg, 90% yield, a mixture of two isomers with a ratio 1:3 which is tentatively assigned as Z/E of the generated imino C=N double bond). <sup>1</sup>H NMR (400 MHz, CDCl<sub>3</sub>):  $\delta$  7.87-7.85 (d, 2H), 7.70-7.64 (d, 2H), 7.40-7.37 (d, 2H), 7.30 (s, 2H) 5.08 (br, 1H), 4.40 (s, 2H), 3.27-3.22 (m, 2H), 2.44 (s, 3H), 1.49-1.43 (m, 2H), 0.81 (t, 3H); <sup>13</sup>C NMR (100 MHz, CDCl<sub>3</sub>):  $\delta$  165.29, 142.40, 140.69, 137.73, 137.72, 130.35, 129.45, 129.30, 128.92, 126.39, 126.36, 126.33, 126.29, 126.25, 125.90, 125.86, 125.82, 43.96, 39.51, 21.72, 21.72, 11.31; HRMS (FAB)  $m/z$  calcd. for C<sub>19</sub>H<sub>21</sub>F<sub>3</sub>N<sub>2</sub>O<sub>2</sub>SNa [ $M+Na$ ]<sup>+</sup> : 421.1174, found: 421.1171.

## **References**

10. Bae, I.; Han, H.; Chang, S. Highly Efficient One-Pot Synthesis of *N*-Sulfonylamidines by Cu-Catalyzed Three-Component Coupling of Sulfonyl Azide, Alkyne, and Amine. *J. Am. Chem. Soc.* **2005**, *127*, 2038-2039.

### 3. Au-catalyzed hydroamination

**Typical procedure (A, heterogeneous catalyst):** To dioxane (0.18 mL) in a vessel was added  $\text{MOF}_{\text{AuCl}}$  (2.7 mg, 2.7  $\mu\text{mol}$ , 3 mol%), AgOTf (1.5 mg, 5.5  $\mu\text{mol}$ , 6 mol%), alkyne (0.091 mmol, 1 eq) under  $\text{N}_2$  atmosphere, and then, aniline (0.11 mmol, 1.2 eq) was added slowly to the above vessel. The reaction mixture was stirred at 70 °C for 5 h. The crude compound was isolated by silica column chromatography.

**Typical procedure (B, homogeneous catalyst):** To dioxane (0.18 mL) in a vessel was added IPrAuCl (Chloro[1,3-bis(2,6-diisopropylphenyl)imidazol-2-ylidene]silver(I)) (1.7 mg, 2.7  $\mu\text{mol}$ , 3 mol%), AgOTf (1.5 mg, 5.5  $\mu\text{mol}$ , 6 mol%), alkyne (0.091 mmol, 1 eq) under  $\text{N}_2$  atmosphere, and then, aniline (0.11 mmol, 1.2 eq) was added slowly to the above vessel. The reaction mixture was stirred at 70 °C for 5 h. The crude compound was isolated by silica column chromatography.

#### *N*-(1-phenylethylidene)aniline

The crude compound was isolated by silica column chromatography eluting with hexane/ethyl acetate (20:1,  $R_f$ : 0.44) to afford **17** as yellow solid (**A**: 33 mg, 93% yield, **B**: 35 mg, 99% yield).  $^1\text{H}$  NMR (400 MHz,  $\text{CDCl}_3$ ):  $\delta$  8.03-8.00 (m, 2H), 7.51-7.37 (m, 5H), 7.15-7.10 (m, 1H), 6.85-6.83 (m, 2H), 2.27 (s, 3H);  $^{13}\text{C}$  NMR (100 MHz,  $\text{CDCl}_3$ ):  $\delta$  165.59, 151.82, 139.62, 130.59, 129.08, 128.49, 127.30, 123.33, 119.50, 17.49. These spectroscopic data are consistent with those previously reported in the literature.<sup>11</sup>

#### 4-nitro-*N*-(1-phenylethylidene)aniline

The crude compound was isolated by silica column chromatography eluting with hexane/ethyl acetate (20:1,  $R_f$ : 0.21) to afford **18** as yellow solid (39 mg, 91% yield).  $^1\text{H}$  NMR (400 MHz,  $\text{CDCl}_3$ ):  $\delta$  8.27-8.25 (d, 2H), 8.00-7.99 (d, 2H), 7.52-7.49 (m, 3H), 6.92-6.89 (d, 2H), 2.28 (s, 3H);  $^{13}\text{C}$  NMR (100 MHz,  $\text{CDCl}_3$ ):  $\delta$  166.40, 157.89, 143.85, 138.36, 131.40, 128.67, 127.50, 125.26, 119.70, 18.00. These spectroscopic data are consistent with those previously reported in the literature.<sup>14</sup>

#### 4-methoxy-*N*-(1-phenylethylidene)aniline

The reaction mixture was stirred at room temperature for 5 h. The crude compound was isolated by silica column chromatography eluting with hexane/ethyl acetate (20:1,  $R_f$ : 0.24) to afford **19** as yellow solid (25 mg, 62% yield).  $^1\text{H}$  NMR (400 MHz,  $\text{CDCl}_3$ ):  $\delta$  8.01-7.98 (m, 2H), 7.48-7.46 (m, 3H), 6.96-6.93 (d, 2H), 6.80-6.78 (d, 2H), 3.84 (s, 3H), 2.29 (s, 3H);  $^{13}\text{C}$  NMR (100 MHz,  $\text{CDCl}_3$ ):  $\delta$  165.88, 156.08, 144.84, 139.83, 130.45, 128.45, 127.23, 120.88, 114.36, 55.58, 17.42. These spectroscopic data are consistent with those previously reported in the literature.<sup>13</sup>

### ***N*-(1-(4-nitrophenyl)ethylidene)aniline**

The crude compound was isolated by silica column chromatography eluting with hexane/ethyl acetate (20:1,  $R_f$ : 0.23) to afford **20** as white solid (10 mg, 32% yield).  $^1\text{H}$  NMR (400 MHz,  $\text{CDCl}_3$ ):  $\delta$  8.33-8.30 (d, 2H), 8.17-8.15 (d, 2H) 7.42-7.38 (m, 2H), 7.18-7.13 (m, 1H), 6.84-6.81 (m, 2H), 2.31 (s, 3H);  $^{13}\text{C}$  NMR (100 MHz,  $\text{CDCl}_3$ ):  $\delta$  163.81, 150.90, 149.12, 145.08, 129.25, 128.30, 124.11, 123.70, 119.22, 17.66. These spectroscopic data are consistent with those previously reported in the literature.<sup>12</sup>

### ***N*-(1-(4-methoxyphenyl)ethylidene)aniline**

The crude compound was isolated by silica column chromatography eluting with hexane/ethyl acetate (20:1,  $R_f$ : 0.26) to afford **21** as yellow solid (33 mg, 94% yield).  $^1\text{H}$  NMR (400 MHz,  $\text{CDCl}_3$ ):  $\delta$  7.93-7.90 (d, 2H), 7.39-7.34 (t, 2H) 7.12-7.08 (m, 1H), 7.13-7.10 (t, 1H), 6.99-6.97 (m, 2H), 3.89 (s, 3H), 2.23 (s, 3H);  $^{13}\text{C}$  NMR (100 MHz,  $\text{CDCl}_3$ ):  $\delta$  164.70, 161.69, 151.92, 132.28, 129.03, 128.98, 123.17, 119.76, 113.73, 55.51, 17.29. These spectroscopic data are consistent with those previously reported in the literature.<sup>13</sup>

### **4-(*tert*-butyl)-*N*-(1-phenylethylidene)aniline**

The crude compound was isolated by silica column chromatography eluting with hexane/ethyl acetate (20:1,  $R_f$ : 0.42) to afford **22** as yellow solid (**A**: 11 mg, 24% yield, **B**: 44 mg, 96% yield).  $^1\text{H}$  NMR (400 MHz,  $\text{CDCl}_3$ ):  $\delta$  8.03-7.99 (m, 2H), 7.48-7.46 (m, 3H), 7.42-7.39 (d, 2H), 6.80-6.76 (d, 2H), 2.29 (s, 3H), 1.38 (s, 3H);  $^{13}\text{C}$  NMR (100 MHz,  $\text{CDCl}_3$ ):  $\delta$  165.43, 149.03, 146.15, 139.79, 130.47, 128.46, 127.30, 125.85, 119.23, 34.42, 31.65, 17.50. These spectroscopic data are consistent with those previously reported in the literature.<sup>13</sup>

### **2,6-diisopropyl-*N*-(1-phenylethylidene)aniline**

The crude compound was isolated by silica column chromatography eluting with hexane/ethyl acetate (20:1,  $R_f$ : 0.56) to afford **23** as yellow solid (**A**: 11 mg, 21% yield, **B**: 45 mg, 88% yield).  $^1\text{H}$  NMR (400 MHz,  $\text{CDCl}_3$ ):  $\delta$  8.08-8.06 (m, 2H), 7.52-7.50 (m, 3H), 7.19-7.08 (m, 3H), 2.78 (sept, 2H), 2.13 (s, 3H), 1.17 (t, 12H);  $^{13}\text{C}$  NMR (100 MHz,  $\text{CDCl}_3$ ):  $\delta$  164.93, 146.86, 139.26, 136.24, 130.52, 128.54, 127.27, 123.45, 123.08, 28.35, 23.27, 23.08, 18.22. These spectroscopic data are consistent with those previously reported in the literature.<sup>15</sup>

### ***N*-(1-phenylethylidene)naphthalen-1-amine**

The crude compound was isolated by silica column chromatography eluting with hexane/ethyl acetate (20:1,  $R_f$ : 0.38) to afford **24** as yellow solid (**A**: 9 mg, 20% yield, **B**: 43 mg, 97% yield).  $^1\text{H}$  NMR (400



MHz, CDCl<sub>3</sub>):  $\delta$  8.18-8.16 (m, 2H), 7.91-7.89 (d, 1H), 7.84-7.81 (dd, 1H), 7.66-7.63 (d, 1H), 7.60-7.42 (m, 6H), 6.84 (dd, 1H), 2.25 (s, 3H); <sup>13</sup>C NMR (100 MHz, CDCl<sub>3</sub>):  $\delta$  166.66, 148.03, 139.36, 134.34, 130.83, 128.60, 128.11, 127.46, 126.24, 126.02, 125.54, 123.71, 123.41, 113.65, 17.83. These spectroscopic data are consistent with those previously reported in the literature.<sup>14</sup>

#### ***N*-(1-(*p*-tolyl)ethylidene)aniline**

The crude compound was isolated by silica column chromatography eluting with hexane/ethyl acetate (20:1, R<sub>f</sub>: 0.48) to afford **32** as yellow solid (30 mg, 92% yield). <sup>1</sup>H NMR (400 MHz, CDCl<sub>3</sub>):  $\delta$  7.93-7.90 (d, 2H), 7.39-7.35 (t, 2H) 7.29-7.27 (t, 2H), 7.13-7.10 (t, 1H), 6.86-6.84 (d, 2H), 2.44 (s, 3H), 2.26 (s, 3H); <sup>13</sup>C NMR (100 MHz, CDCl<sub>3</sub>):  $\delta$  166.06, 151.29, 141.20, 136.57, 129.26, 129.11, 127.47, 123.55, 119.88, 21.54, 17.57. These spectroscopic data are consistent with those previously reported in the literature.<sup>13</sup>

#### ***N*-(1-(4-(trifluoromethyl)phenyl)ethylidene)aniline**

The crude compound was isolated by silica column chromatography eluting with hexane/ethyl acetate (20:1, R<sub>f</sub>: 0.36) to afford **33** as yellow solid (17 mg, 53% yield). <sup>1</sup>H NMR (400 MHz, CDCl<sub>3</sub>):  $\delta$  8.12-8.10 (d, 2H), 7.74-7.71 (d, 2H) 7.42-7.38 (m, 2H), 7.17-7.12 (m, 1H), 6.84-6.81 (m, 2H), 2.30 (s, 3H); <sup>13</sup>C NMR (100 MHz, CDCl<sub>3</sub>):  $\delta$  164.48, 151.22, 142.75, 132.43, 132.11, 129.20, 127.69, 125.53, 125.49, 125.45, 125.42, 123.82, 119.34, 17.58. These spectroscopic data are consistent with those previously reported in the literature.<sup>12</sup>

#### ***N*-(1-phenylethylidene)-4-(trifluoromethyl)aniline**

The crude compound was isolated by silica column chromatography eluting with hexane/ethyl acetate (20:1, R<sub>f</sub>: 0.40) to afford **34** as yellow solid (43 mg, 90% yield). <sup>1</sup>H NMR (400 MHz, CDCl<sub>3</sub>):  $\delta$  8.01-8.00 (d, 2H), 7.64-7.62 (d, 2H), 7.51-7.47 (m, 3H), 6.92-6.90 (d, 2H), 2.27 (s, 3H); <sup>13</sup>C NMR (100 MHz, CDCl<sub>3</sub>):  $\delta$  166.62, 154.69, 138.84, 131.17, 128.64, 127.47, 126.49, 126.46, 126.42, 126.38, 125.97, 125.79, 125.47, 123.27, 119.67, 17.79. These spectroscopic data are consistent with those previously reported in the literature.<sup>14</sup>

#### **4-methyl-*N*-(1-phenylethylidene)aniline**

The crude compound was isolated by silica column chromatography eluting with hexane/ethyl acetate (20:1, R<sub>f</sub>: 0.24) to afford **35** as yellow solid (30 mg, 80% yield). <sup>1</sup>H NMR (400 MHz, CDCl<sub>3</sub>):  $\delta$  8.01-7.98 (m, 2H), 7.49-7.45 (m, 3H), 7.19-7.17 (d, 2H), 6.75-6.73 (d, 2H), 2.38 (s, 3H), 2.27(s, 3H); <sup>13</sup>C NMR (100 MHz, CDCl<sub>3</sub>):  $\delta$  165.85, 148.96, 139.69, 132.86, 130.57, 129.65, 128.49, 127.33, 119.61, 21.00, 17.49. These spectroscopic data are consistent with those previously reported in the literature.<sup>13</sup>

## References

11. Nagata, T.; Adachi, Y.; Obora, Y. Thiolate-Protected  $\text{Au}_{25}(\text{SC}_2\text{H}_4\text{Ph})_{18}$  Nanoclusters as a Catalyst for Intermolecular Hydroamination of Terminal Alkynes. *Synlett* **2018**, 29, 2655-2659.
12. Schramm, Y.; Barrios-Landeros, F.; Pfaltz, A. Discovery of an iridacycle catalyst with improved reactivity and enantioselectivity in the hydrogenation of dialkyl ketimines. *Chem. Sci.* **2013**, 4, 2760-2766.
13. Kumaran, E.; Leong, W. K. Rhodium(III)-Catalyzed Hydroamination of Aromatic Terminal Alkynes with Anilines. *Organometallics* **2012**, 31, 1068–1072.
14. Sarma, R.; Prajapati, D. Indium catalyzed tandem hydroamination/hydroalkylation of terminal alkynes. *Chem. Commun.* **2011**, 47, 9525–9527.
15. Bawari, D.; Goswami, B.; Sabari, V. R.; Thakur, S. K.; Varun Tej, R. V.; Roy Choudhury, A.; Singh, S. Neutral and cationic cyclic (alkyl)(amino)carbene mercury [cAAC–Hg(ii)] complexes: scope of hydroamination of alkynes with organomercury compounds. *Dalton Trans.* **2018**, 47, 6274,

## Single crystal X-ray structure determination

### Summary of crystal data and structure refinement for MOF<sub>CuCl</sub>

|                                   |                                                                                                                  |
|-----------------------------------|------------------------------------------------------------------------------------------------------------------|
| Empirical formula                 | C <sub>123</sub> H <sub>126</sub> Cl <sub>3</sub> Cu <sub>3</sub> N <sub>7</sub> O <sub>16</sub> Zn <sub>4</sub> |
| Formula weight                    | 2516.75                                                                                                          |
| Temperature                       | 100(2) K                                                                                                         |
| Wavelength                        | 0.71073 Å                                                                                                        |
| Crystal system                    | Monoclinic                                                                                                       |
| Space group                       | C2/c                                                                                                             |
| Unit cell dimensions              | a = 31.2209(16) Å      α = 90°.<br>b = 46.176(3) Å      β = 101.183(2)°.<br>c = 28.6618(16) Å      γ = 90°.      |
| Volume                            | 40536(4) Å <sup>3</sup>                                                                                          |
| Z                                 | 8                                                                                                                |
| Density (calculated)              | 0.825 Mg/m <sup>3</sup>                                                                                          |
| Absorption coefficient            | 0.852 mm <sup>-1</sup>                                                                                           |
| F(000)                            | 10392                                                                                                            |
| Crystal size                      | 0.300 x 0.300 x 0.200 mm <sup>3</sup>                                                                            |
| Theta range for data collection   | 0.987 to 24.849°.                                                                                                |
| Index ranges                      | -36 ≤ h ≤ 31, -45 ≤ k ≤ 54, -33 ≤ l ≤ 33                                                                         |
| Reflections collected             | 173590                                                                                                           |
| Independent reflections           | 34821 [R(int) = 0.0581]                                                                                          |
| Completeness to theta = 24.849°   | 99.3 %                                                                                                           |
| Absorption correction             | Semi-empirical from equivalents                                                                                  |
| Max. and min. transmission        | 0.848 and 0.754                                                                                                  |
| Refinement method                 | Full-matrix least-squares on F <sup>2</sup>                                                                      |
| Data / restraints / parameters    | 34821 / 1296 / 1405                                                                                              |
| Goodness-of-fit on F <sup>2</sup> | 1.024                                                                                                            |
| Final R indices [I > 2σ(I)]       | R <sub>1</sub> = 0.0936, wR <sub>2</sub> = 0.2622                                                                |
| R indices (all data)              | R <sub>1</sub> = 0.1419, wR <sub>2</sub> = 0.3130                                                                |
| Largest diff. peak and hole       | 1.239 and -1.601 e.Å <sup>-3</sup>                                                                               |

### Summary of crystal data and structure refinement for MOF<sub>CuBr</sub>

|                   |                                                                                                                  |
|-------------------|------------------------------------------------------------------------------------------------------------------|
| Empirical formula | C <sub>126</sub> H <sub>132</sub> Br <sub>3</sub> Cu <sub>3</sub> N <sub>7</sub> O <sub>15</sub> Zn <sub>4</sub> |
| Formula weight    | 2676.21                                                                                                          |
| Temperature       | 100(2) K                                                                                                         |
| Wavelength        | 0.70000 Å                                                                                                        |

|                                   |                                                   |                            |
|-----------------------------------|---------------------------------------------------|----------------------------|
| Crystal system                    | Monoclinic                                        |                            |
| Space group                       | C2/c                                              |                            |
| Unit cell dimensions              | a = 31.173(6) Å                                   | $\alpha = 90^\circ$ .      |
|                                   | b = 45.755(9) Å                                   | $\beta = 99.98(3)^\circ$ . |
|                                   | c = 28.545(6) Å                                   | $\gamma = 90^\circ$ .      |
| Volume                            | 40098(14) Å <sup>3</sup>                          |                            |
| Z                                 | 8                                                 |                            |
| Density (calculated)              | 0.887 Mg/m <sup>3</sup>                           |                            |
| Absorption coefficient            | 1.326 mm <sup>-1</sup>                            |                            |
| F(000)                            | 10952                                             |                            |
| Crystal size                      | 0.200 x 0.200 x 0.200 mm <sup>3</sup>             |                            |
| Theta range for data collection   | 1.427 to 24.941°.                                 |                            |
| Index ranges                      | -37 ≤ h ≤ 37, -55 ≤ k ≤ 53, -34 ≤ l ≤ 34          |                            |
| Reflections collected             | 64931                                             |                            |
| Independent reflections           | 36032 [R(int) = 0.0526]                           |                            |
| Completeness to theta = 24.835°   | 98.1 %                                            |                            |
| Absorption correction             | Empirical                                         |                            |
| Max. and min. transmission        | 1.000 and 0.839                                   |                            |
| Refinement method                 | Full-matrix least-squares on F <sup>2</sup>       |                            |
| Data / restraints / parameters    | 36032 / 1303 / 1424                               |                            |
| Goodness-of-fit on F <sup>2</sup> | 1.020                                             |                            |
| Final R indices [I > 2sigma(I)]   | R <sub>1</sub> = 0.1136, wR <sub>2</sub> = 0.3243 |                            |
| R indices (all data)              | R <sub>1</sub> = 0.1682, wR <sub>2</sub> = 0.3494 |                            |
| Largest diff. peak and hole       | 1.196 and -1.284 e.Å <sup>-3</sup>                |                            |

### Summary of crystal data and structure refinement for MOF<sub>CuI</sub>

|                        |                                                                                                                 |                |  |
|------------------------|-----------------------------------------------------------------------------------------------------------------|----------------|--|
| Empirical formula      | C <sub>123</sub> H <sub>126</sub> Cu <sub>3</sub> I <sub>3</sub> N <sub>7</sub> O <sub>16</sub> Zn <sub>4</sub> |                |  |
| Formula weight         | 2791.10                                                                                                         |                |  |
| Temperature            | 100(2) K                                                                                                        |                |  |
| Wavelength             | 0.70000 Å                                                                                                       |                |  |
| Crystal system         | Monoclinic                                                                                                      |                |  |
| Space group            | C2/c                                                                                                            |                |  |
| Unit cell dimensions   | a = 31.335(6) Å                                                                                                 | α= 90°.        |  |
|                        | b = 46.201(9) Å                                                                                                 | β= 101.00(3)°. |  |
|                        | c = 28.670(6) Å                                                                                                 | γ= 90°.        |  |
| Volume                 | 40743(15) Å <sup>3</sup>                                                                                        |                |  |
| Z                      | 8                                                                                                               |                |  |
| Density (calculated)   | 0.910 Mg/m <sup>3</sup>                                                                                         |                |  |
| Absorption coefficient | 1.157 mm <sup>-1</sup>                                                                                          |                |  |

|                                   |                                                   |
|-----------------------------------|---------------------------------------------------|
| F(000)                            | 11256                                             |
| Crystal size                      | 0.300 x 0.300 x 0.200 mm <sup>3</sup>             |
| Theta range for data collection   | 1.456 to 29.866°.                                 |
| Index ranges                      | -44≤h≤44, -65≤k≤65, -40≤l≤40                      |
| Reflections collected             | 112334                                            |
| Independent reflections           | 60369 [R(int) = 0.0475]                           |
| Completeness to theta = 24.835°   | 98.4 %                                            |
| Absorption correction             | Empirical                                         |
| Max. and min. transmission        | 1.000 and 0.875                                   |
| Refinement method                 | Full-matrix least-squares on F <sup>2</sup>       |
| Data / restraints / parameters    | 60369 / 1224 / 1425                               |
| Goodness-of-fit on F <sup>2</sup> | 1.020                                             |
| Final R indices [I>2sigma(I)]     | R <sub>1</sub> = 0.1282, wR <sub>2</sub> = 0.3383 |
| R indices (all data)              | R <sub>1</sub> = 0.1657, wR <sub>2</sub> = 0.3546 |
| Largest diff. peak and hole       | 1.519 and -2.238 e.Å <sup>-3</sup>                |

### Summary of crystal data and structure refinement for MOF<sub>AuCl</sub>

|                                 |                                                                                                                  |                 |
|---------------------------------|------------------------------------------------------------------------------------------------------------------|-----------------|
| Empirical formula               | C <sub>123</sub> H <sub>124</sub> Au <sub>3</sub> Cl <sub>3</sub> N <sub>7</sub> O <sub>16</sub> Zn <sub>4</sub> |                 |
| Formula weight                  | 2915.01                                                                                                          |                 |
| Temperature                     | 100(2) K                                                                                                         |                 |
| Wavelength                      | 0.70000 Å                                                                                                        |                 |
| Crystal system                  | Monoclinic                                                                                                       |                 |
| Space group                     | C2/c                                                                                                             |                 |
| Unit cell dimensions            | a = 31.303(6) Å                                                                                                  | α = 90°.        |
|                                 | b = 46.242(9) Å                                                                                                  | β = 101.08(3)°. |
|                                 | c = 28.703(6) Å                                                                                                  | γ = 90°.        |
| Volume                          | 40773(15) Å <sup>3</sup>                                                                                         |                 |
| Z                               | 8                                                                                                                |                 |
| Density (calculated)            | 0.950 Mg/m <sup>3</sup>                                                                                          |                 |
| Absorption coefficient          | 2.496 mm <sup>-1</sup>                                                                                           |                 |
| F(000)                          | 11576                                                                                                            |                 |
| Crystal size                    | 0.200 x 0.200 x 0.200 mm <sup>3</sup>                                                                            |                 |
| Theta range for data collection | 1.456 to 29.873°.                                                                                                |                 |
| Index ranges                    | -44≤h≤44, -64≤k≤65, -40≤l≤40                                                                                     |                 |
| Reflections collected           | 115768                                                                                                           |                 |
| Independent reflections         | 61044 [R(int) = 0.0276]                                                                                          |                 |
| Completeness to theta = 24.835° | 99.6 %                                                                                                           |                 |
| Absorption correction           | Empirical                                                                                                        |                 |
| Max. and min. transmission      | 1.000 and 0.805                                                                                                  |                 |

|                                      |                                    |
|--------------------------------------|------------------------------------|
| Refinement method                    | Full-matrix least-squares on $F^2$ |
| Data / restraints / parameters       | 61044 / 1453 / 1405                |
| Goodness-of-fit on $F^2$             | 1.119                              |
| Final R indices [ $I > 2\sigma(I)$ ] | $R_1 = 0.0921$ , $wR_2 = 0.2908$   |
| R indices (all data)                 | $R_1 = 0.1053$ , $wR_2 = 0.3056$   |
| Largest diff. peak and hole          | 2.388 and -4.858 e.Å <sup>-3</sup> |

## $^1\text{H}$ and $^{13}\text{C}$ NMR spectra

$^1\text{H}$  NMR spectrum of 1,3-bis(4'-carboxy-3,5-diisopropyl-[1,1'-biphenyl]-4-yl)-2,3-dihydro-1H-imidazol-2-yl copper(I) chloride (NHC-CuCl)

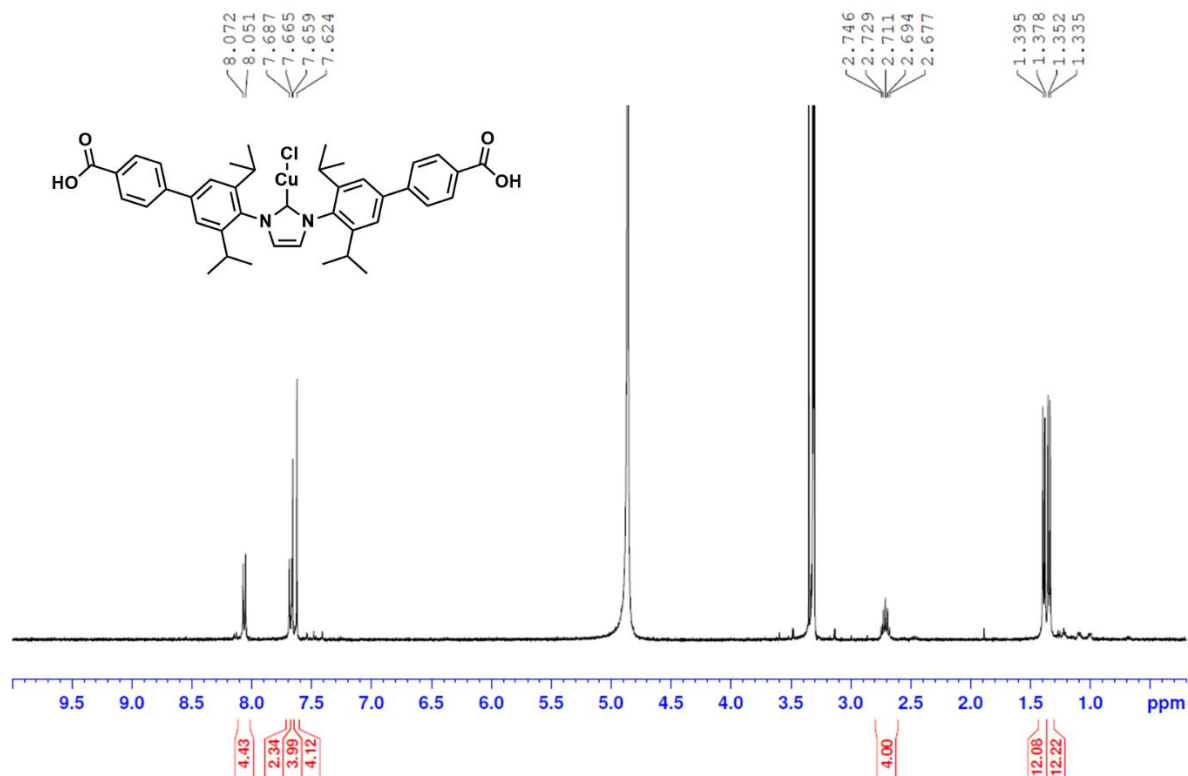

$^{13}\text{C}$  NMR spectrum of 1,3-bis(4'-carboxy-3,5-diisopropyl-[1,1'-biphenyl]-4-yl)-2,3-dihydro-1H-imidazol-2-yl copper(I) chloride (NHC-CuCl)

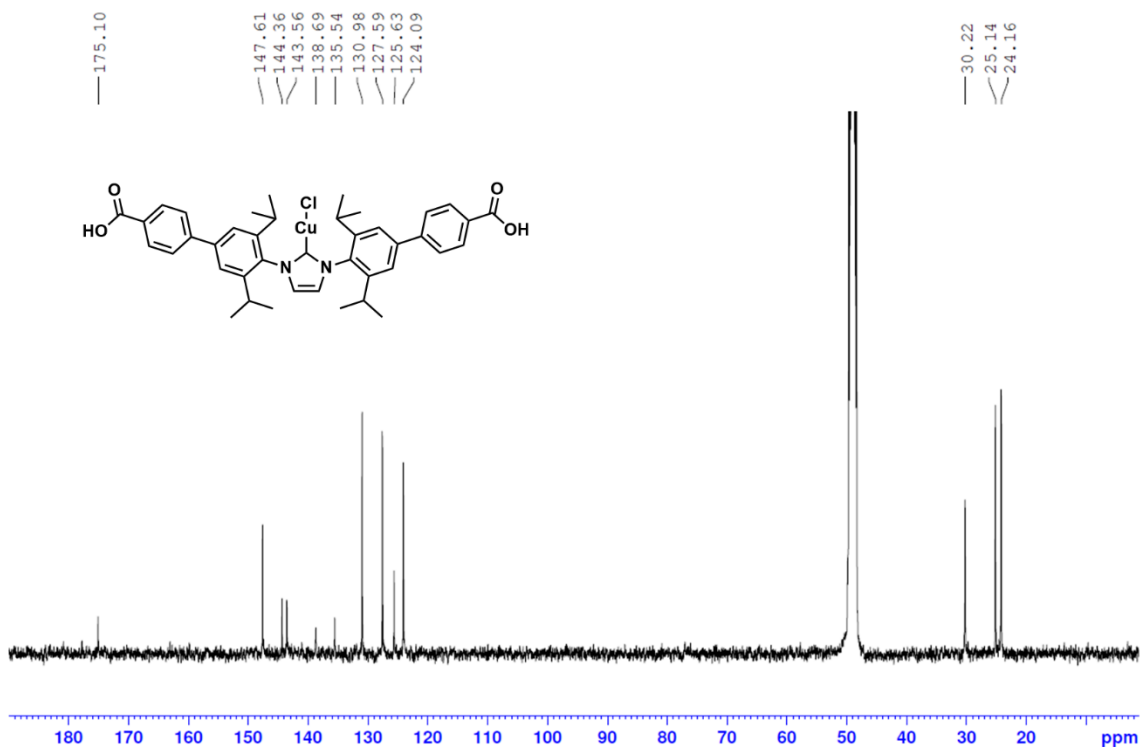

**$^1\text{H}$  NMR spectrum of 1,3-bis(4'-carboxy-3,5-diisopropyl-[1,1'-biphenyl]-4-yl)-2,3-dihydro-1H-imidazol-2-yl copper(I) bromide (NHC-CuBr)**

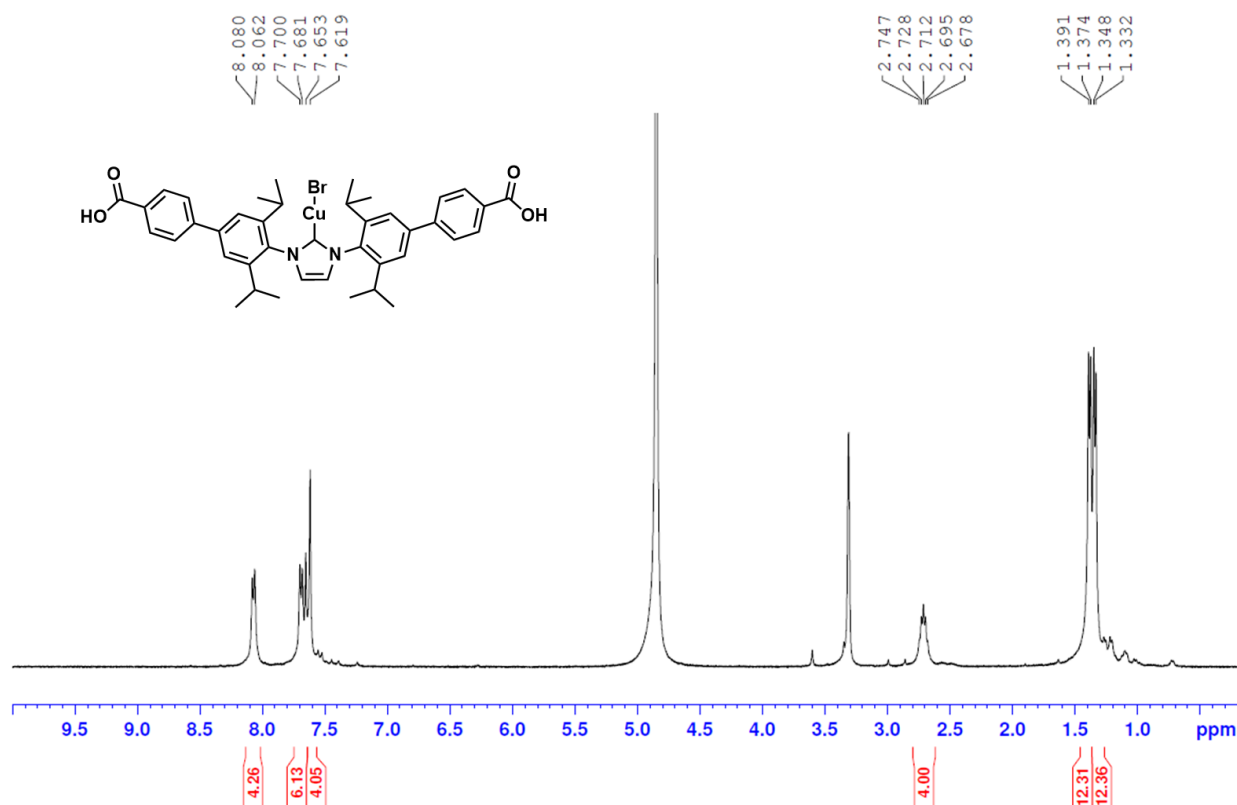

**$^{13}\text{C}$  NMR spectrum of 1,3-bis(4'-carboxy-3,5-diisopropyl-[1,1'-biphenyl]-4-yl)-2,3-dihydro-1H-imidazol-2-yl copper(I) bromide (NHC-CuBr)**

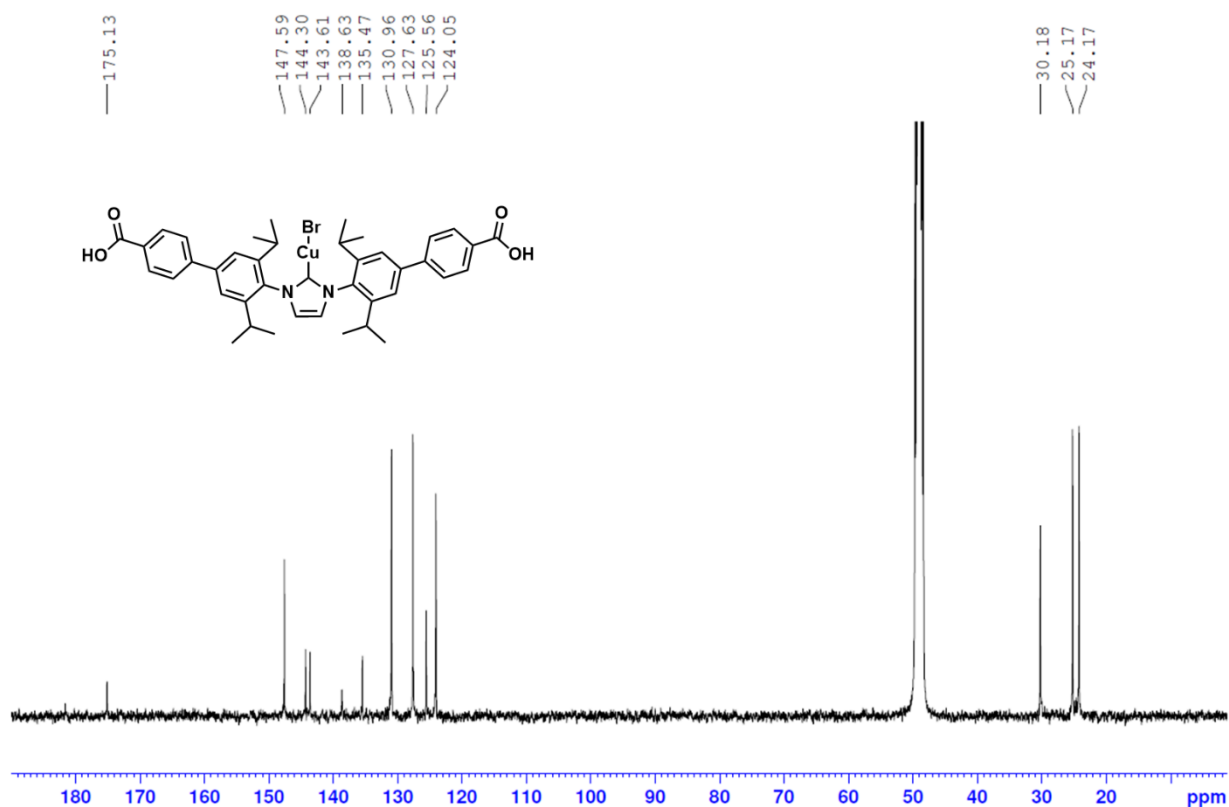



**$^1\text{H}$  NMR spectrum of 1,3-bis(4'-carboxy-3,5-diisopropyl-[1,1'-biphenyl]-4-yl)-2,3-dihydro-1H-imidazol-2-yl copper(I) iodide (NHC-CuI)**

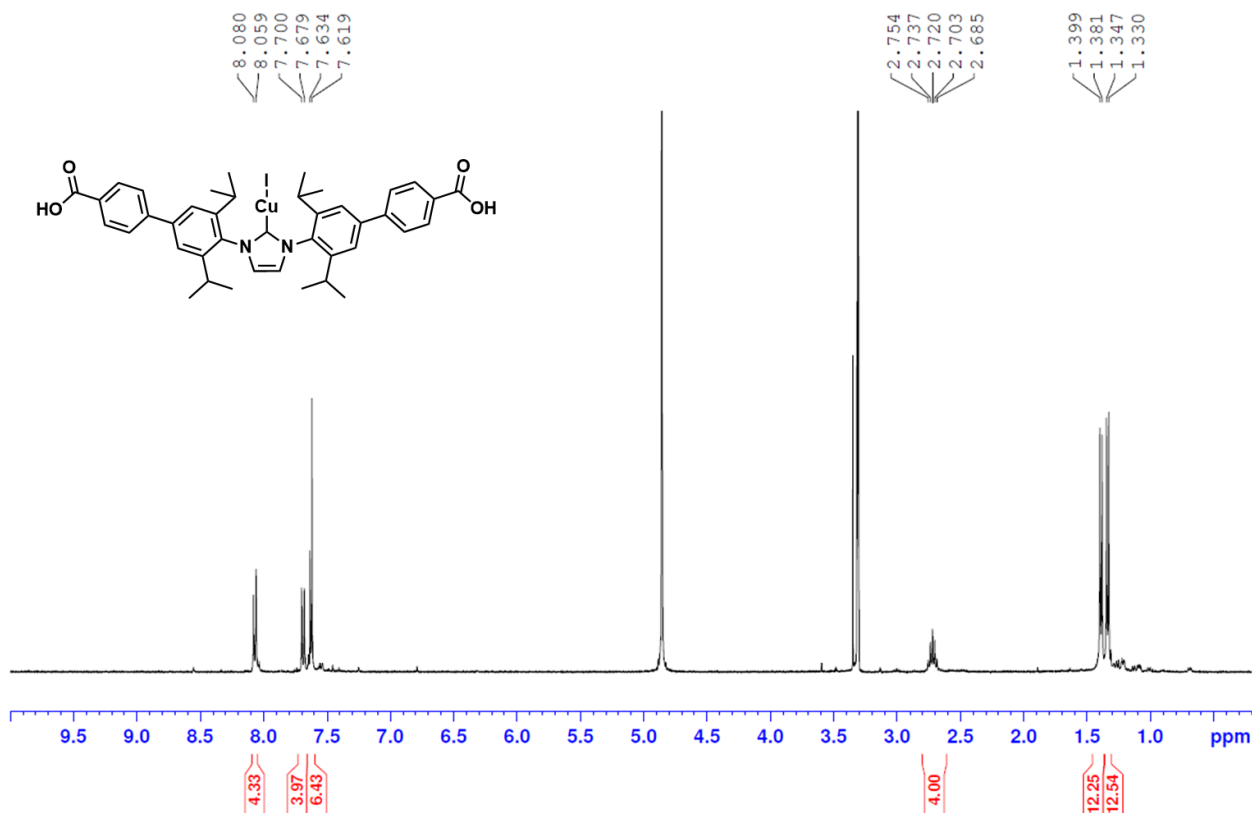

**$^{13}\text{C}$  NMR spectrum of 1,3-bis(4'-carboxy-3,5-diisopropyl-[1,1'-biphenyl]-4-yl)-2,3-dihydro-1H-imidazol-2-yl copper(I) iodide (NHC-CuI)**

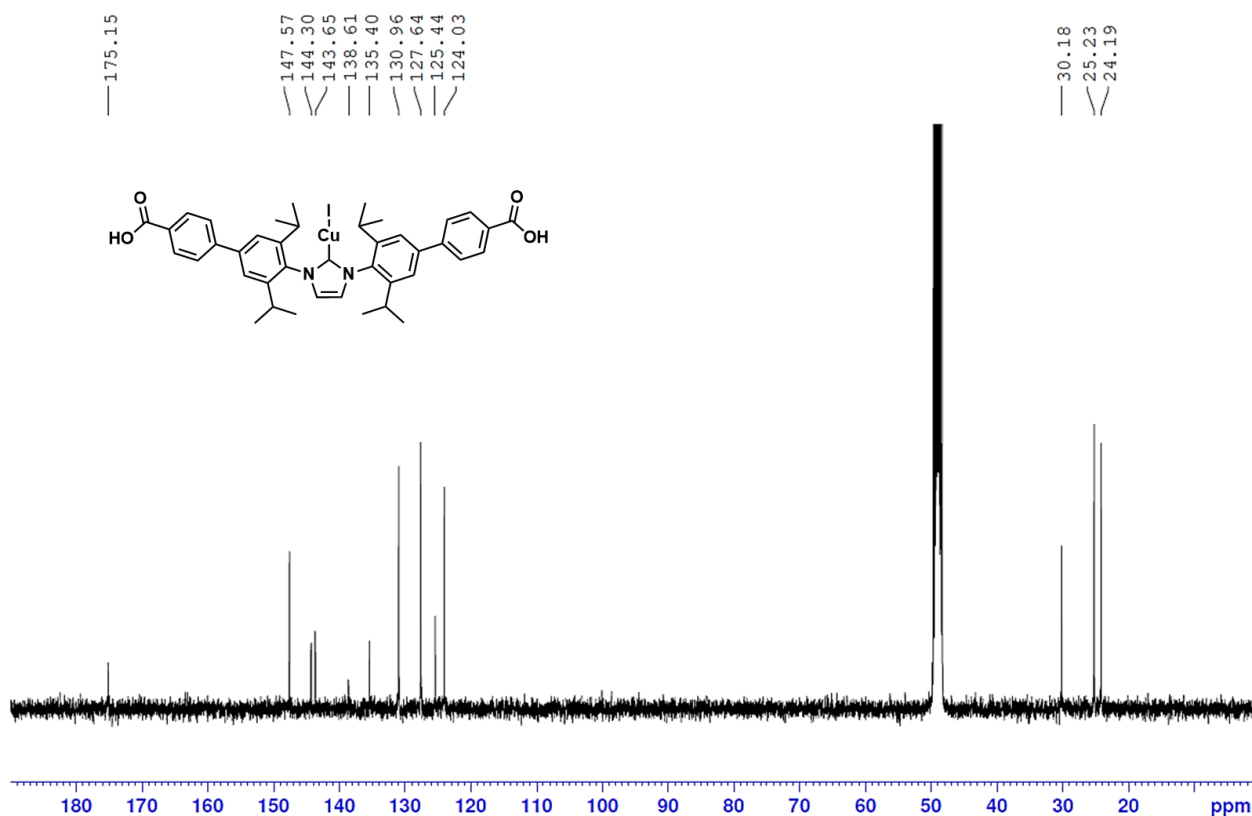

**<sup>1</sup>H NMR spectrum of 1,3-bis(4'-carboxy-3,5-diisopropyl-[1,1'-biphenyl]-4-yl)-2,3-dihydro-1H-imidazol-2-yl gold(I) chloride (NHC-AuCl)**

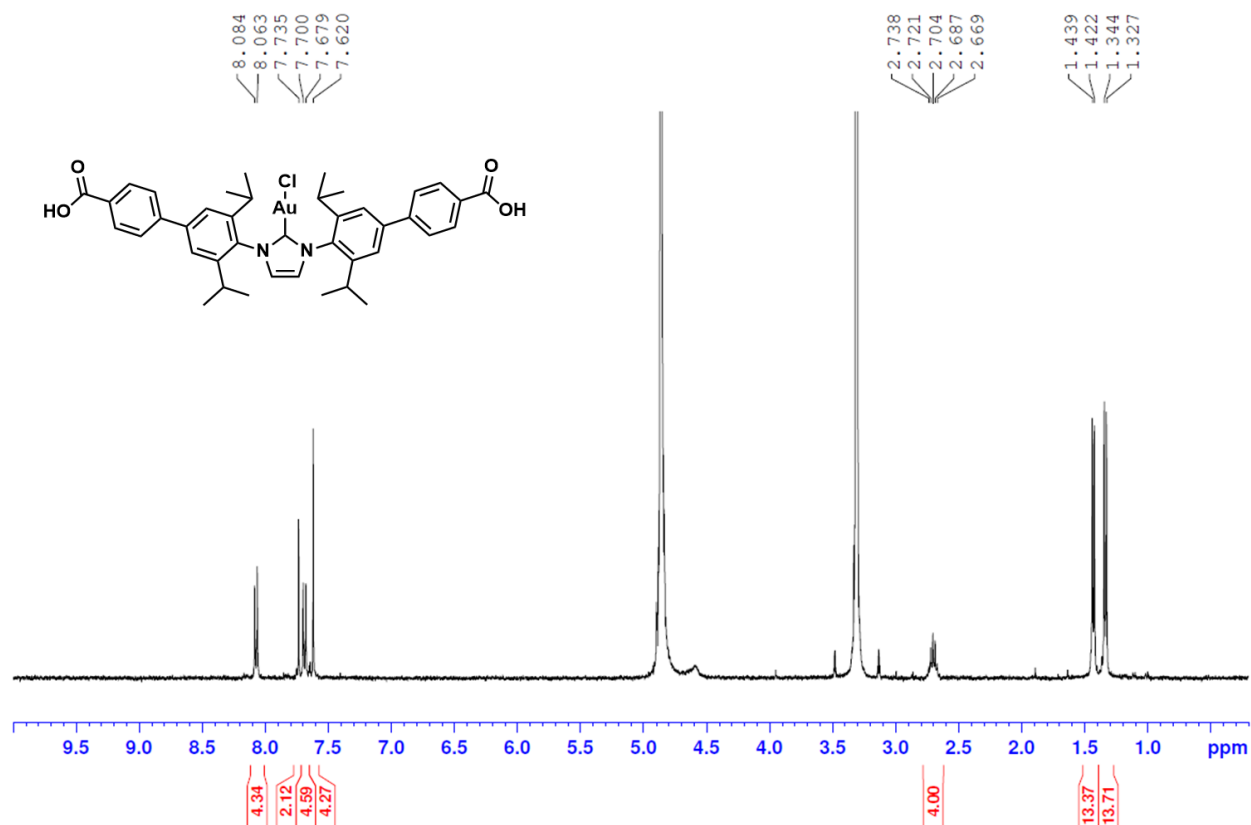

**<sup>13</sup>C NMR spectrum of 1,3-bis(4'-carboxy-3,5-diisopropyl-[1,1'-biphenyl]-4-yl)-2,3-dihydro-1H-imidazol-2-yl gold(I) chloride (NHC-AuCl)**

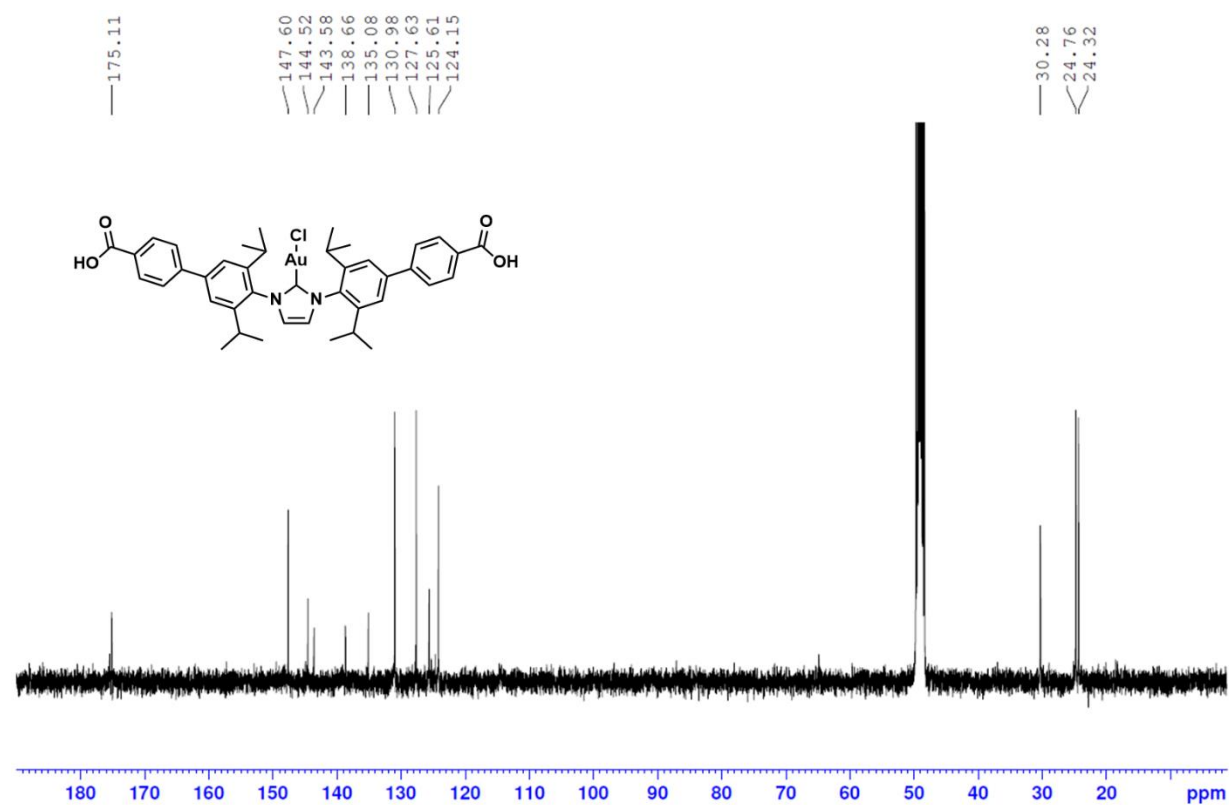

**<sup>1</sup>H NMR spectrum of (1,3-bis(4'-carboxy-3,5-diisopropyl-[1,1'-biphenyl]-4-yl)-2,3-dihydro-1H-imidazol-2-yl)silver(I) chloride**

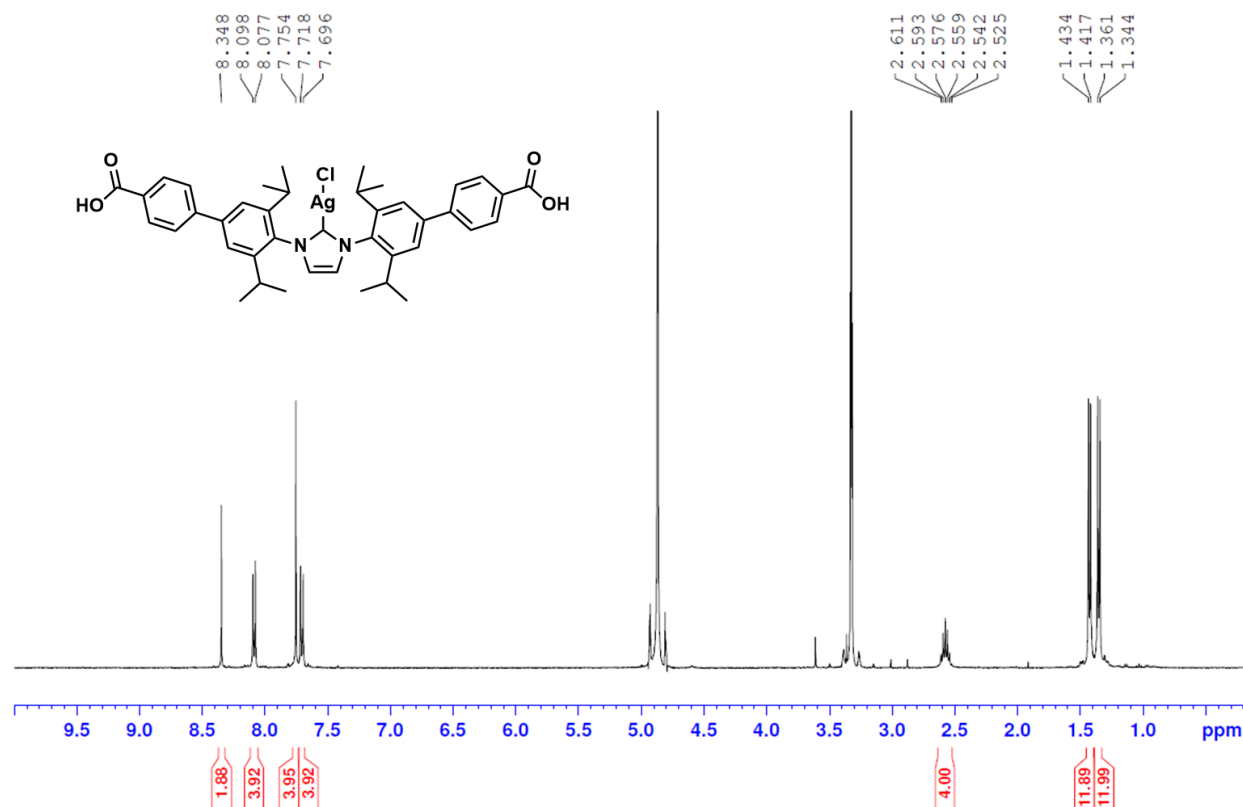

**<sup>13</sup>C NMR spectrum of (1,3-bis(4'-carboxy-3,5-diisopropyl-[1,1'-biphenyl]-4-yl)-2,3-dihydro-1H-imidazol-2-yl)silver(I) chloride**

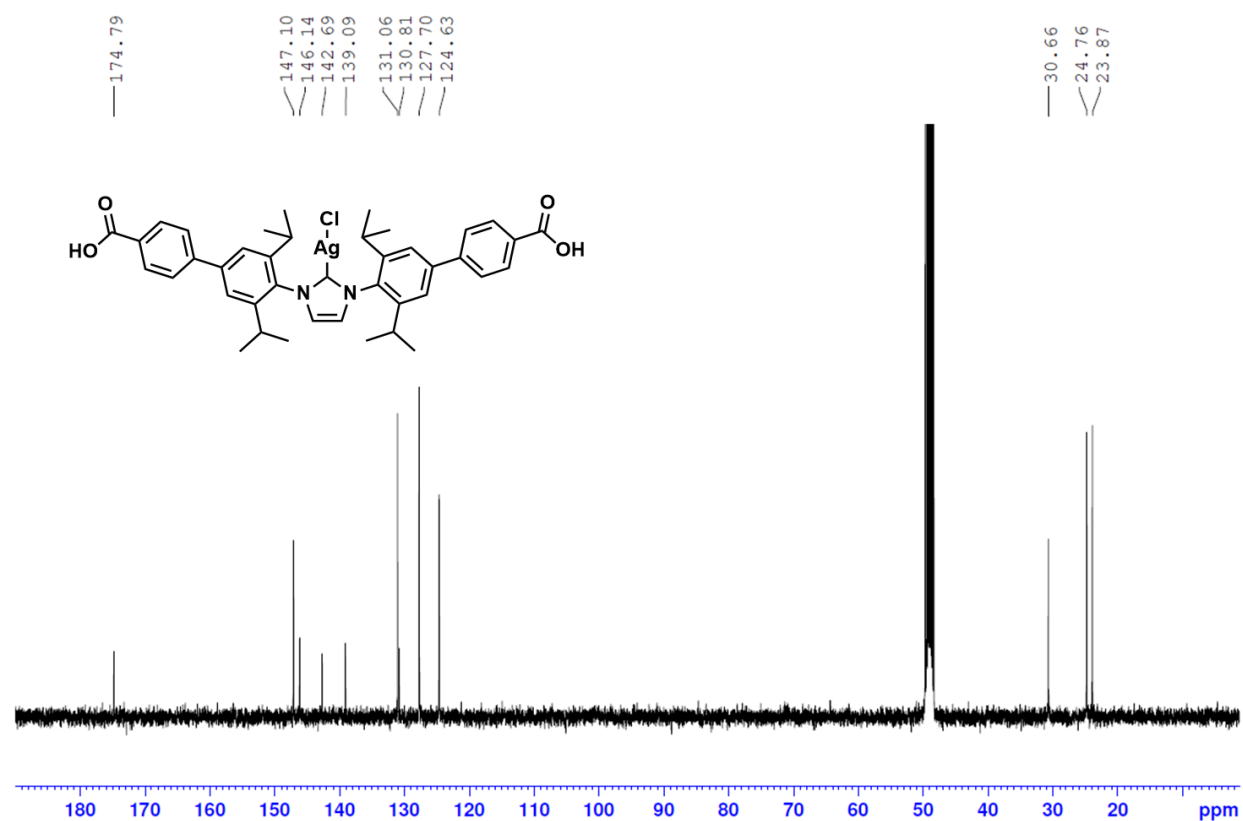

**<sup>1</sup>H NMR spectrum of Allyl(1,3-bis(4'-carboxy-3,5-diisopropyl-[1,1'-biphenyl]-4-yl)-2,3-dihydro-1H-imidazol-2-yl)Chloropalladium(II)**

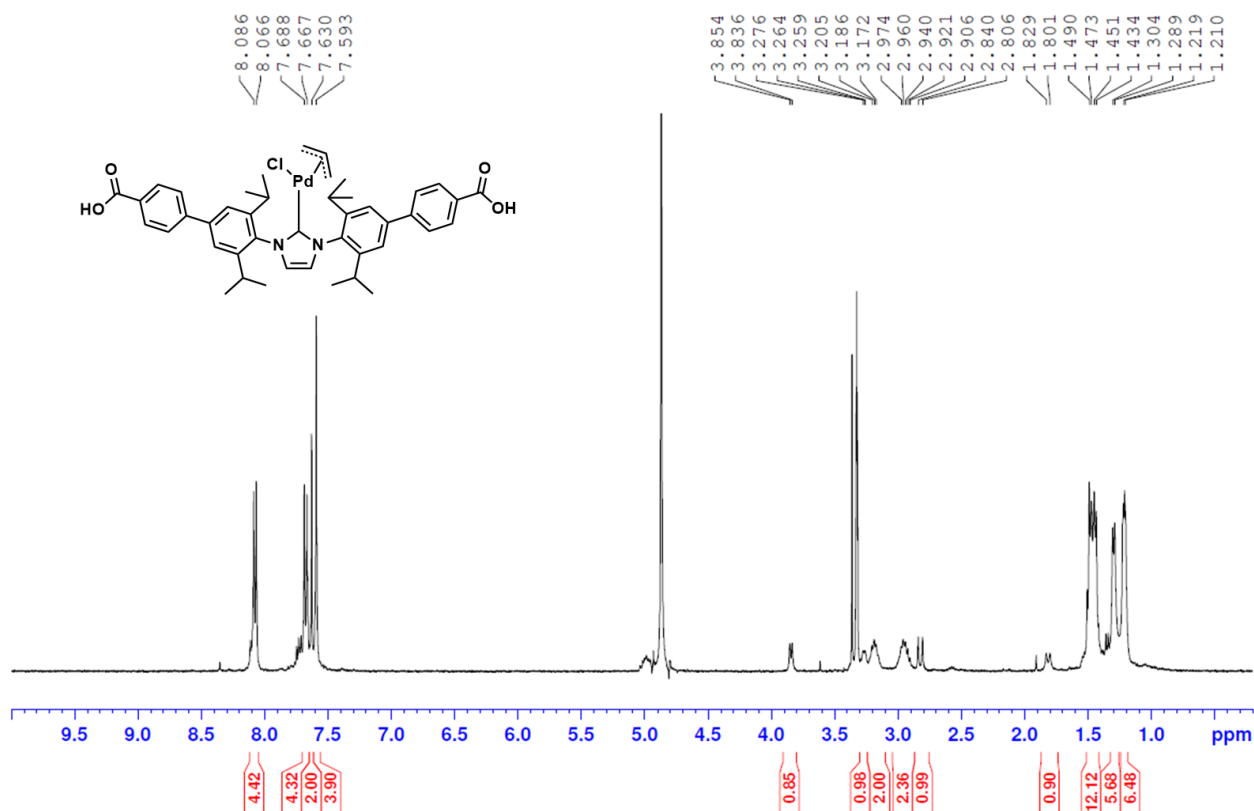

**<sup>13</sup>C NMR spectrum of Allyl(1,3-bis(4'-carboxy-3,5-diisopropyl-[1,1'-biphenyl]-4-yl)-2,3-dihydro-1H-imidazol-2-yl)Chloropalladium(II)**

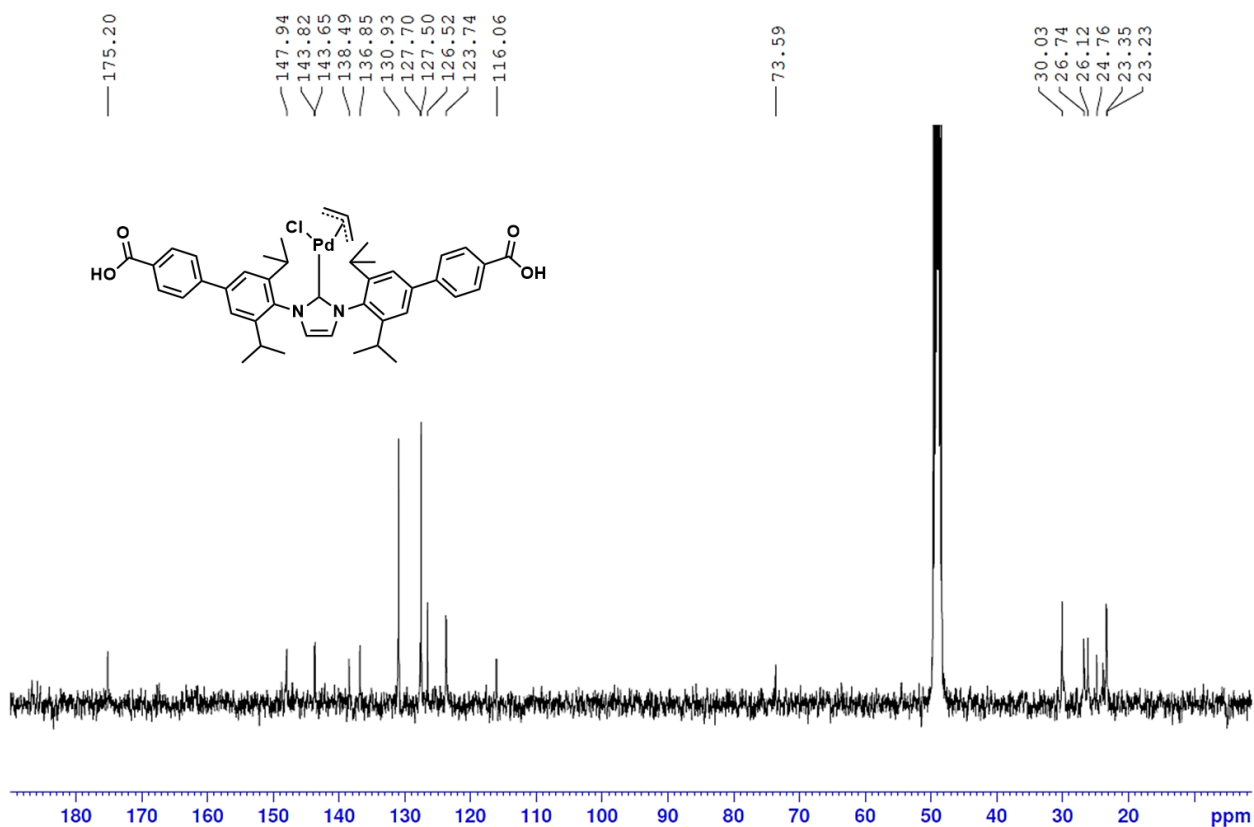

**$^1\text{H}$  NMR spectrum of  $[(\text{IPr})(\text{CO}_2\text{H})_2\text{IrCl}(\text{COD})]$**

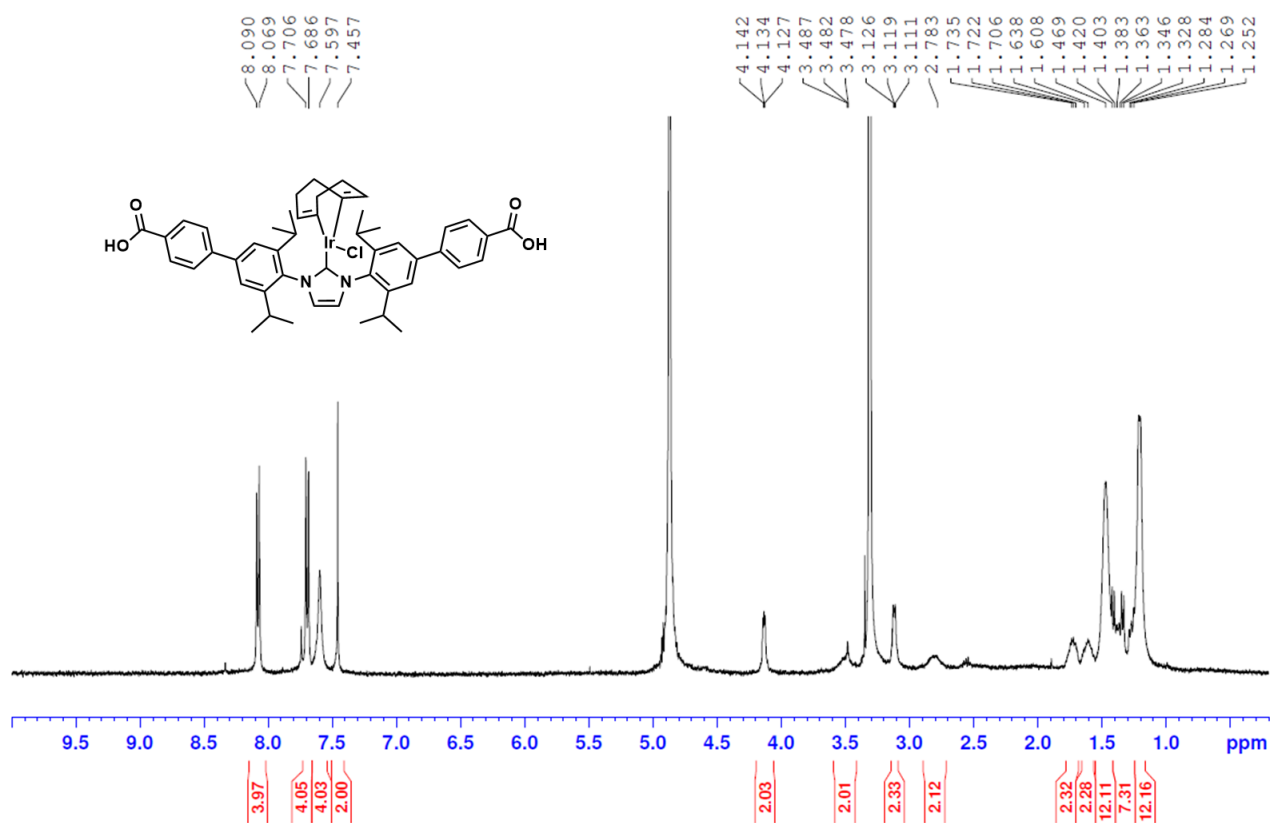

**$^{13}\text{C}$  NMR spectrum of  $[(\text{IPr})(\text{CO}_2\text{H})_2\text{IrCl}(\text{COD})]$**

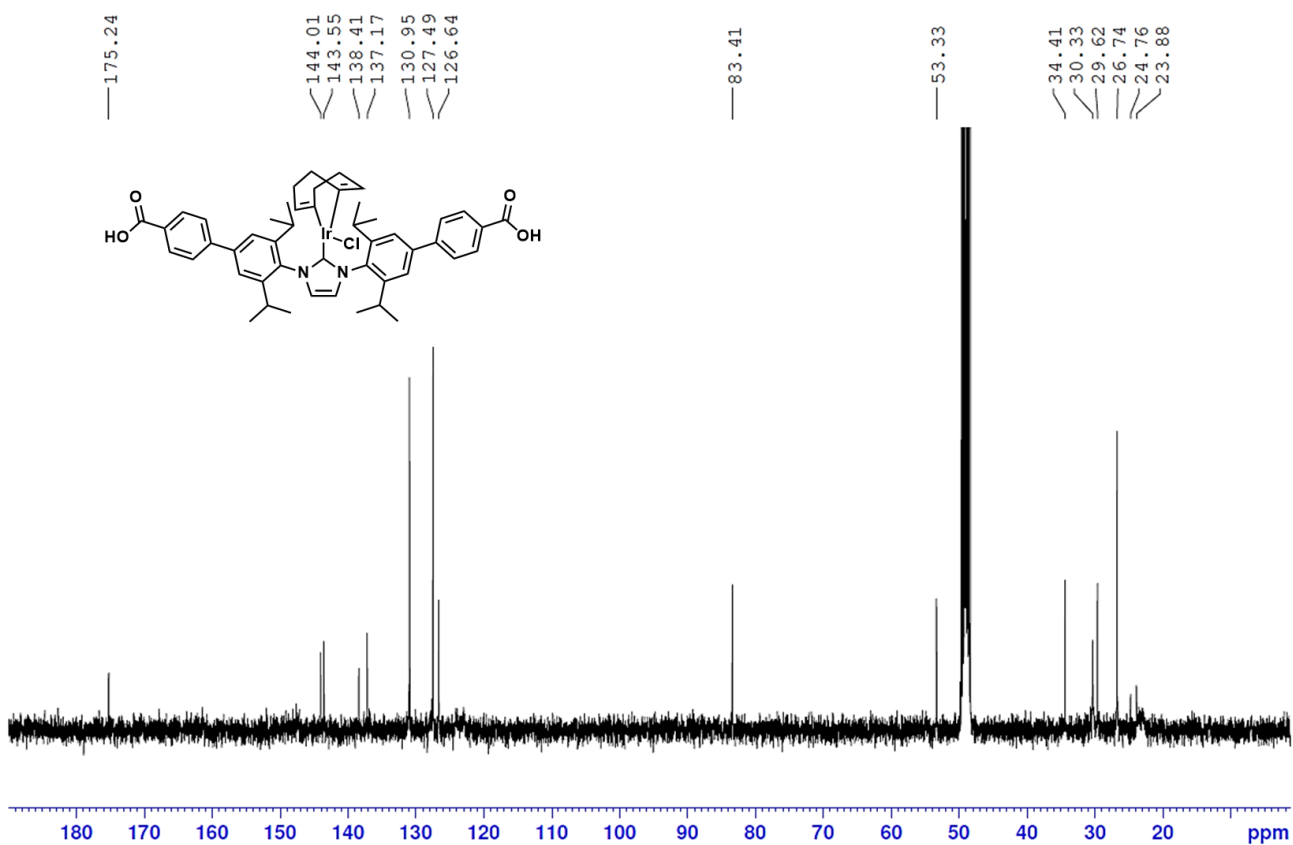

**$^1\text{H}$  NMR spectrum of  $[(\text{IPr})(\text{CO}_2\text{H})_2\text{IrCl}(\text{COD})]$**

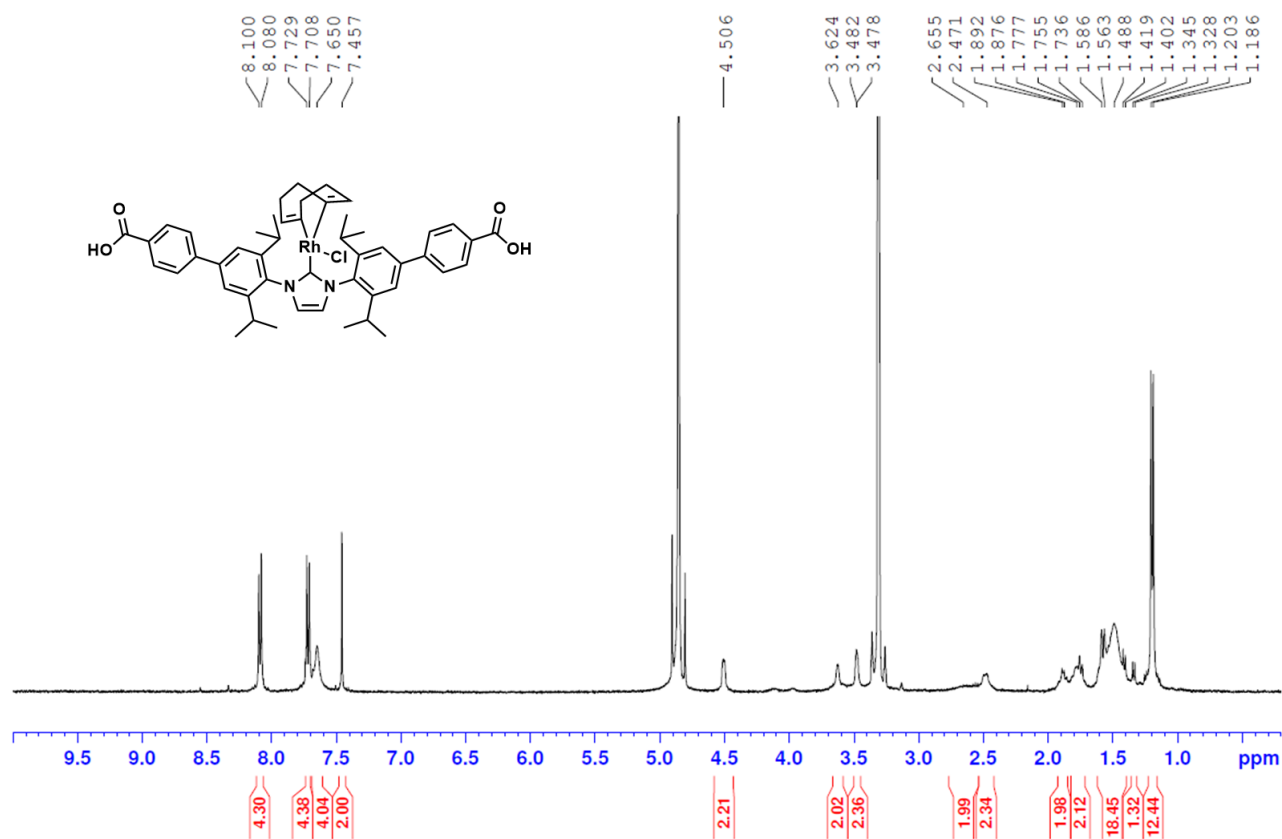

**$^{13}\text{C}$  NMR spectrum of  $[(\text{IPr})(\text{CO}_2\text{H})_2\text{IrCl}(\text{COD})]$**

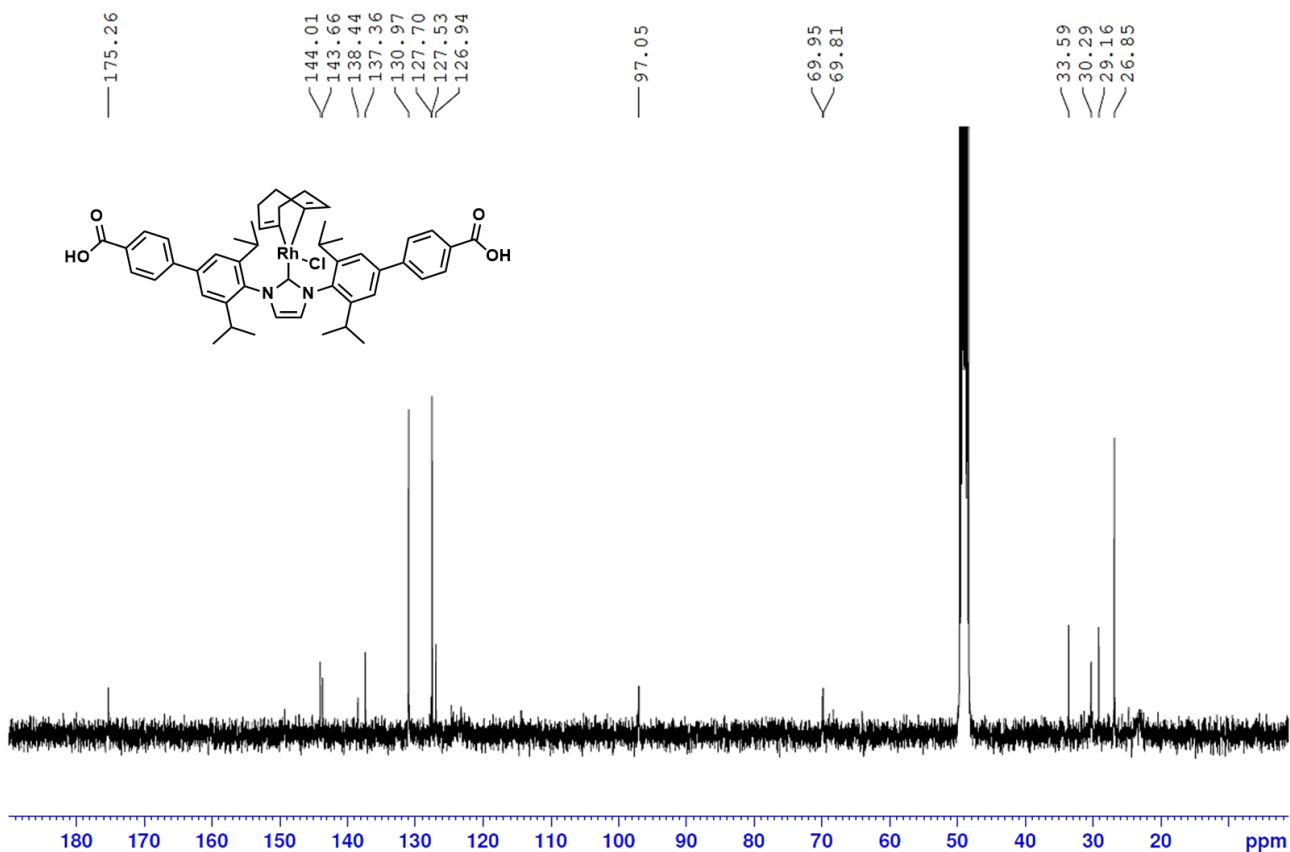

**<sup>1</sup>H NMR spectrum of 1-benzyl-4-phenyl-1*H*-1,2,3-triazole**

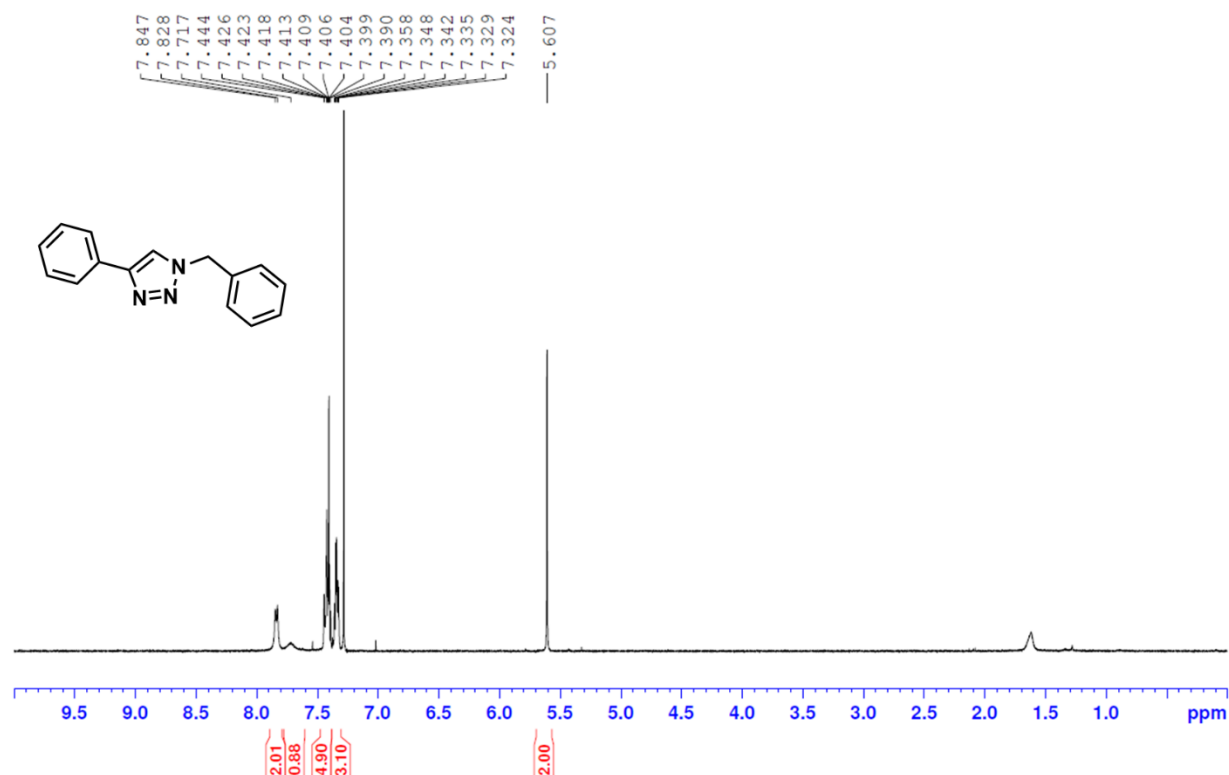

**<sup>13</sup>C NMR spectrum of 1-benzyl-4-phenyl-1*H*-1,2,3-triazole**

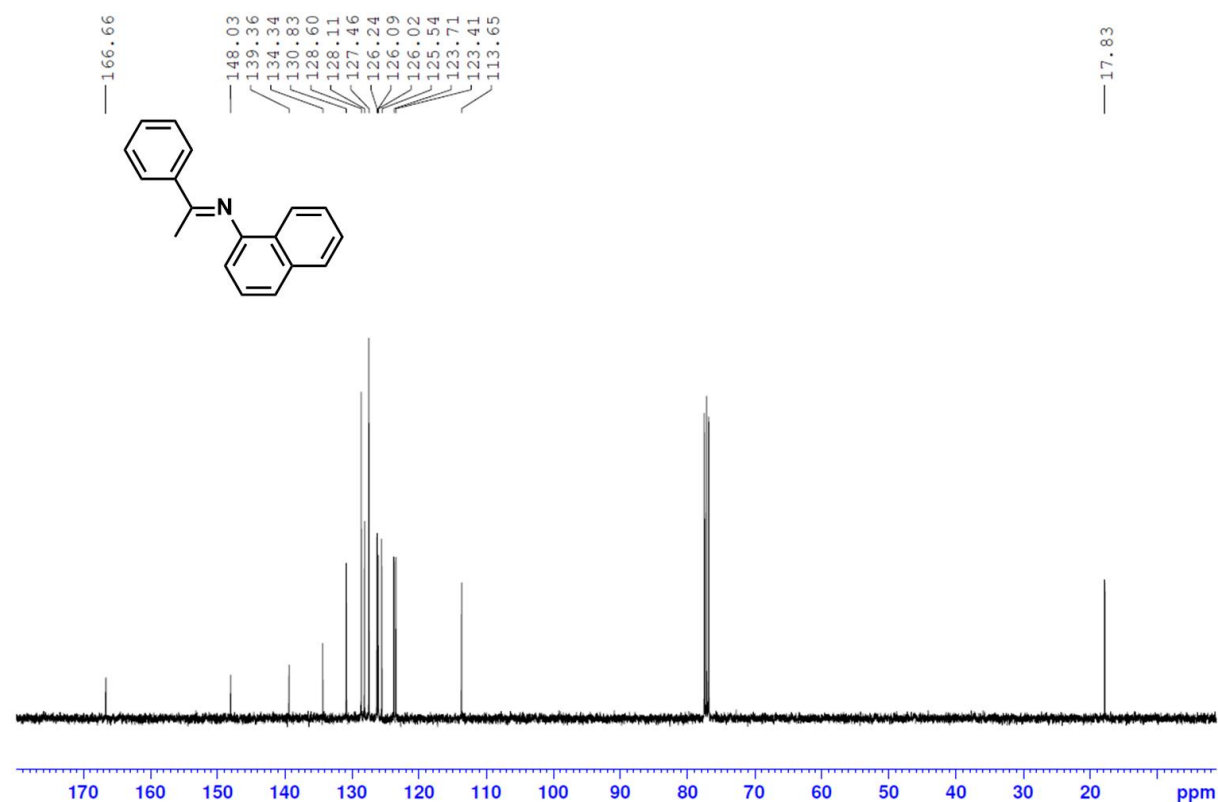

**<sup>1</sup>H NMR spectrum of 1-(4-nitrobenzyl)-4-phenyl-1*H*-1,2,3-triazole**

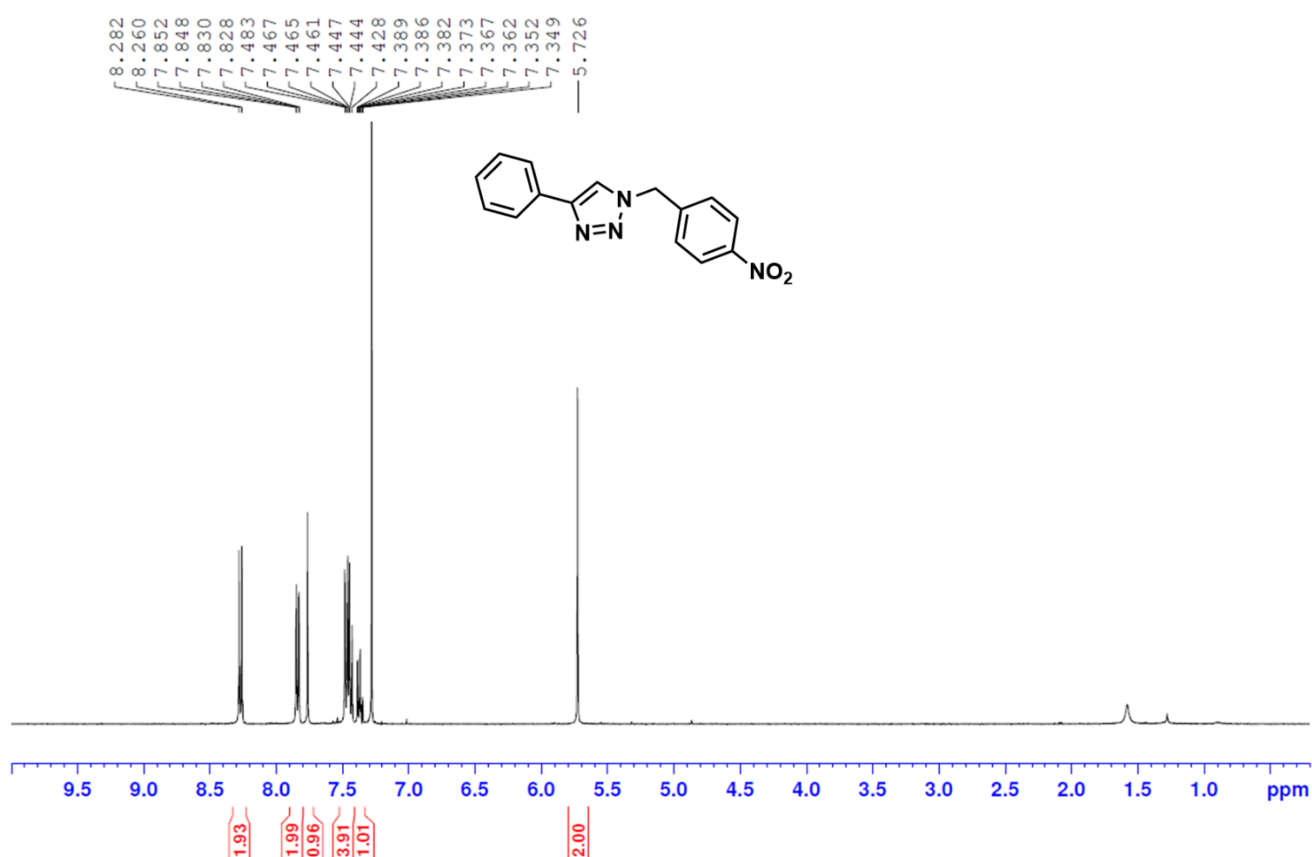

**<sup>13</sup>C NMR spectrum of 1-(4-nitrobenzyl)-4-phenyl-1*H*-1,2,3-triazole**

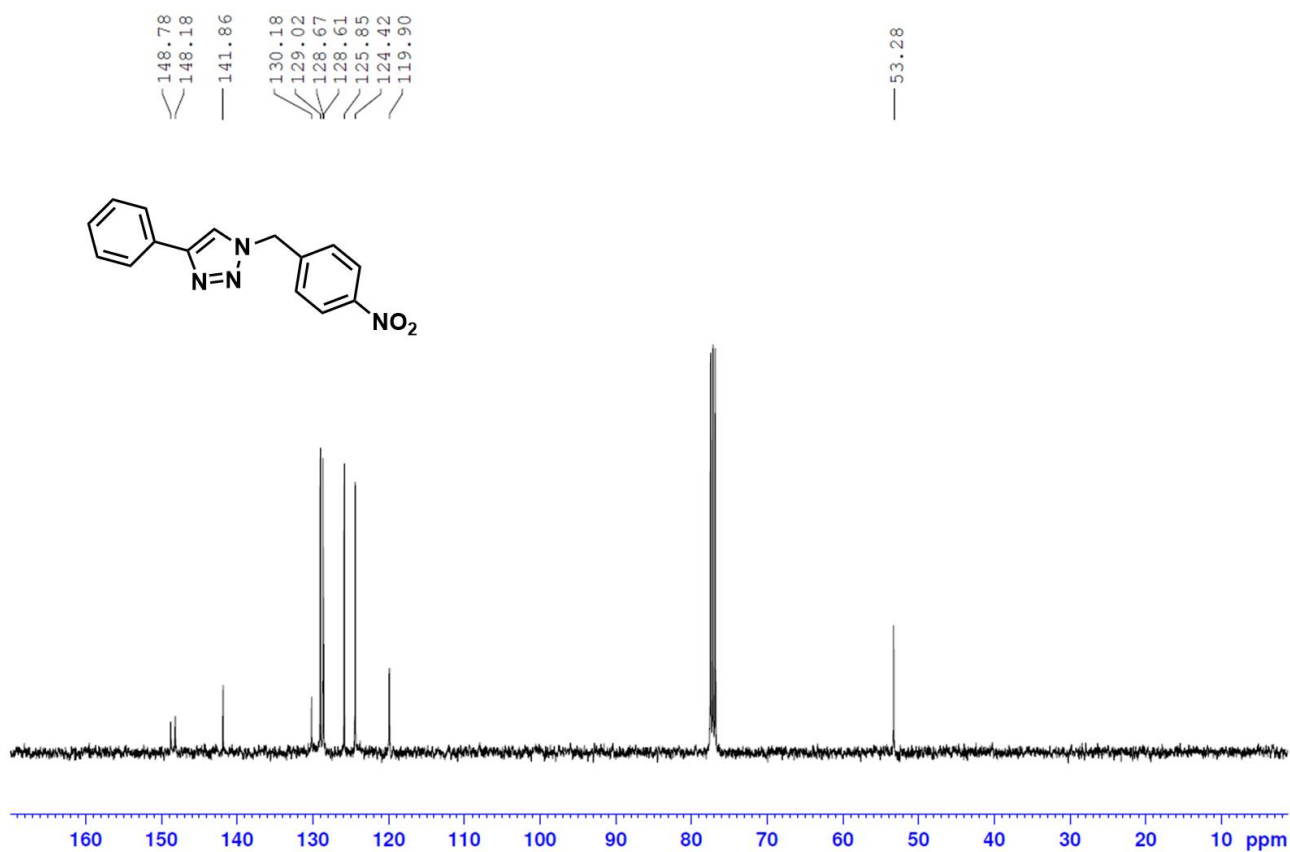



**<sup>1</sup>H NMR spectrum of 1-(4-methoxybenzyl)-4-phenyl-1*H*-1,2,3-triazole**

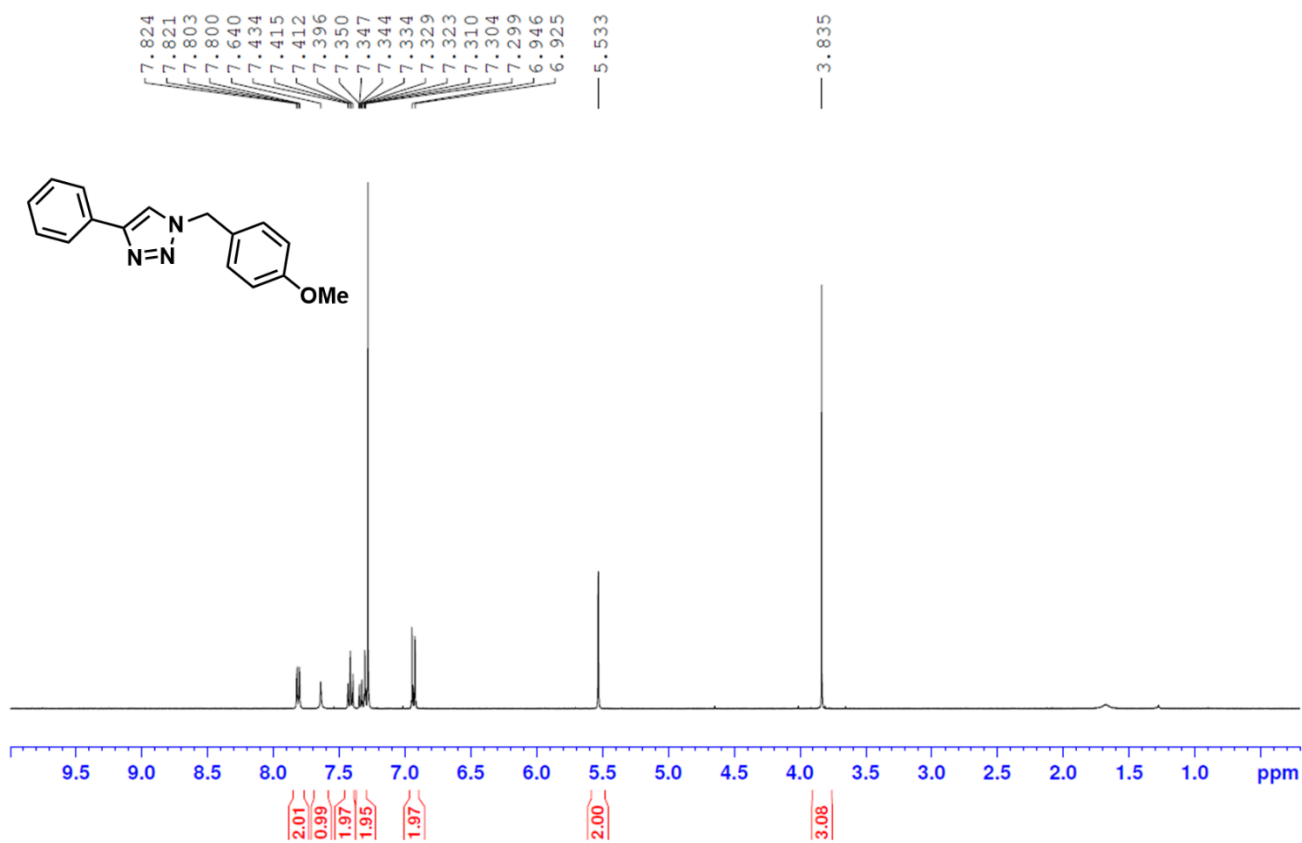

**<sup>13</sup>C NMR spectrum of 1-(4-methoxybenzyl)-4-phenyl-1*H*-1,2,3-triazole**

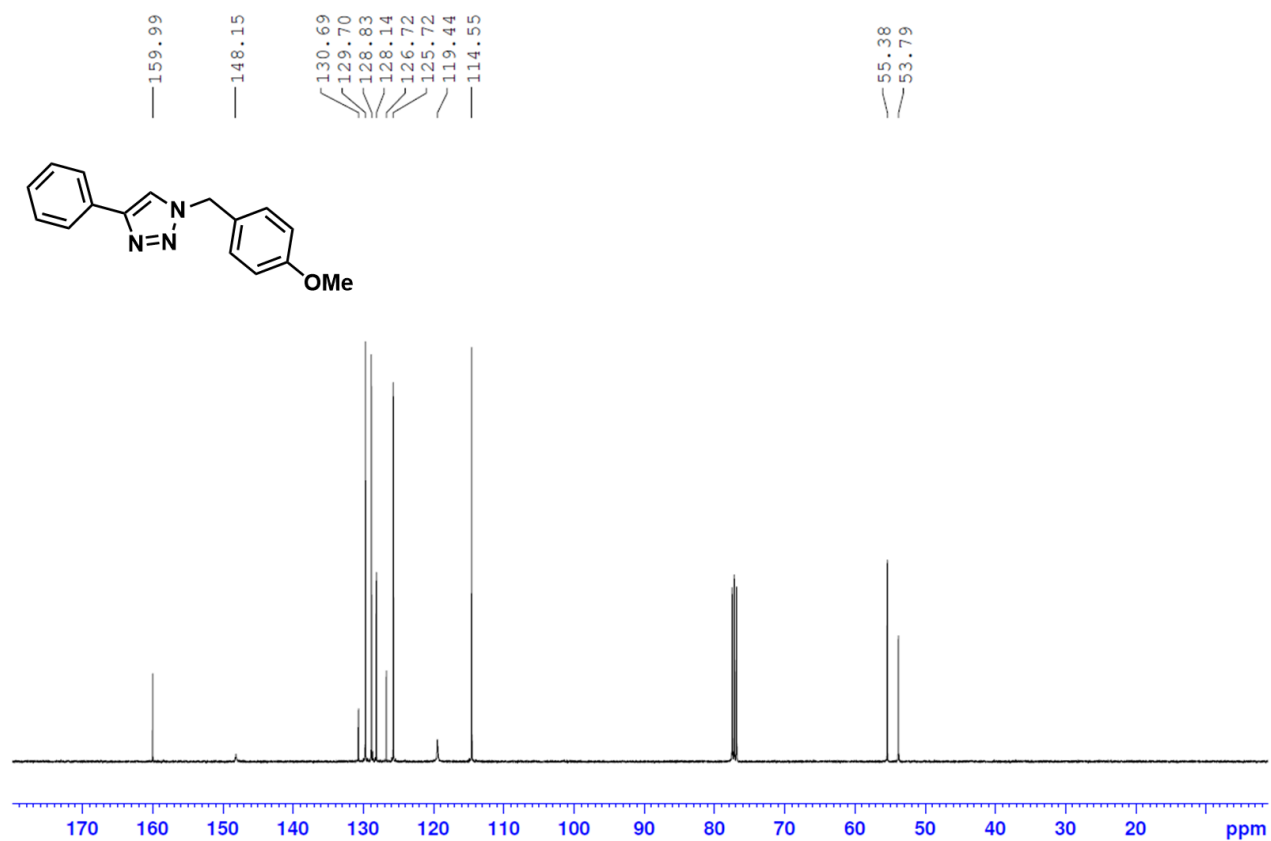

**<sup>1</sup>H NMR spectrum of 1-benzyl-4-(4-nitrophenyl)-1*H*-1,2,3-triazole**

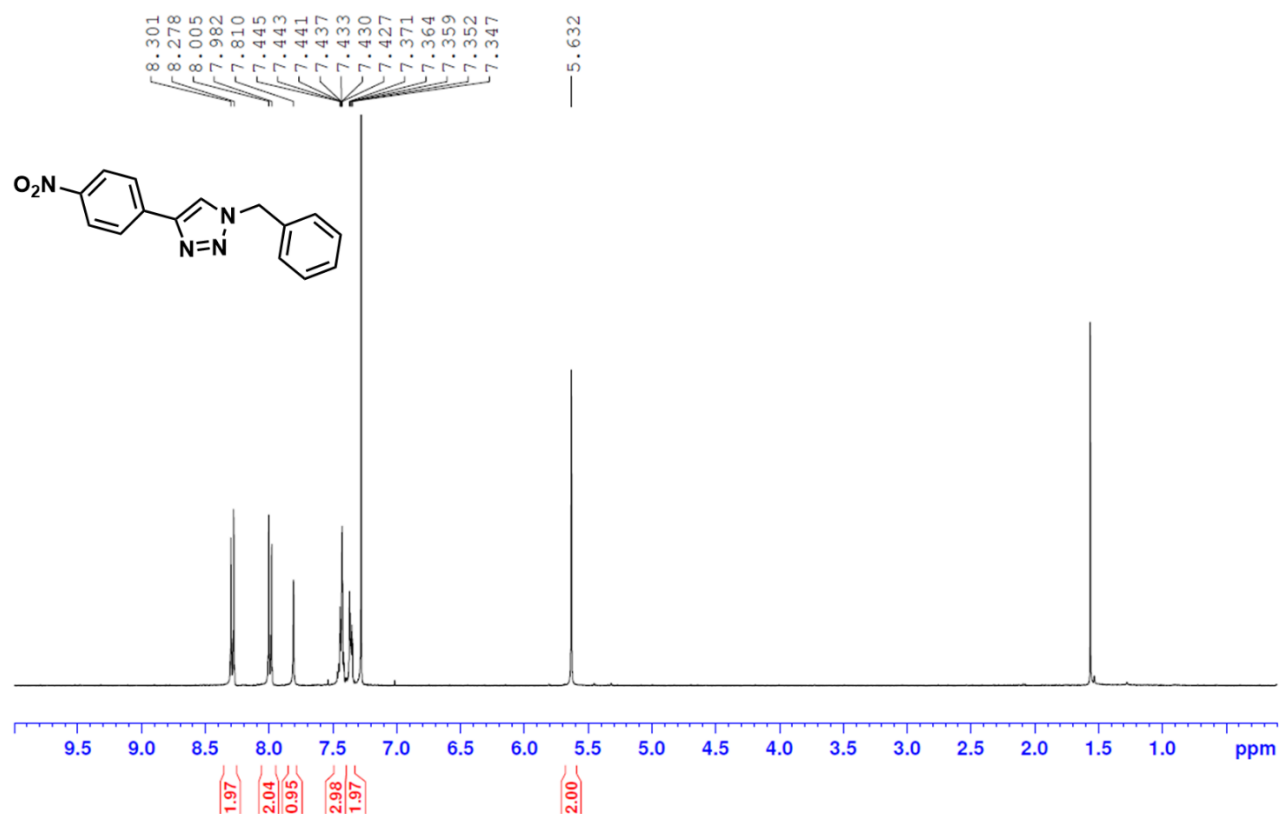

**<sup>13</sup>C NMR spectrum of 1-benzyl-4-(4-nitrophenyl)-1*H*-1,2,3-triazole**

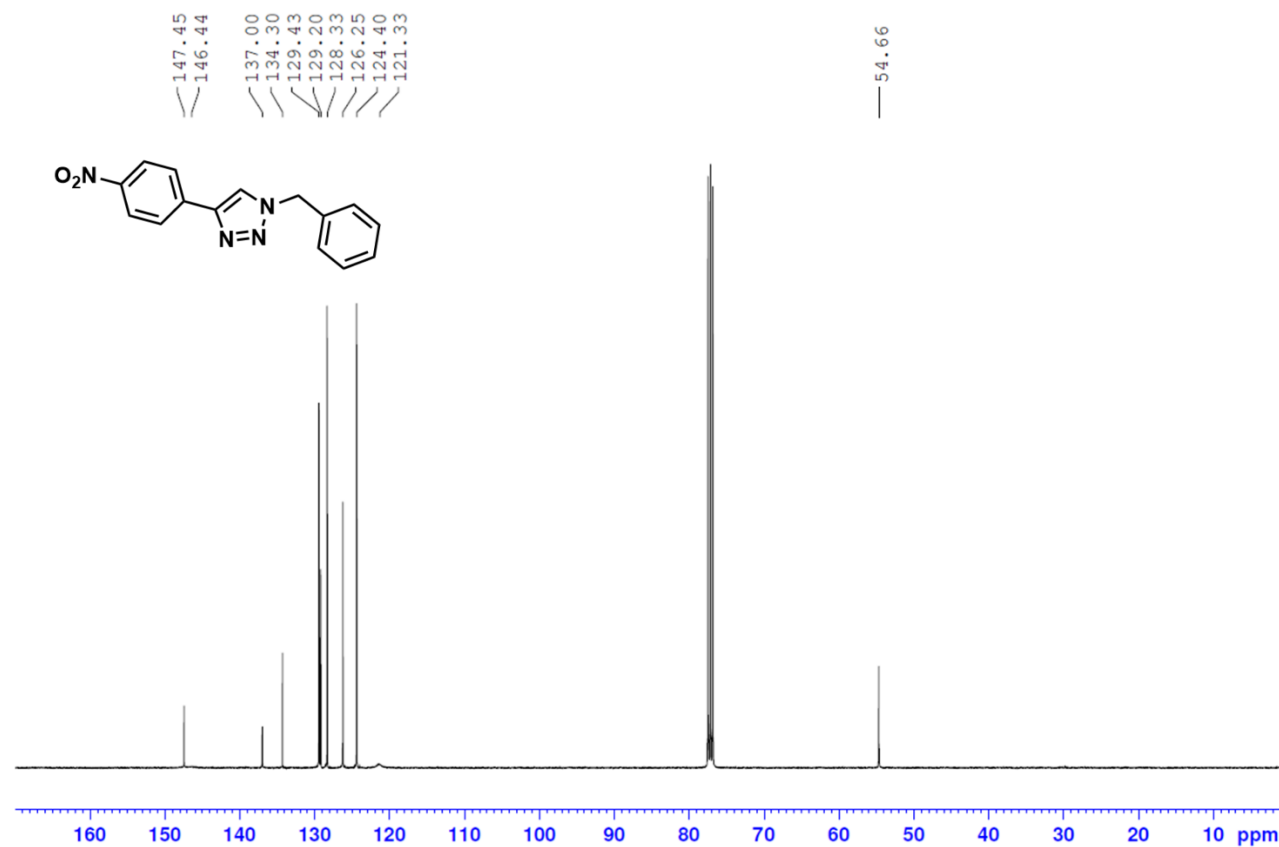

**<sup>1</sup>H NMR spectrum of 1-benzyl-4-(4-methoxyphenyl)-1*H*-1,2,3-triazole**

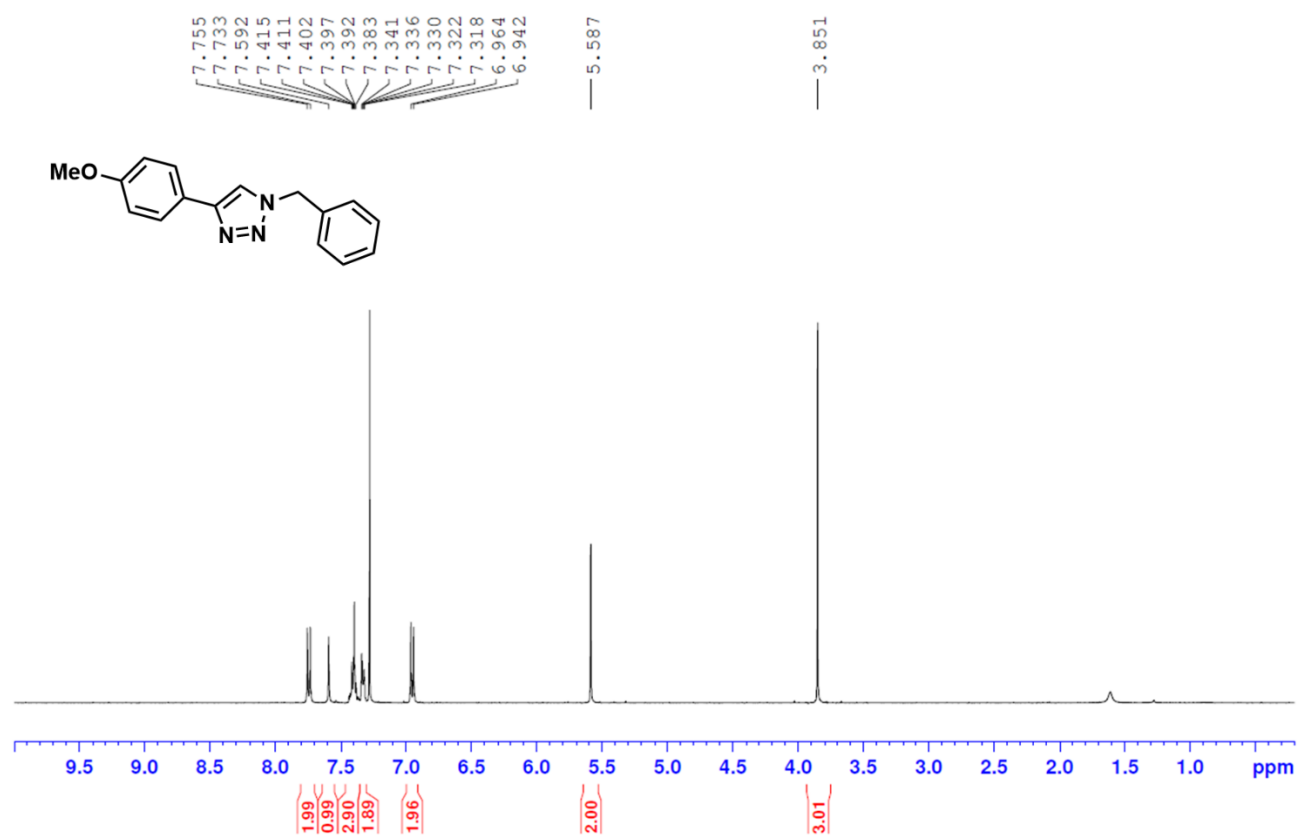

**<sup>13</sup>C NMR spectrum of 1-benzyl-4-(4-methoxyphenyl)-1*H*-1,2,3-triazole**

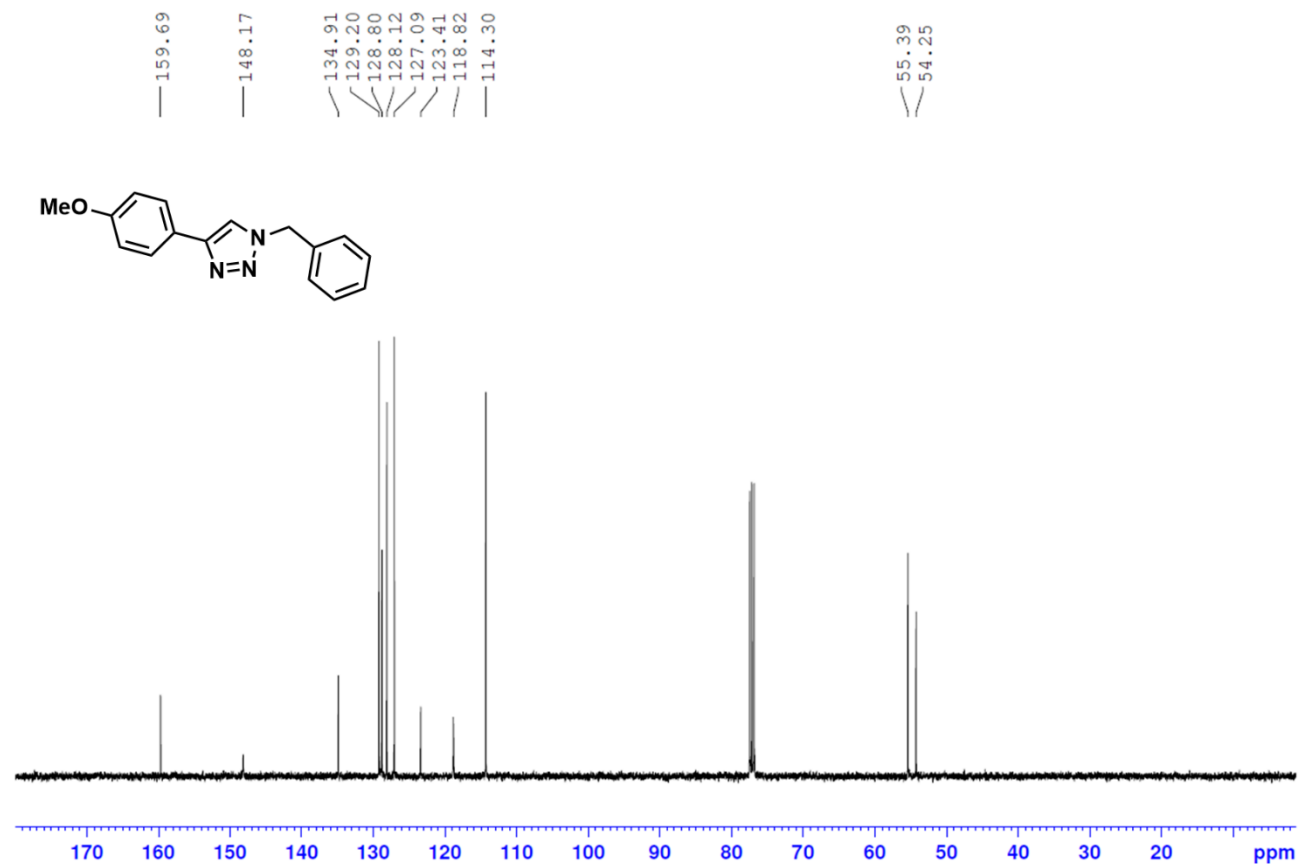

**<sup>1</sup>H NMR spectrum of 1-([1,1'-biphenyl]-4-ylmethyl)-4-phenyl-1*H*-1,2,3-triazole**

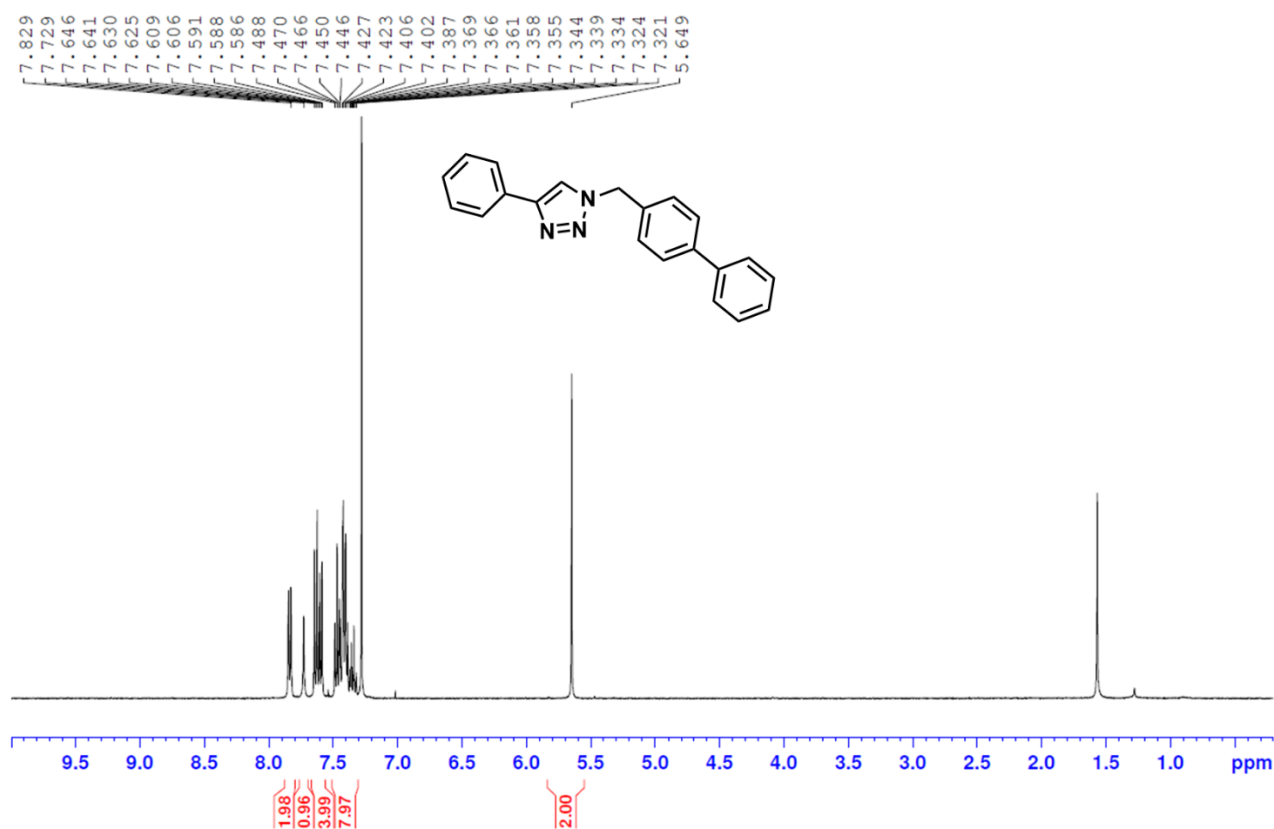

**<sup>13</sup>C NMR spectrum of 1-([1,1'-biphenyl]-4-ylmethyl)-4-phenyl-1*H*-1,2,3-triazole**

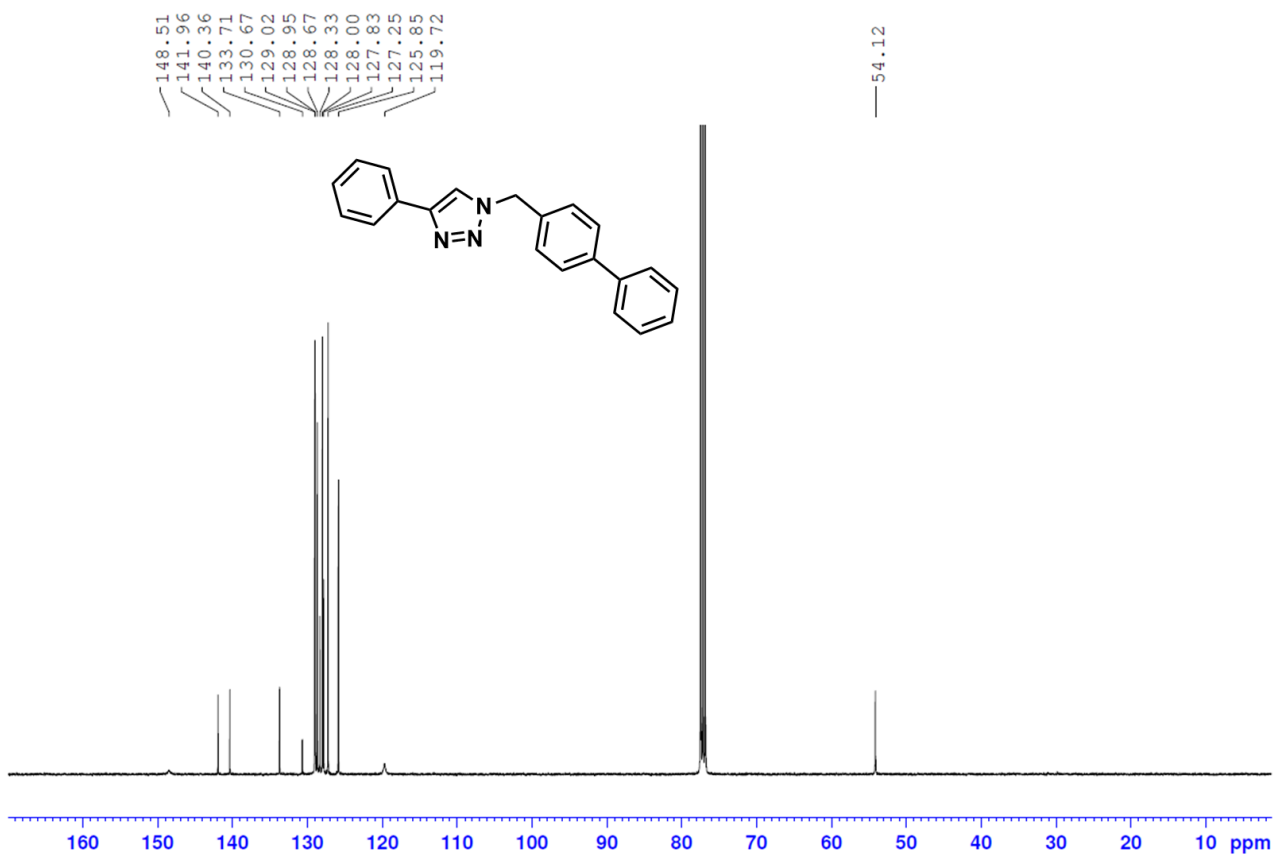

**<sup>1</sup>H NMR spectrum of 4-([1,1'-biphenyl]-4-yl)-1-benzyl-1*H*-1,2,3-triazole**

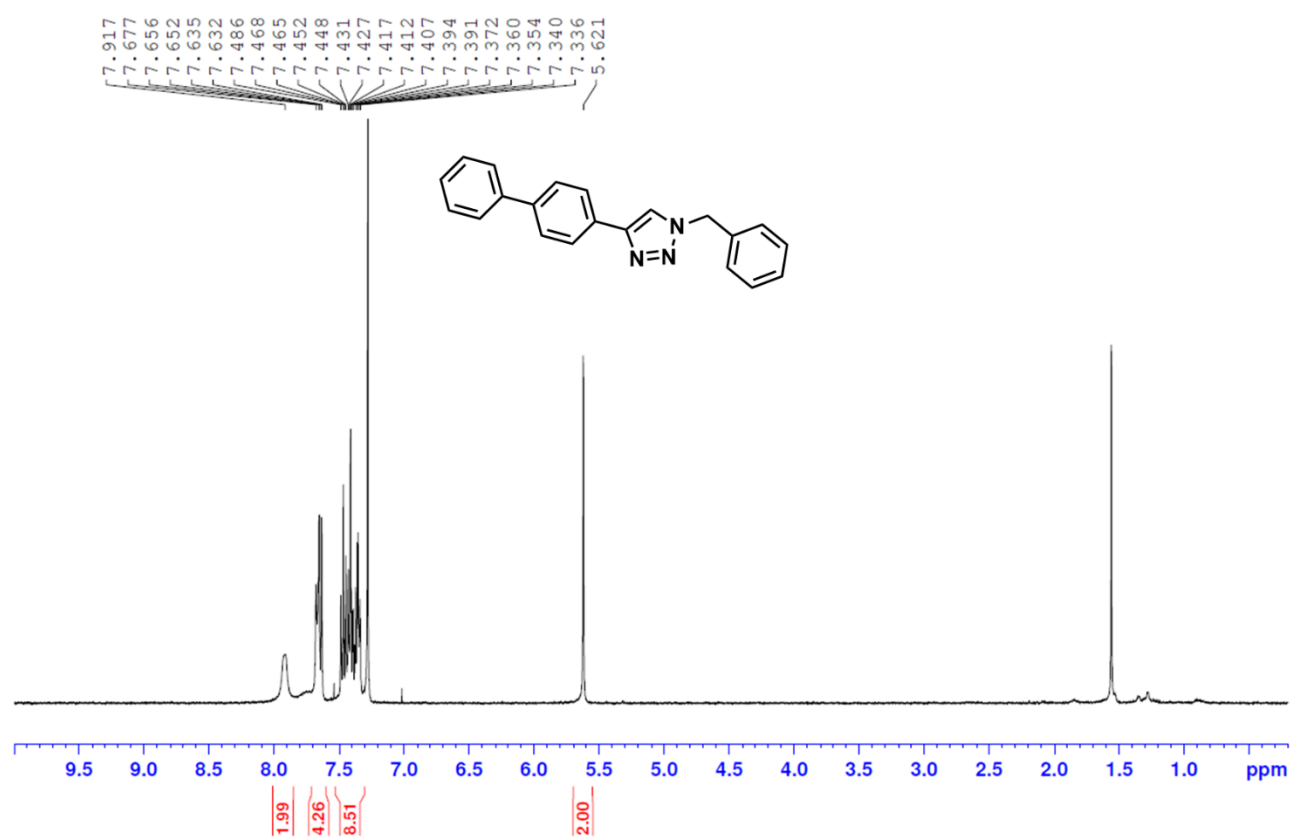

**<sup>13</sup>C NMR spectrum of 4-([1,1'-biphenyl]-4-yl)-1-benzyl-1*H*-1,2,3-triazole**

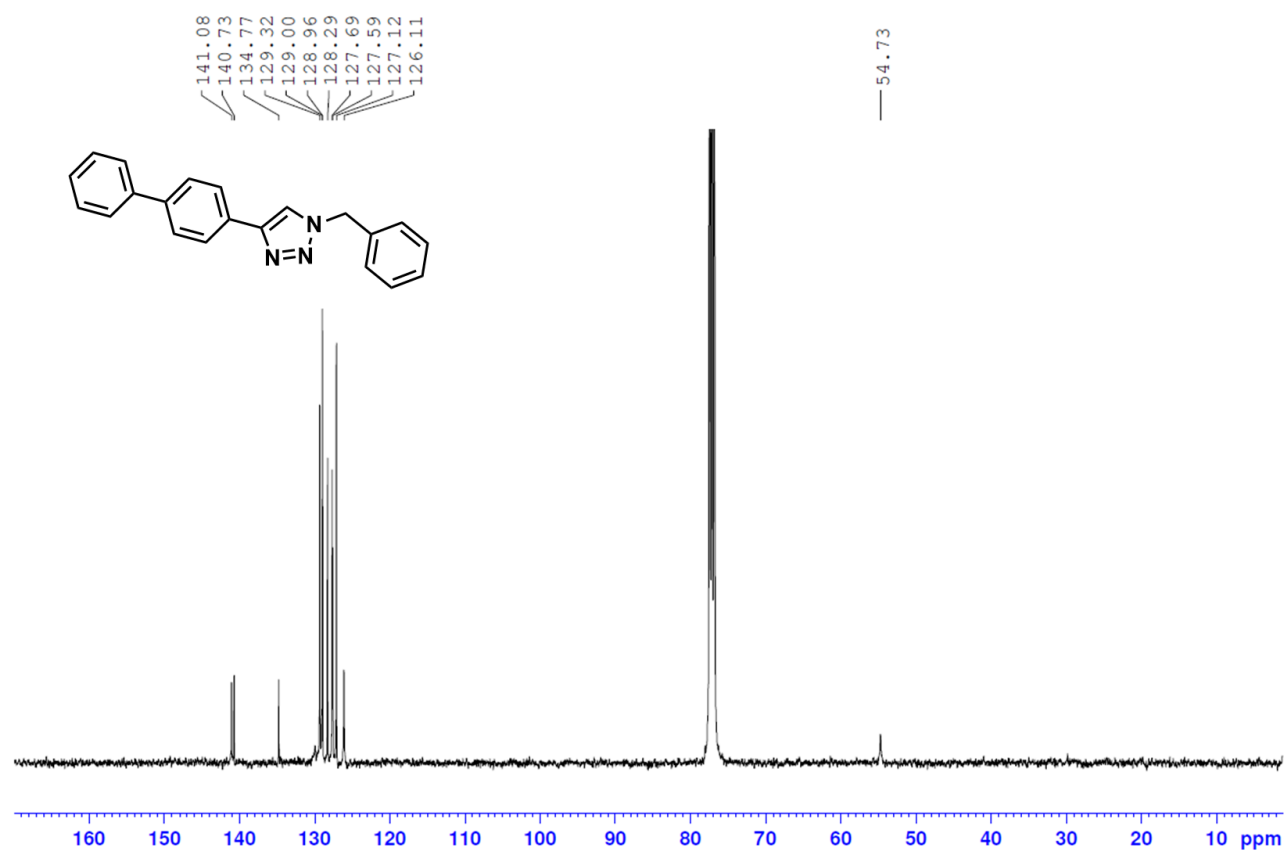

**<sup>1</sup>H NMR spectrum of 1-(naphthalen-1-ylmethyl)-4-phenyl-1*H*-1,2,3-triazole**

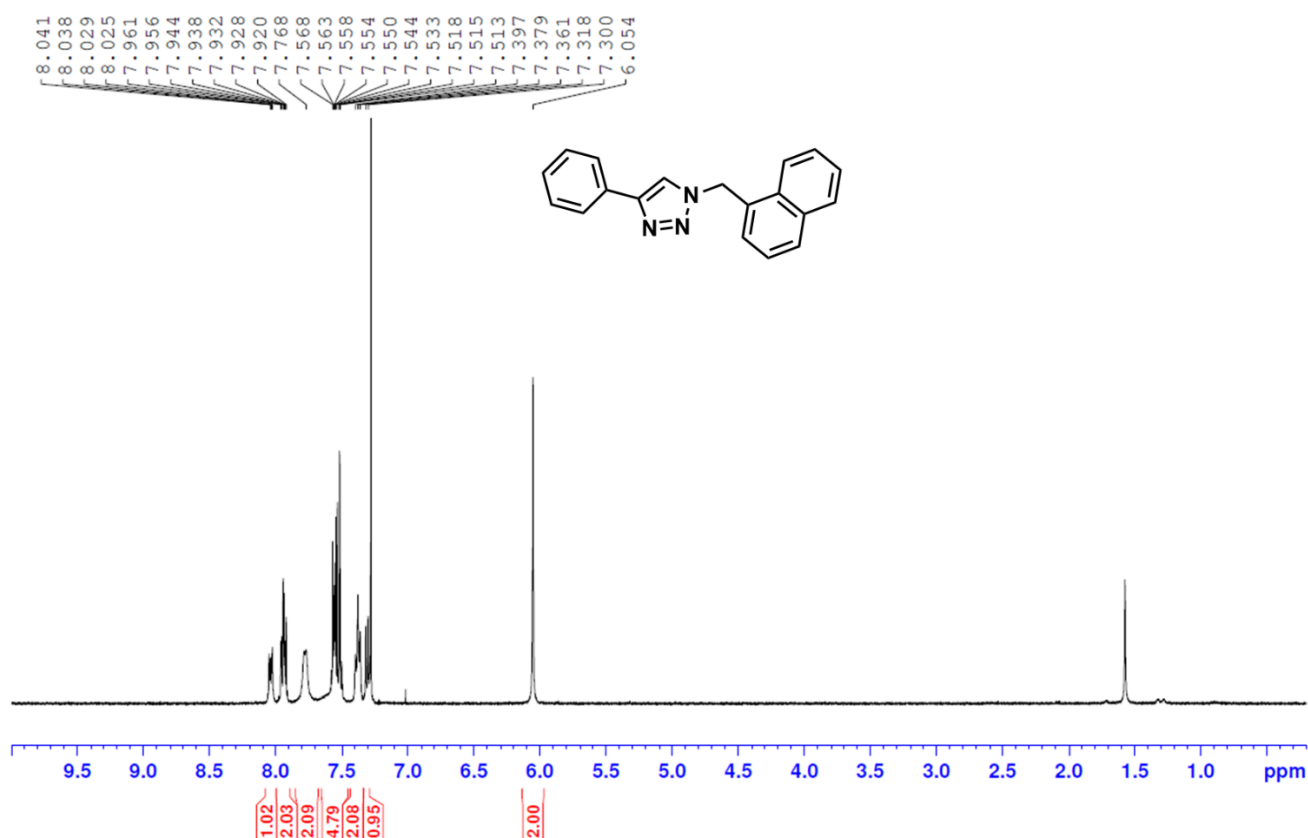

**<sup>13</sup>C NMR spectrum of 1-(naphthalen-1-ylmethyl)-4-phenyl-1*H*-1,2,3-triazole**

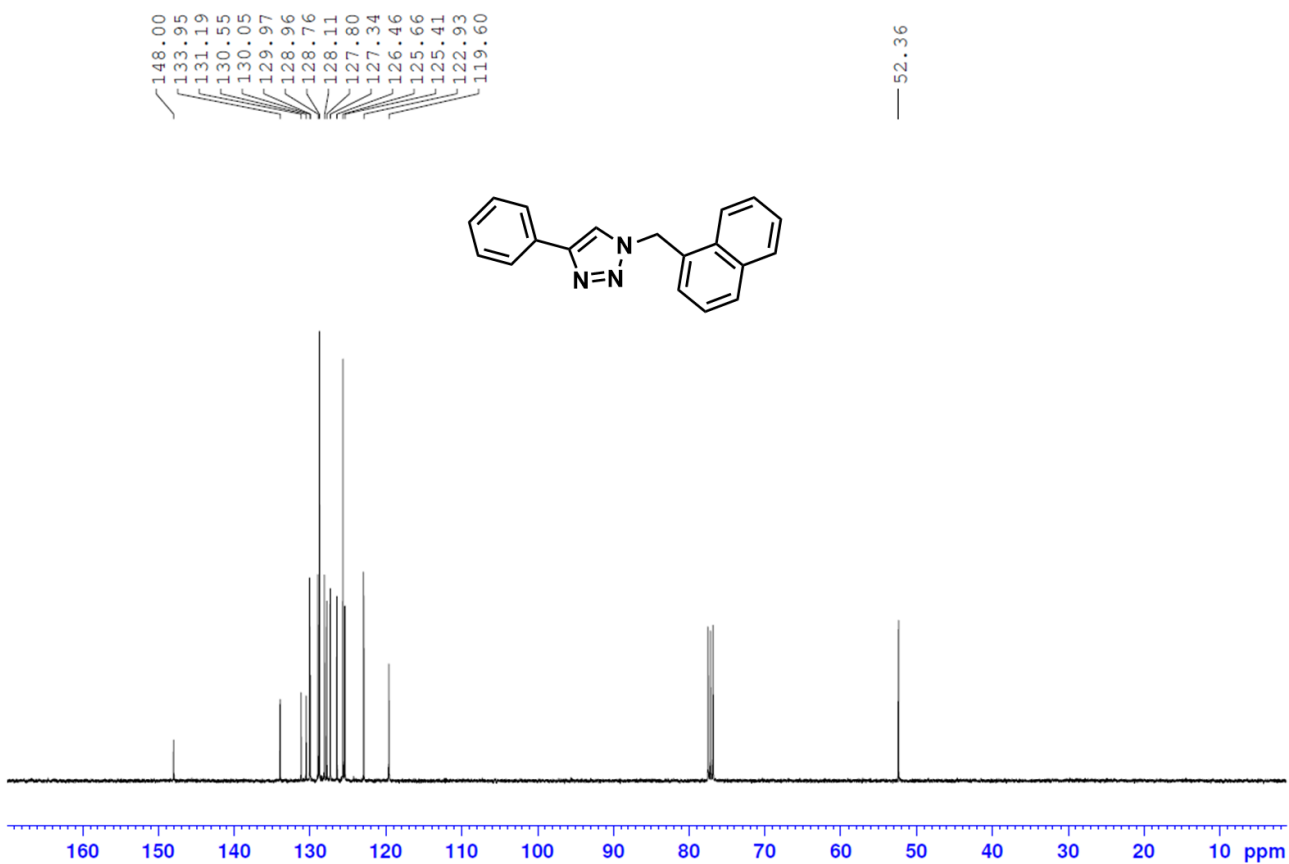

**<sup>1</sup>H NMR spectrum of 2-phenyl-*N*-propyl-*N*-tosylacetimidamide**

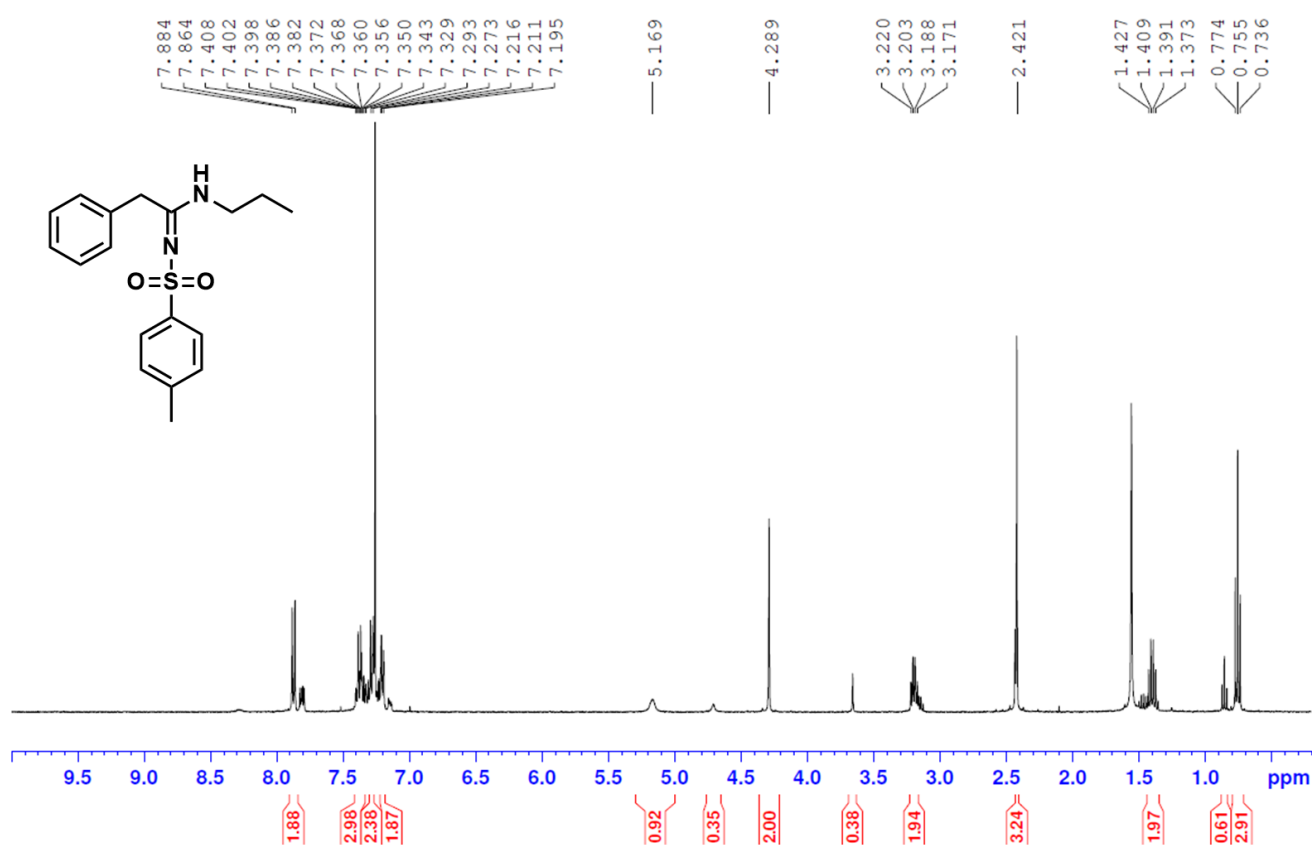

**<sup>13</sup>C NMR spectrum of 2-phenyl-*N*-propyl-*N*-tosylacetimidamide**

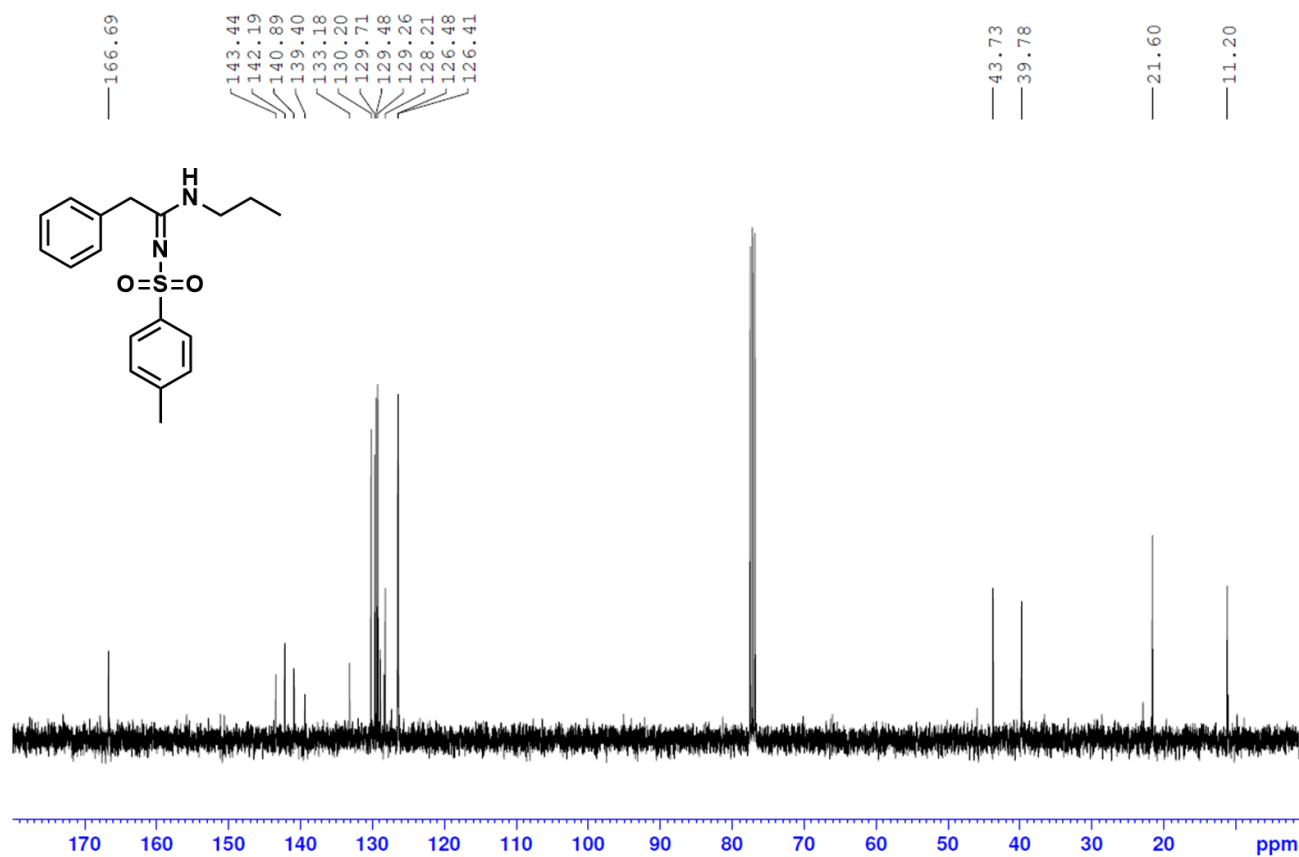

**<sup>1</sup>H NMR spectrum of 2-(4-nitrophenyl)-*N*-propyl-*N*-tosylacetimidamide**

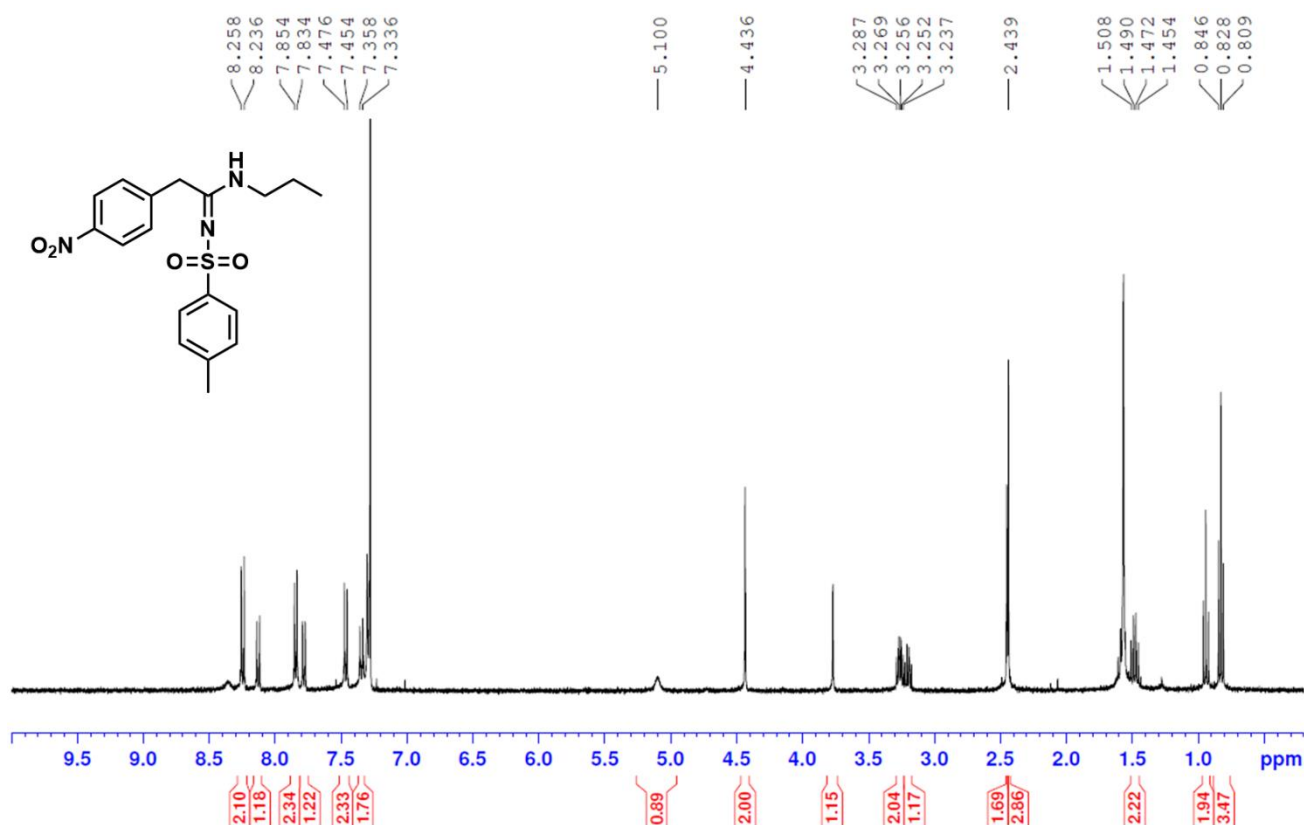

**<sup>13</sup>C NMR spectrum of 2-(4-nitrophenyl)-*N*-propyl-*N*-tosylacetimidamide**

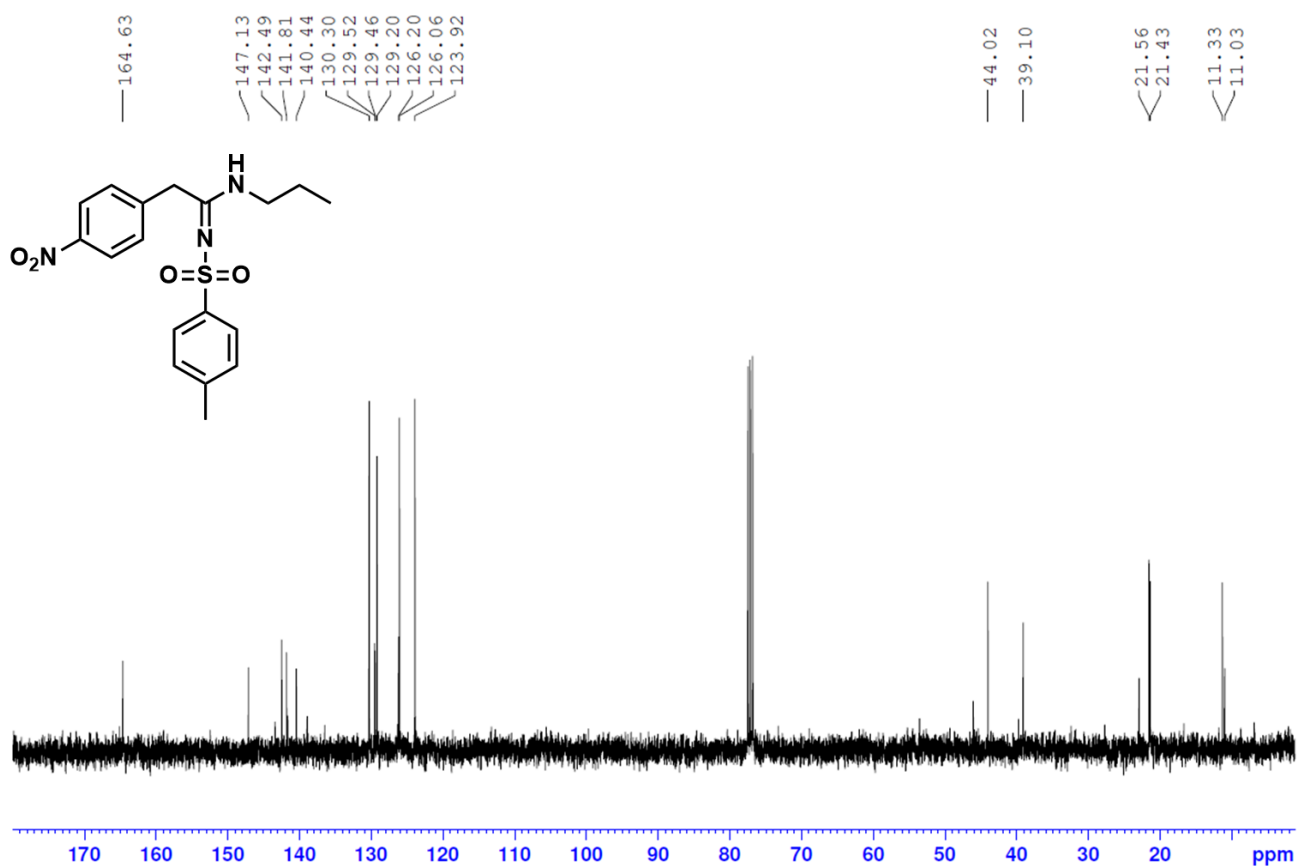



**<sup>1</sup>H NMR spectrum of 2-(4-methoxyphenyl)-*N*-propyl-*N'*-tosylacetimidamide**

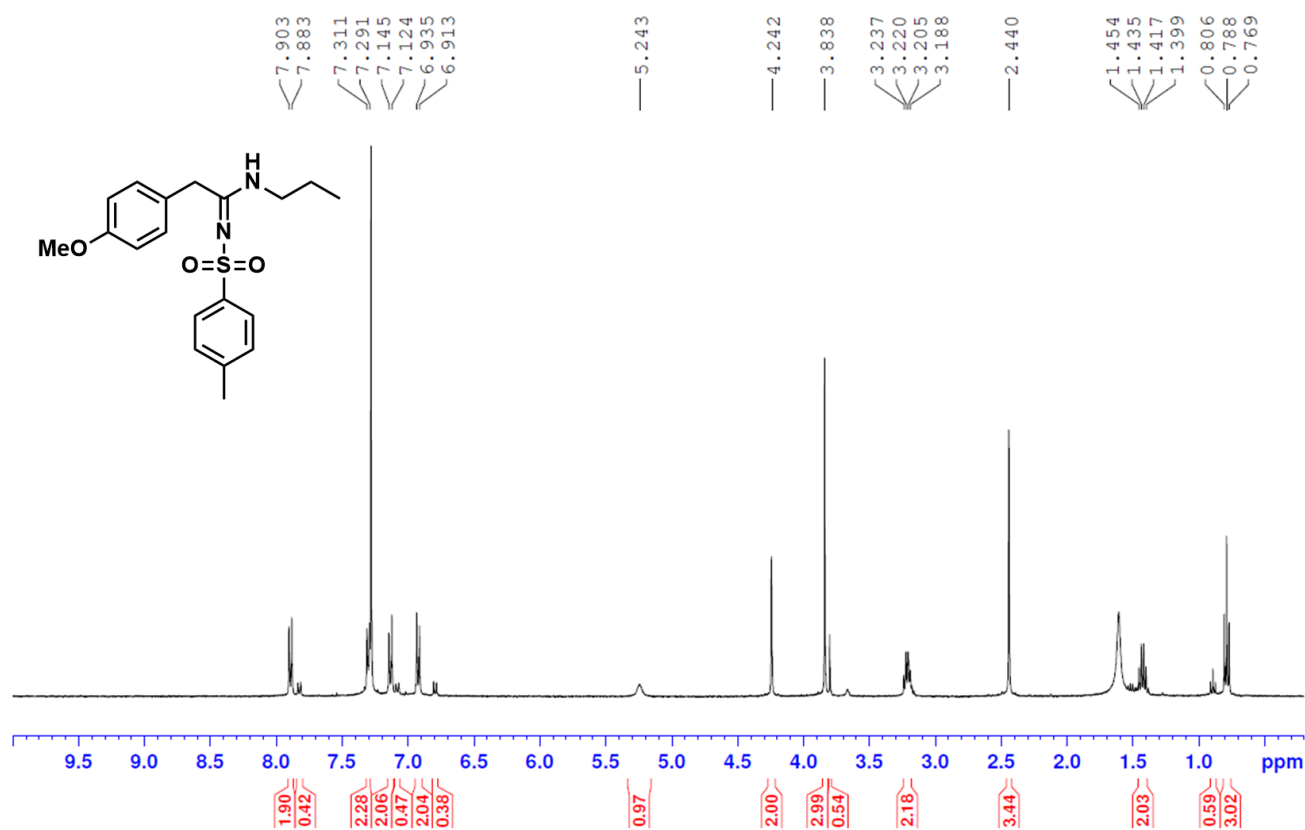

**<sup>13</sup>C NMR spectrum of 2-(4-methoxyphenyl)-*N*-propyl-*N'*-tosylacetimidamide**

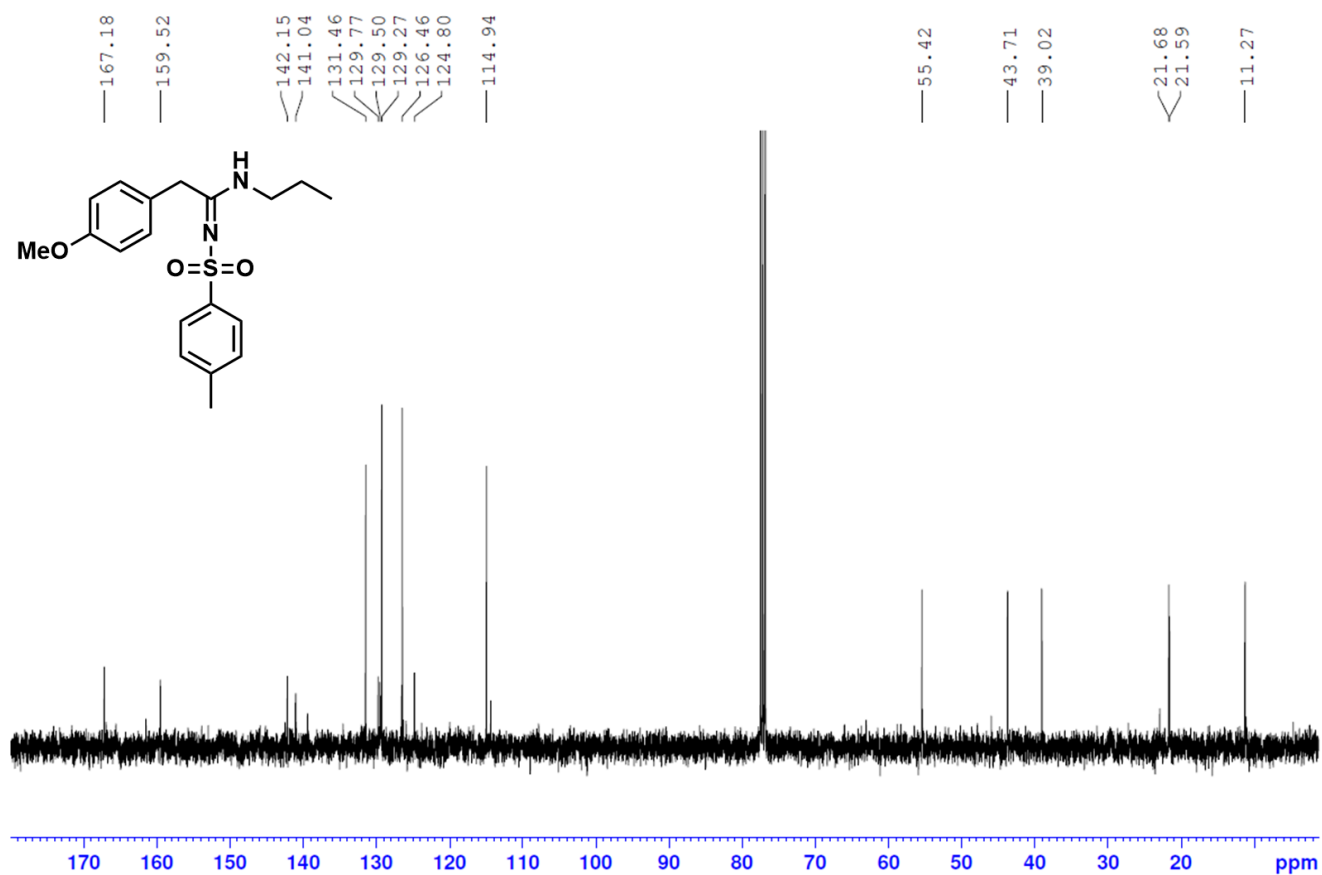

**<sup>1</sup>H NMR spectrum of *N,N*-diisopropyl-2-phenyl-*N'*-tosylacetimidamide**

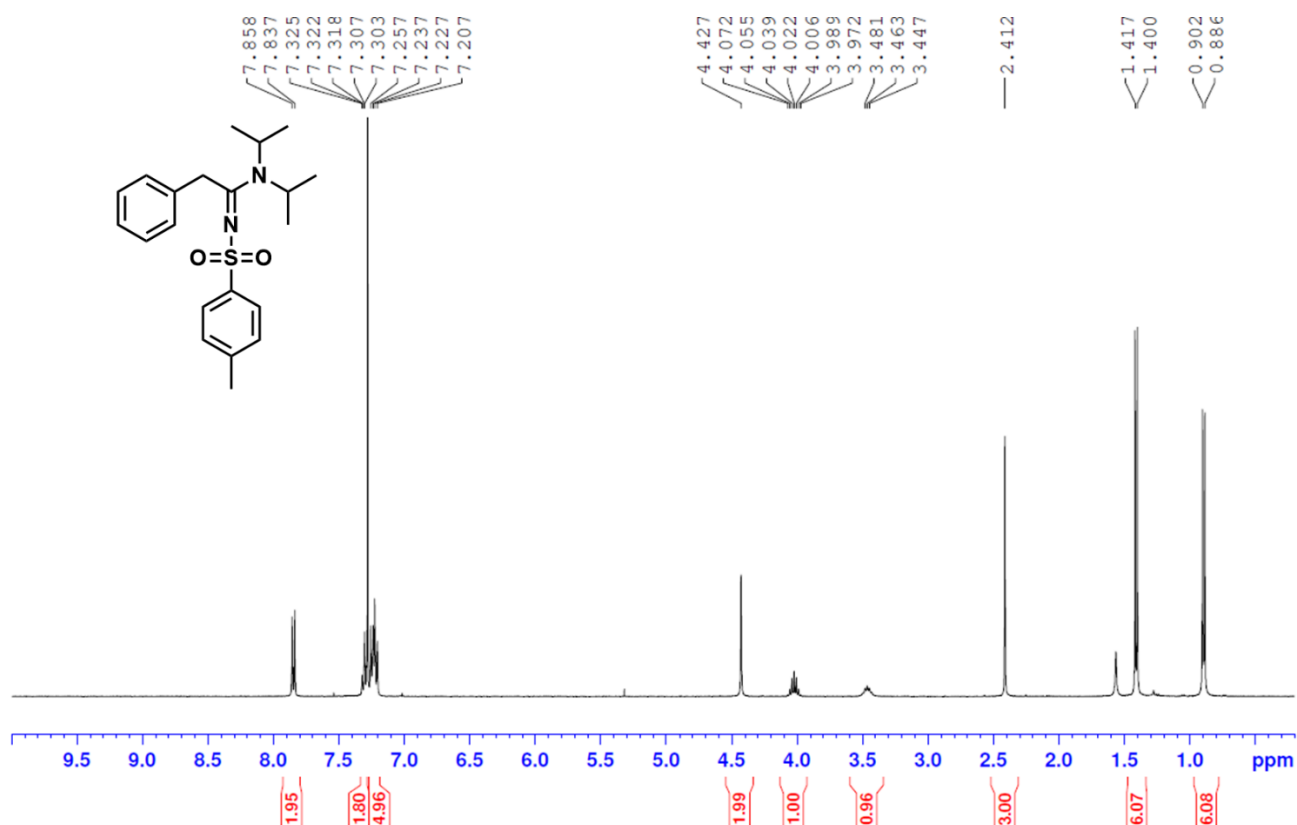

**<sup>13</sup>C NMR spectrum of *N,N*-diisopropyl-2-phenyl-*N'*-tosylacetimidamide**

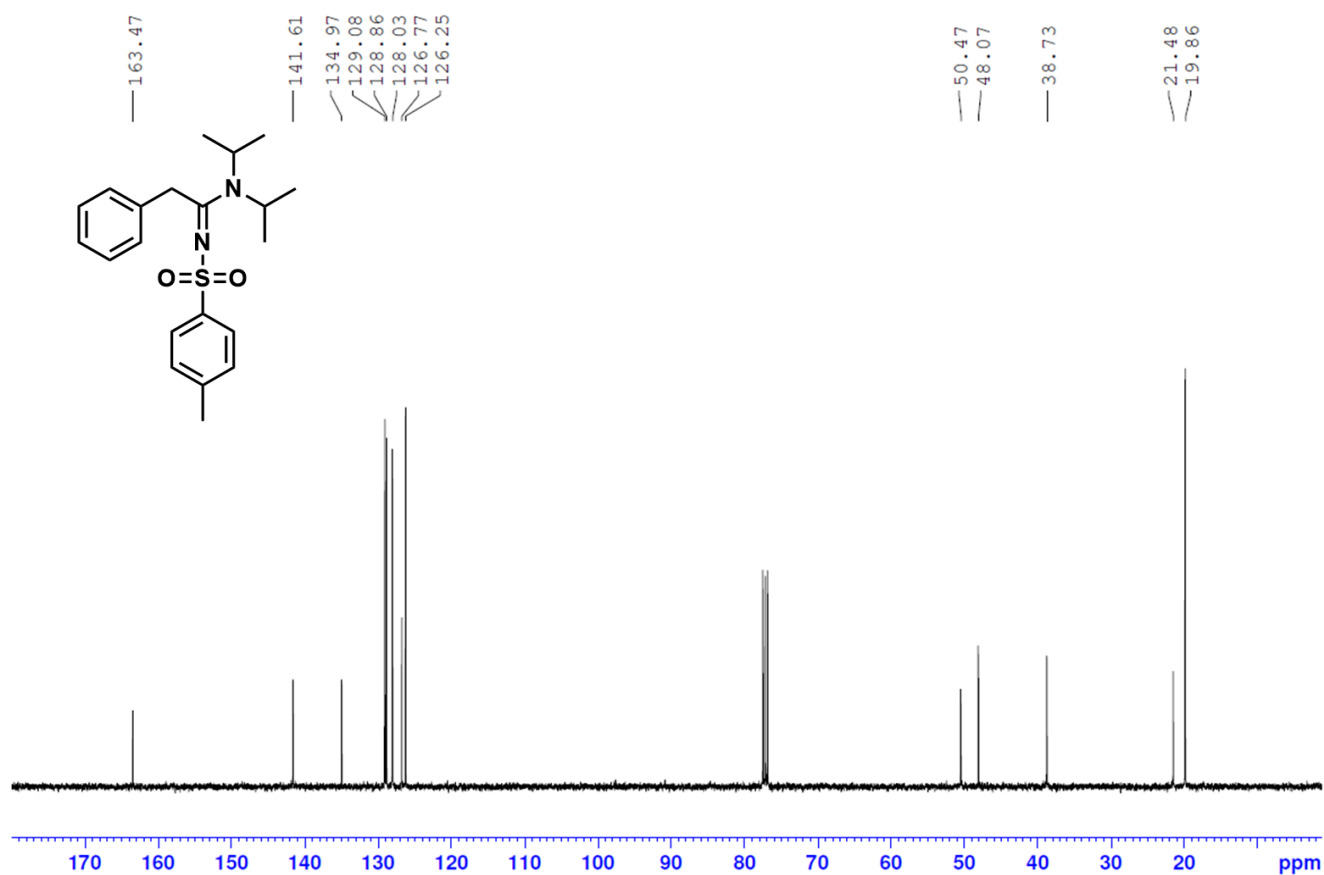

**<sup>1</sup>H NMR spectrum of *N*-benzyl-2-phenyl-*N*-tosylacetimidamide**

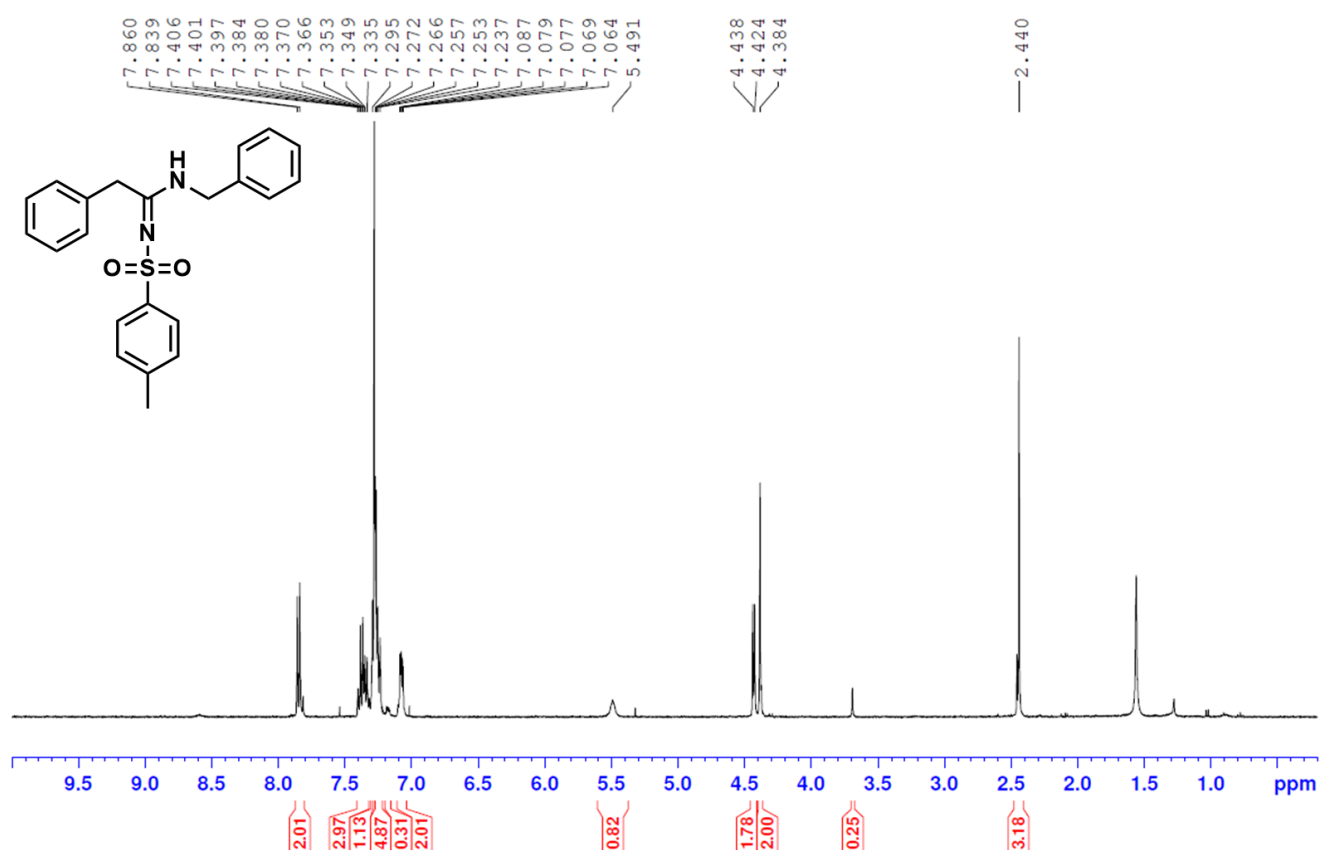

**<sup>13</sup>C NMR spectrum of *N*-benzyl-2-phenyl-*N*-tosylacetimidamide**

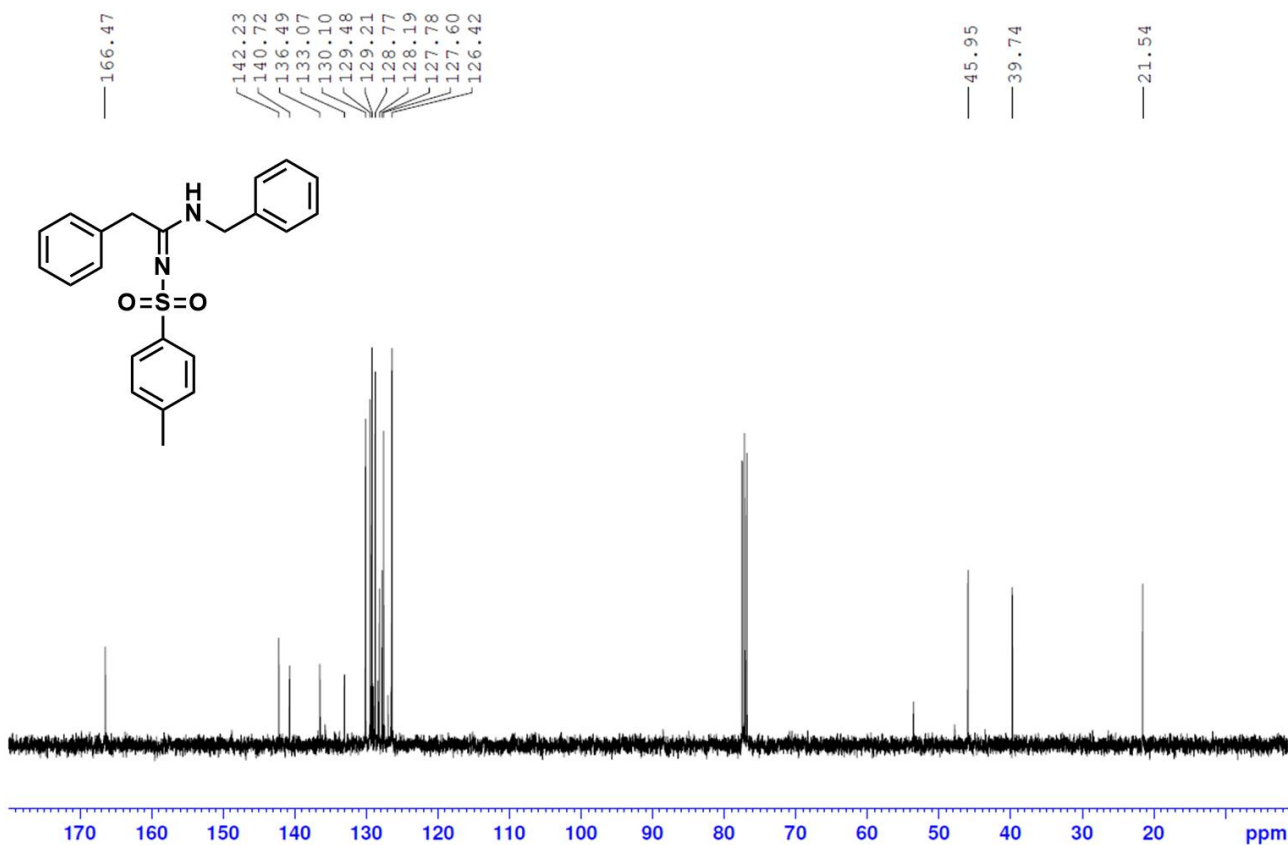

**<sup>1</sup>H NMR spectrum of *N*-methyl-*N*,2-diphenyl-*N'*-tosylacetimidamide**

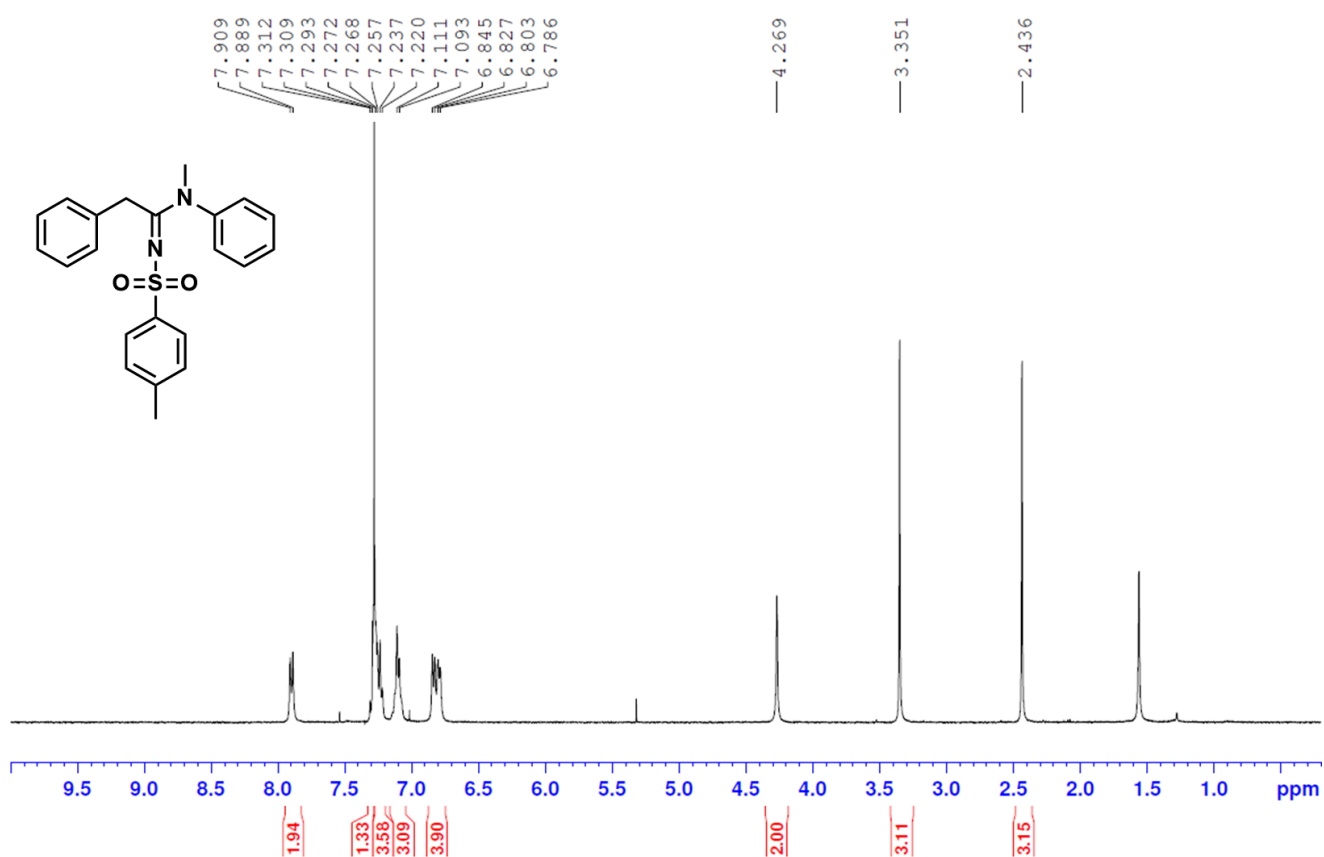

**<sup>13</sup>C NMR spectrum of *N*-methyl-*N*,2-diphenyl-*N'*-tosylacetimidamide**

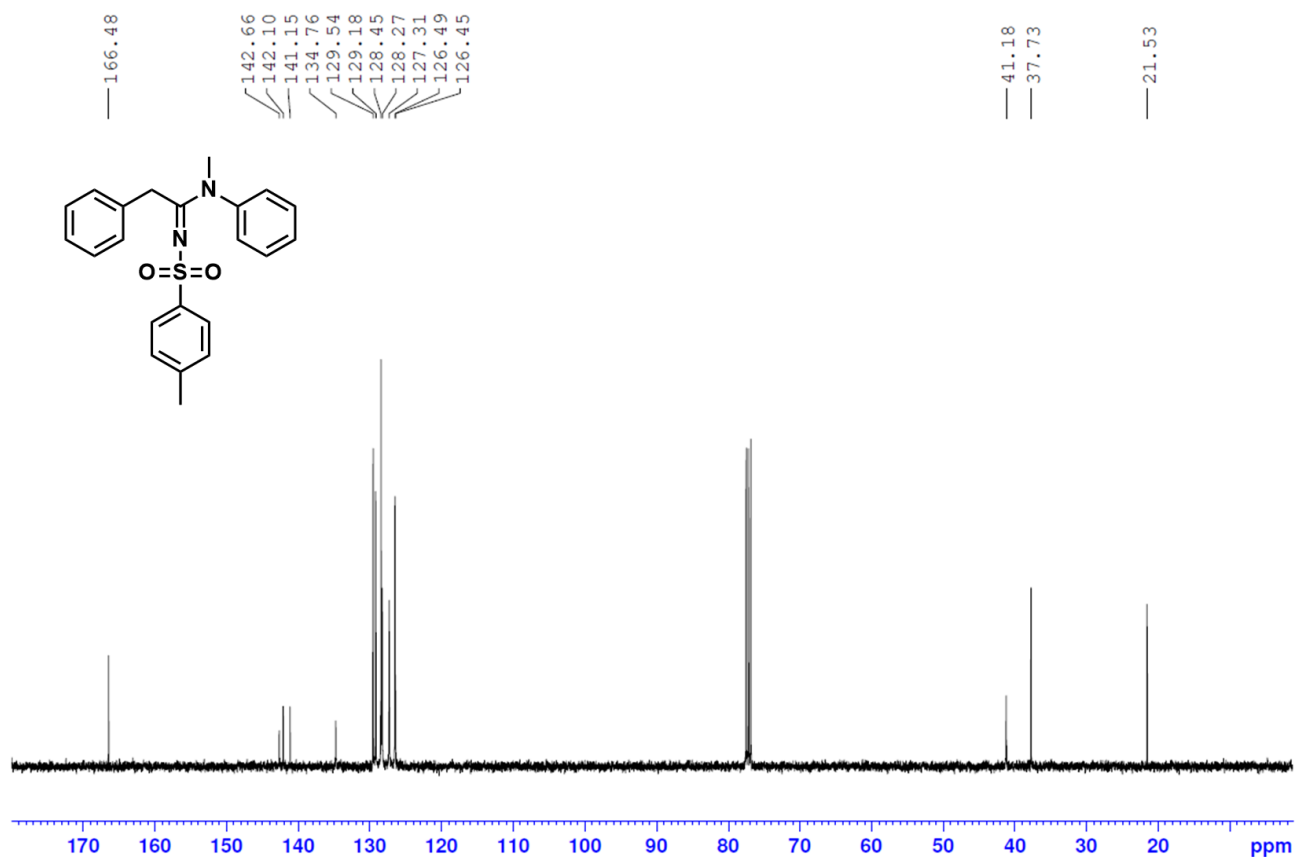

**<sup>1</sup>H NMR spectrum of 2-phenyl-*N*-propyl-*N*-((2,4,6-triisopropylphenyl)sulfonyl)acetimidamide**

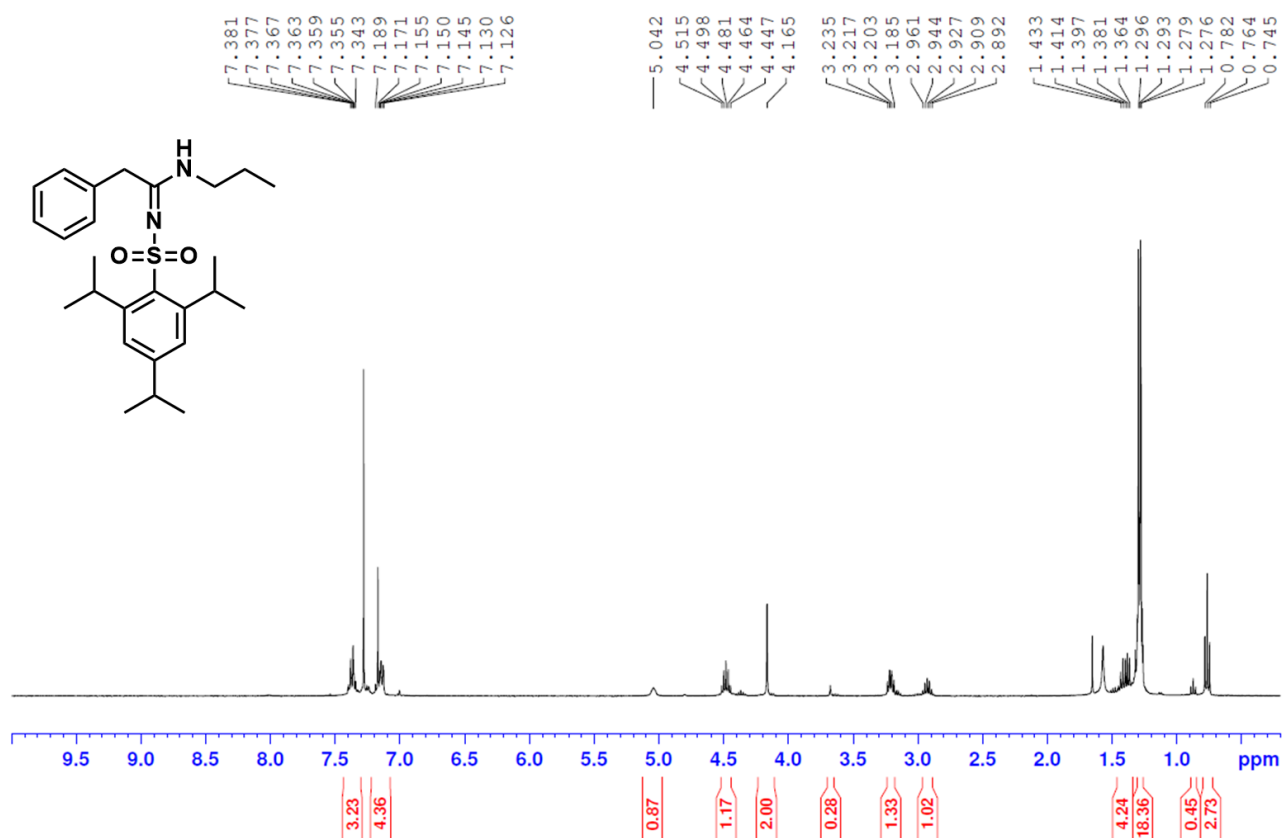

**<sup>13</sup>C NMR spectrum of 2-phenyl-*N*-propyl-*N*-((2,4,6-triisopropylphenyl)sulfonyl)acetimidamide**

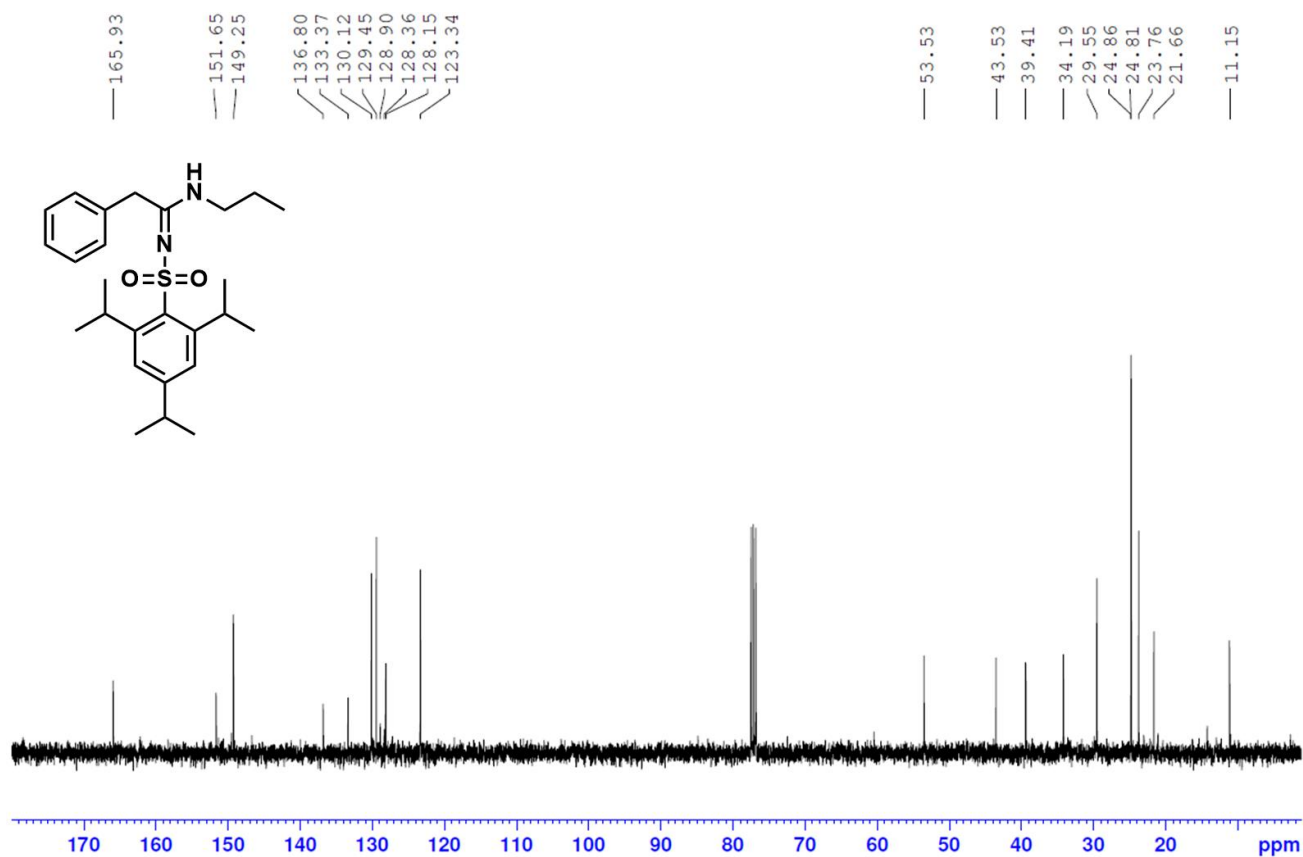

**<sup>1</sup>H NMR spectrum of *N*-(naphthalen-1-yl)-2-phenyl-*N*'-tosylacetimidamide**

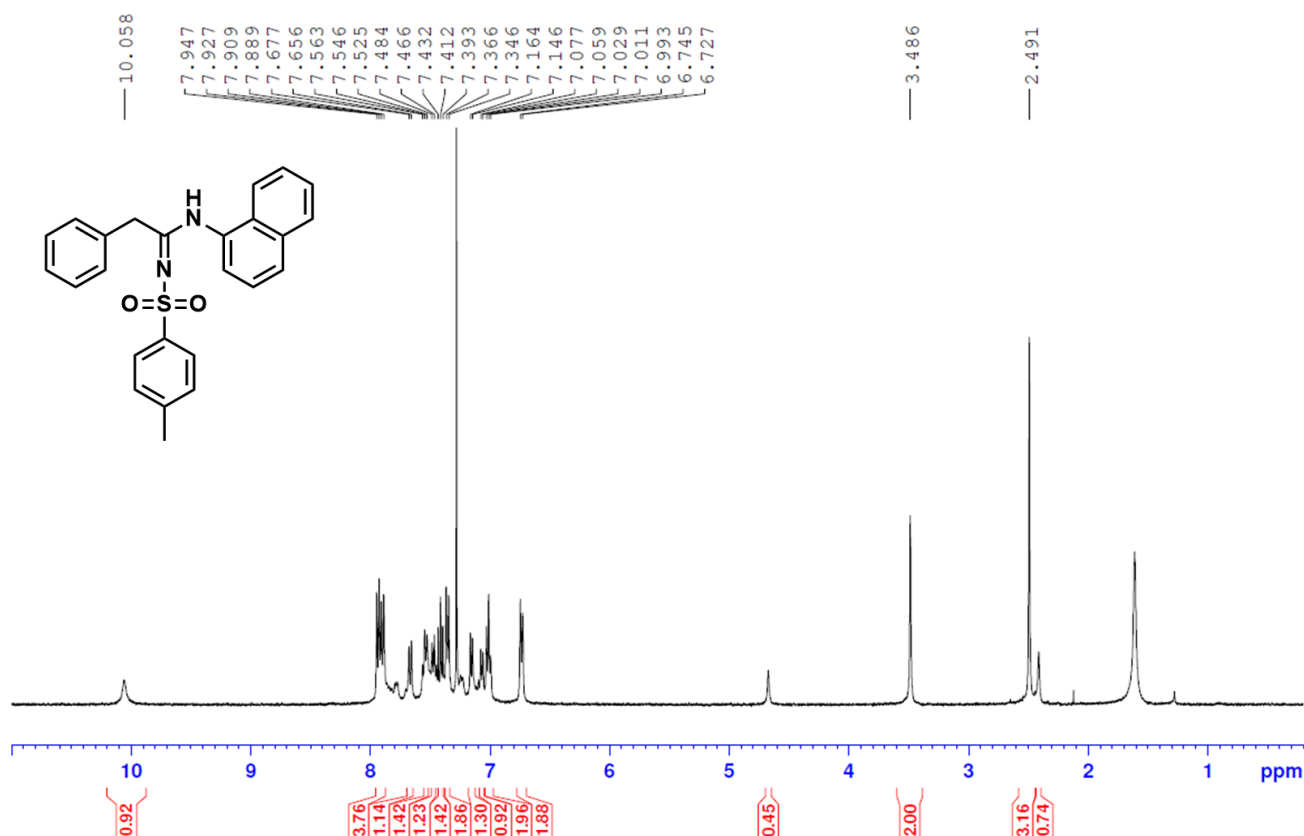

**<sup>13</sup>C NMR spectrum of *N*-(naphthalen-1-yl)-2-phenyl-*N*'-tosylacetimidamide**

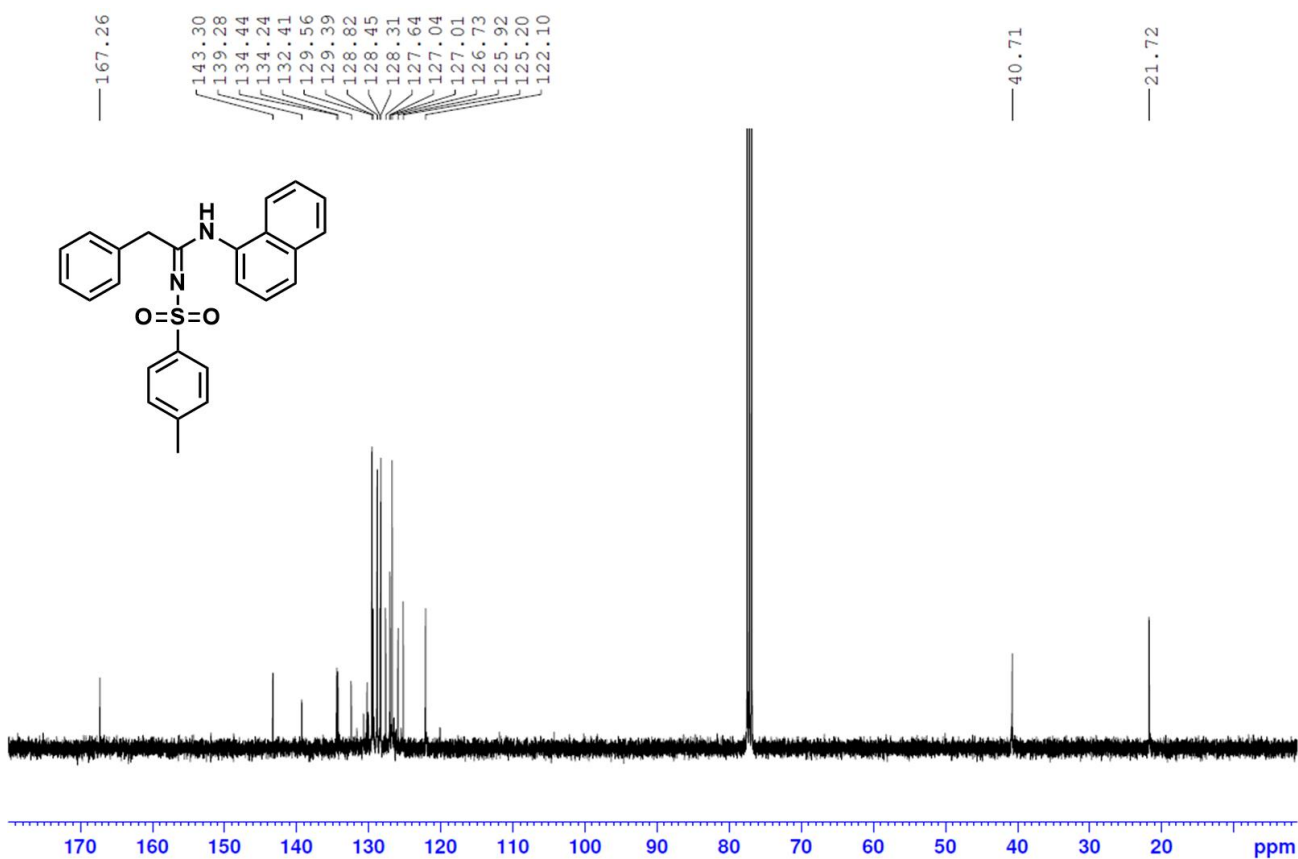

**<sup>1</sup>H NMR spectrum of *N*-(1-phenylethylidene)aniline**

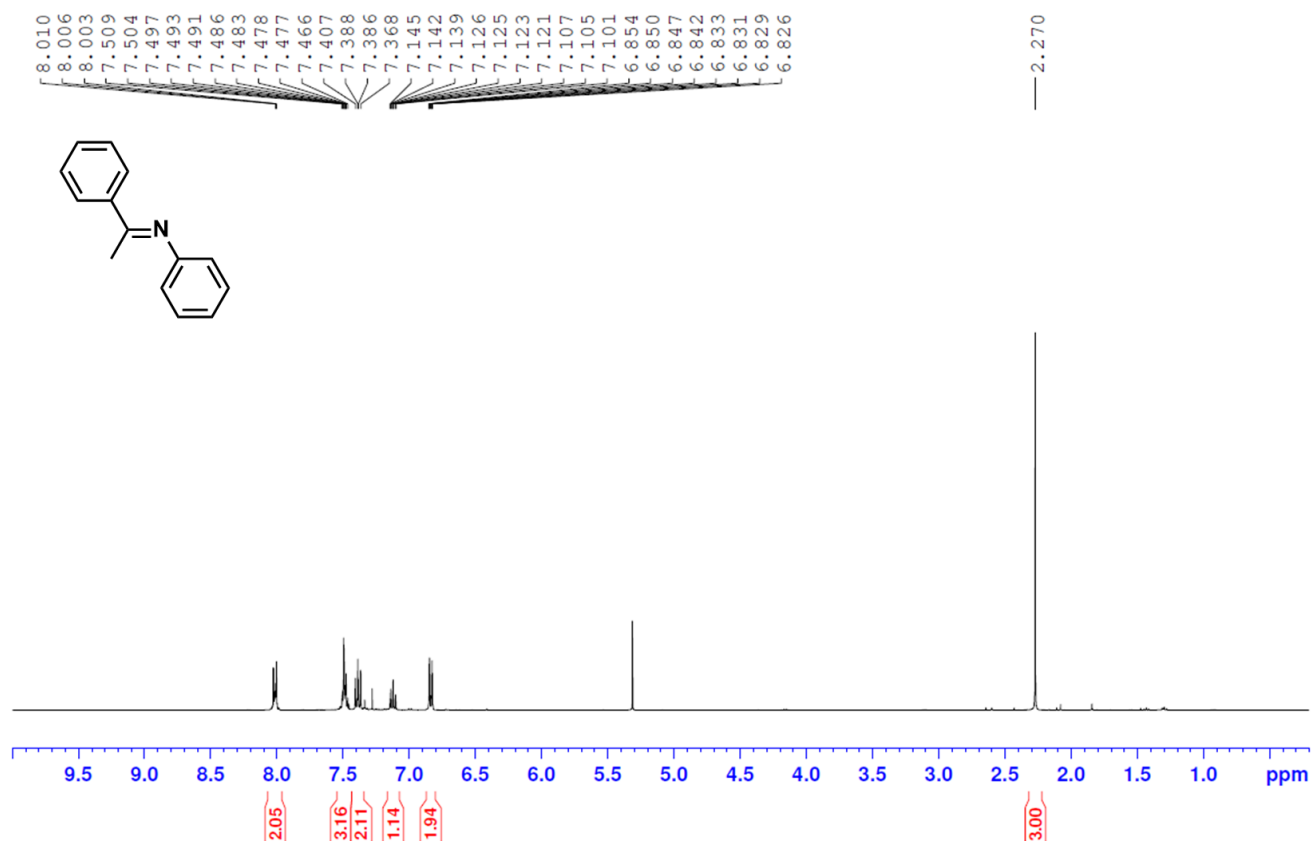

**<sup>13</sup>C NMR spectrum of *N*-(1-phenylethylidene)aniline**

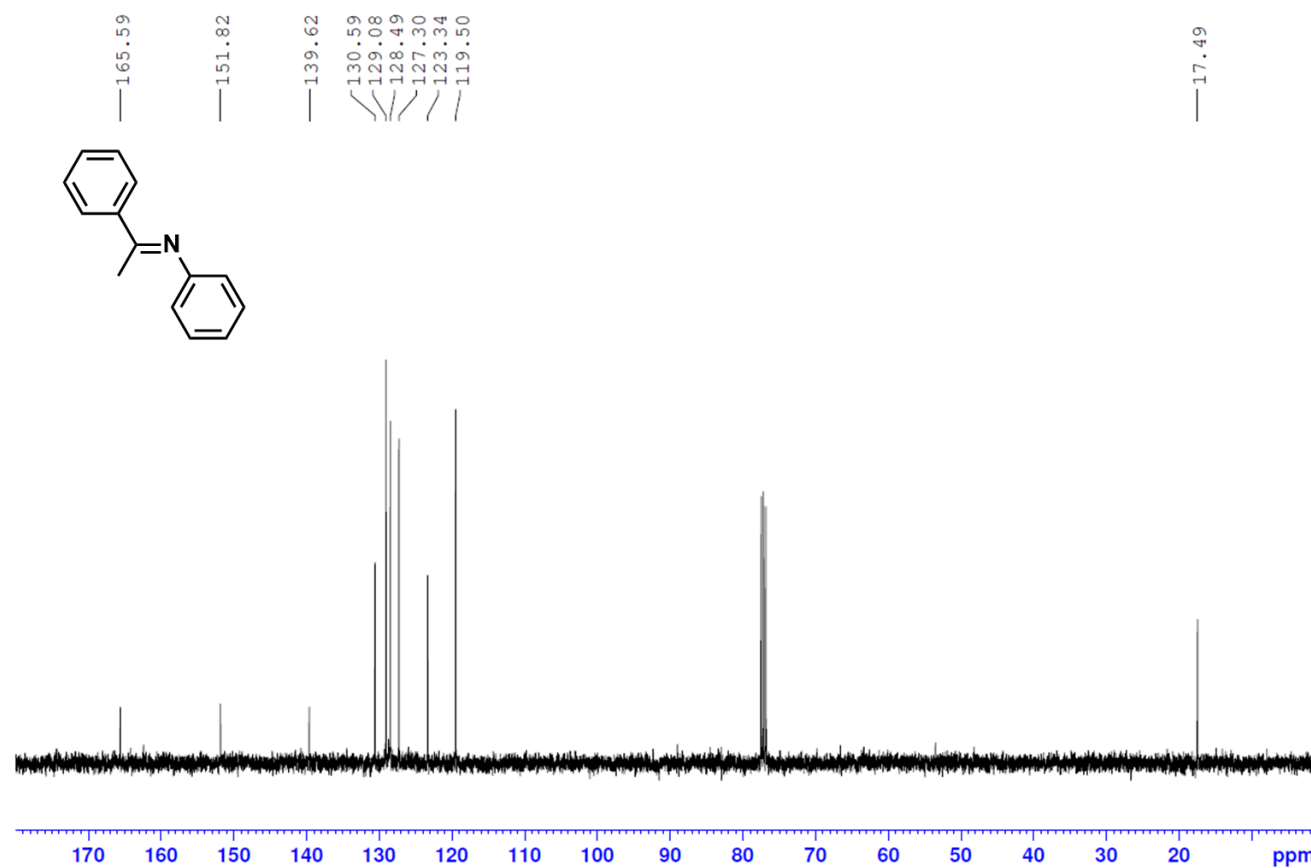

**<sup>1</sup>H NMR spectrum of 4-nitro-*N*-(1-phenylethylidene)aniline**

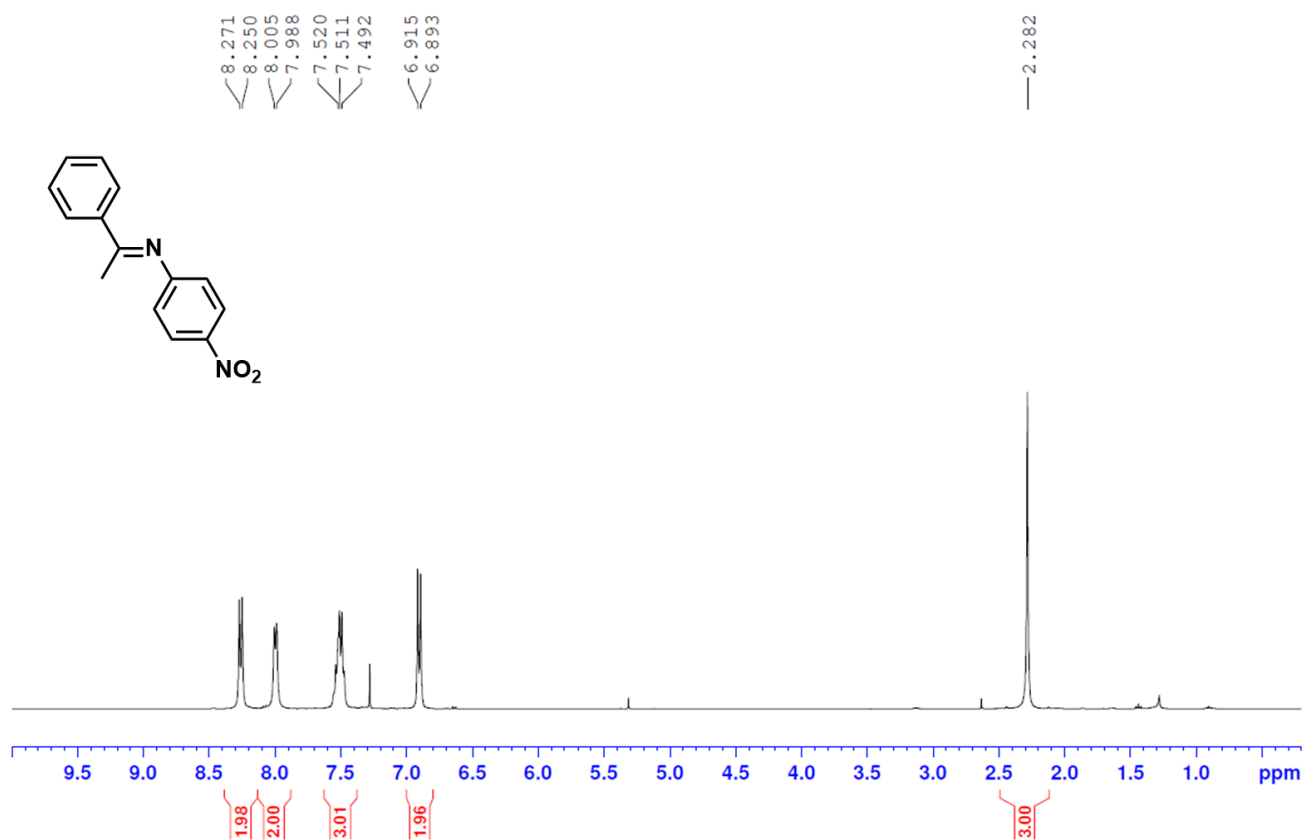

**<sup>13</sup>C NMR spectrum of 4-nitro-*N*-(1-phenylethylidene)aniline**

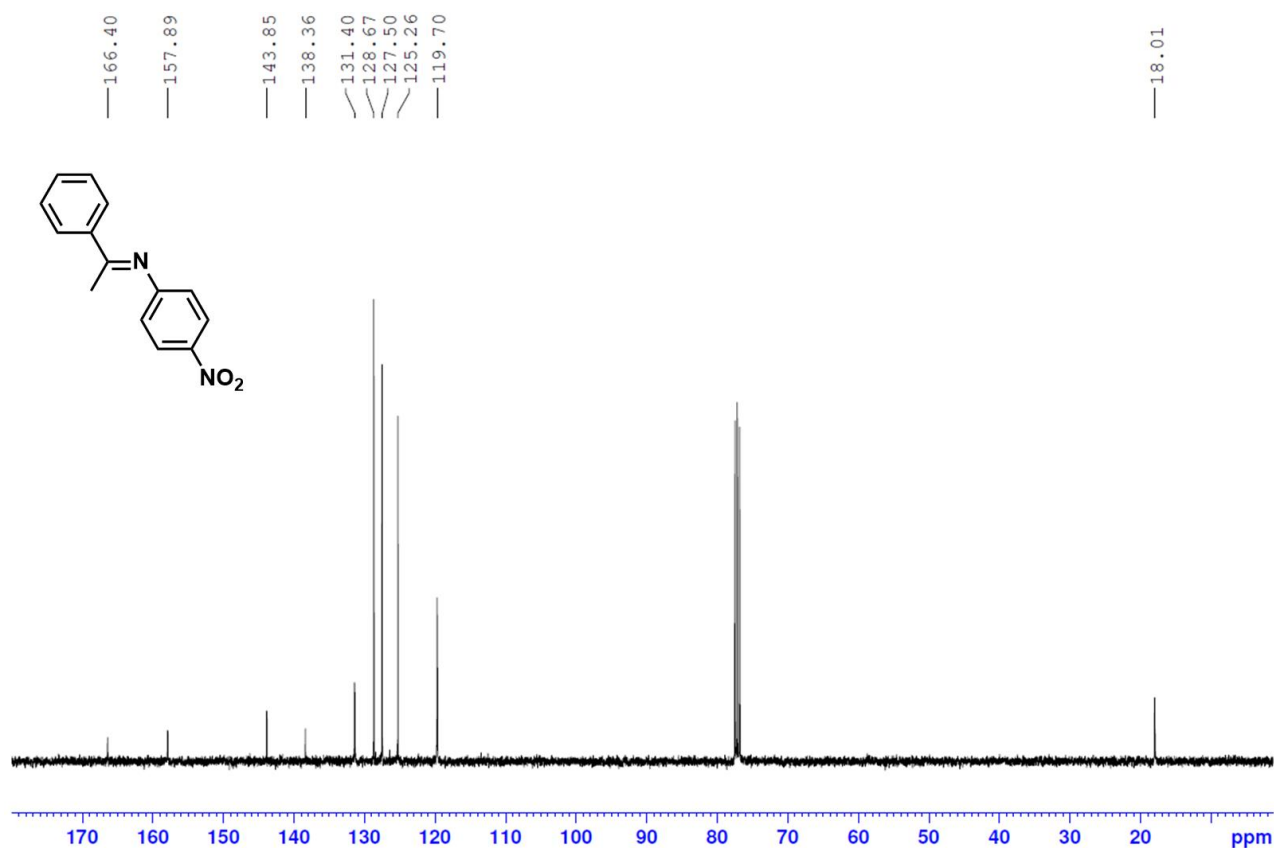



**<sup>1</sup>H NMR spectrum of 4-methoxy-*N*-(1-phenylethylidene)aniline**

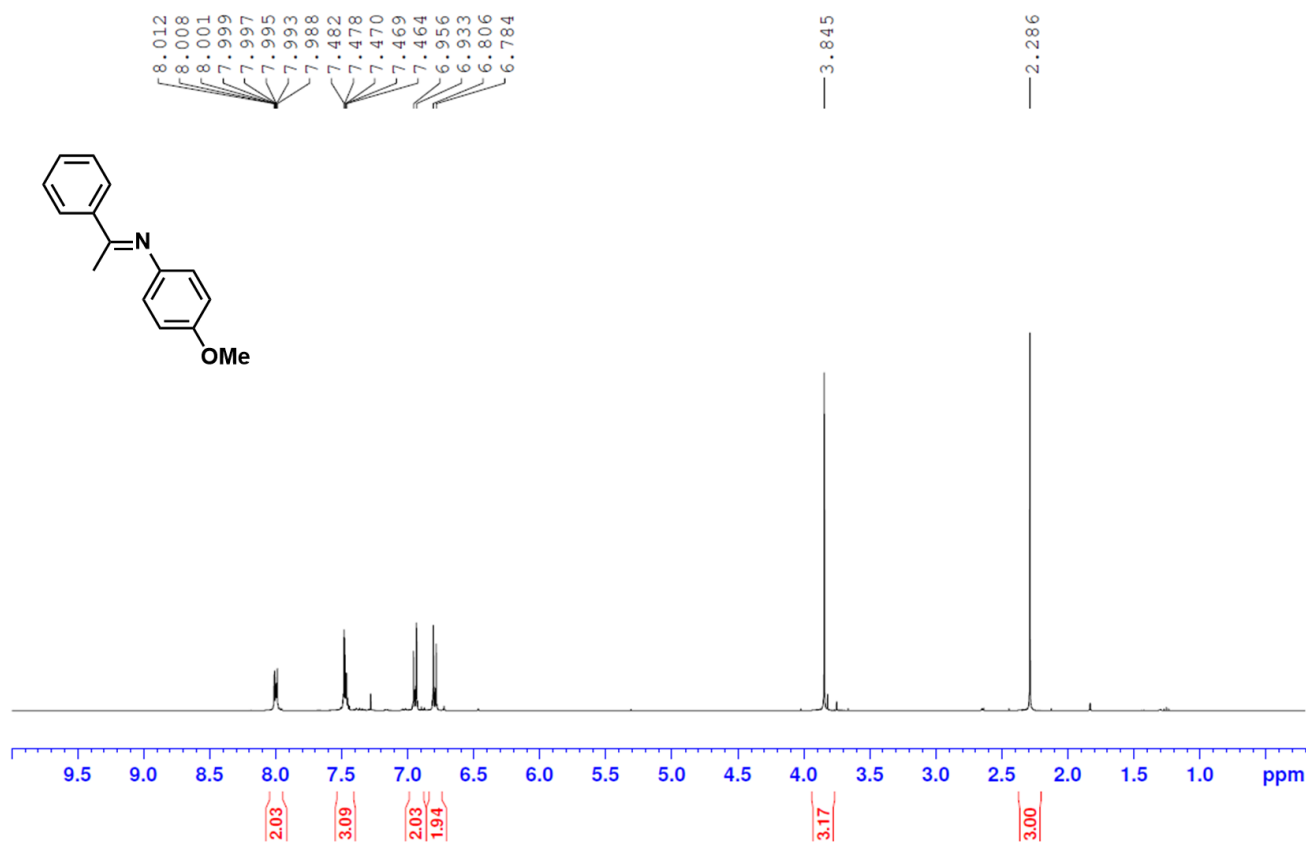

**<sup>13</sup>C NMR spectrum of 4-methoxy-*N*-(1-phenylethylidene)aniline**

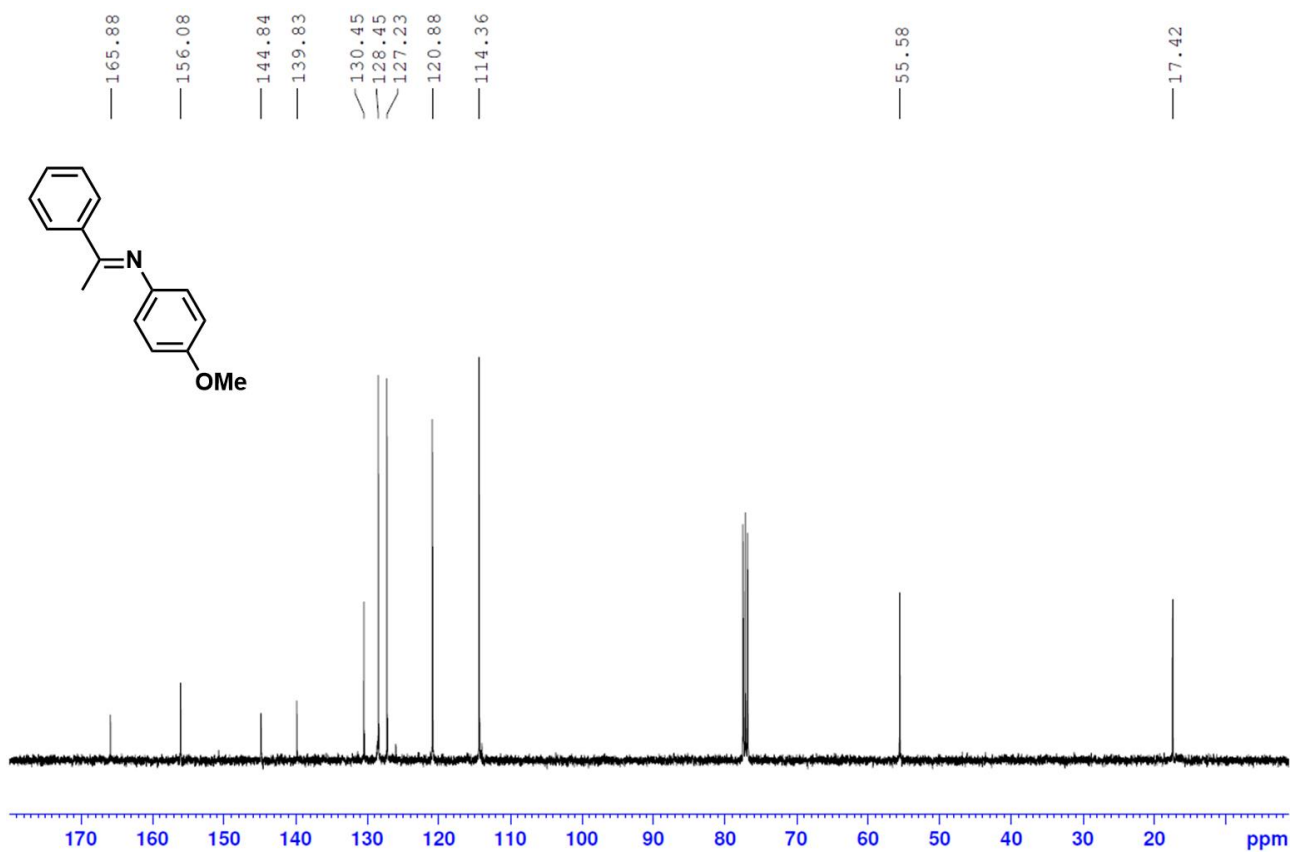

**<sup>1</sup>H NMR spectrum of *N*-(1-(4-nitrophenyl)ethylidene)aniline**

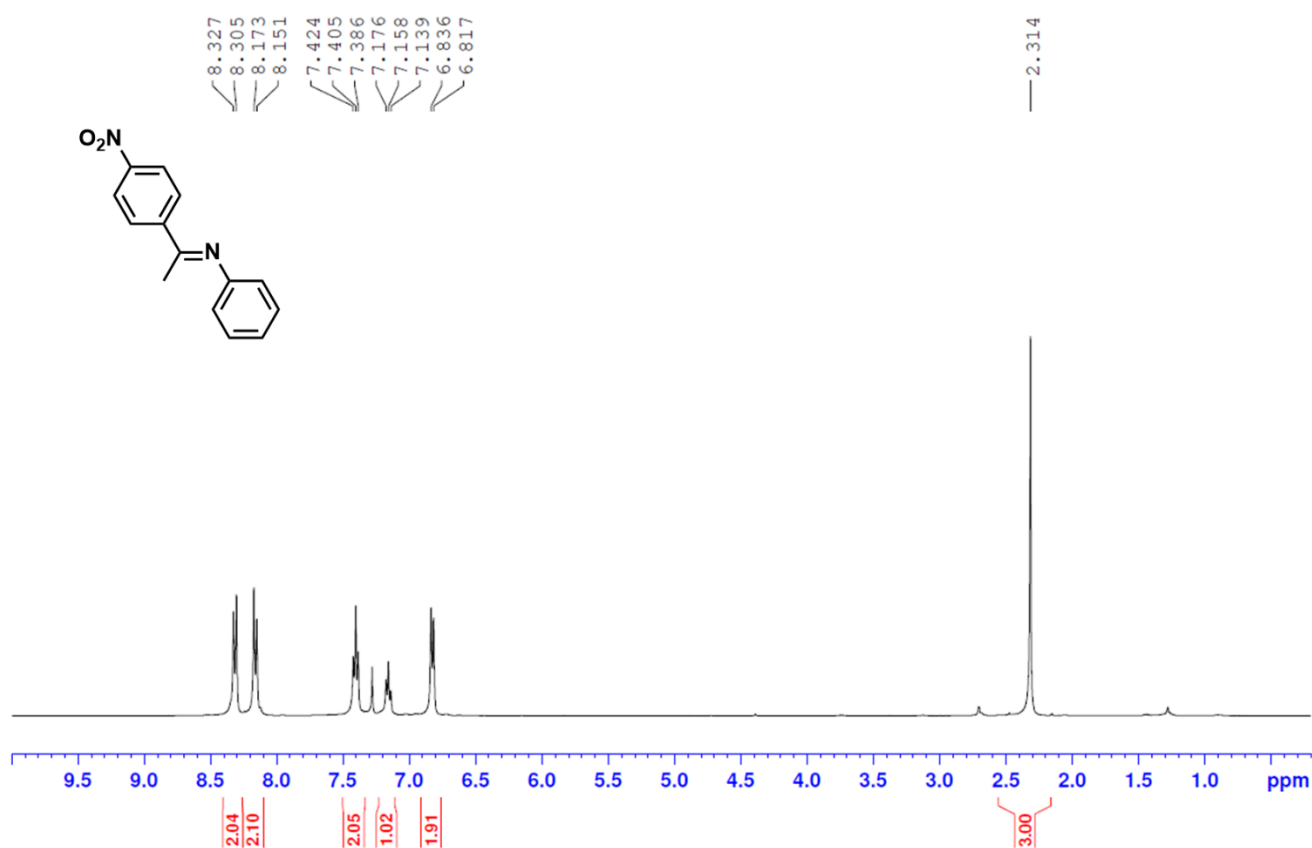

**<sup>13</sup>C NMR spectrum of *N*-(1-(4-nitrophenyl)ethylidene)aniline**

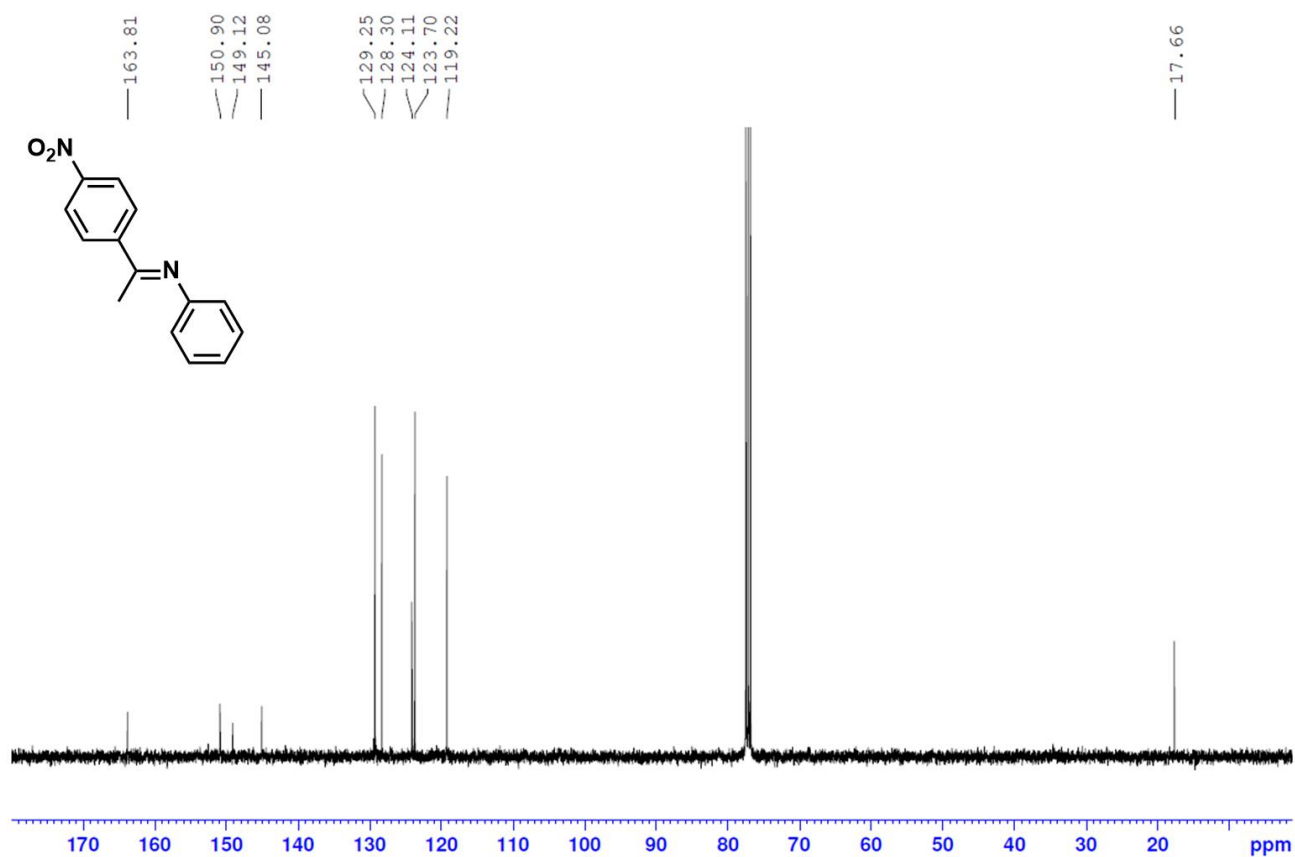

**<sup>1</sup>H NMR spectrum of *N*-(1-(4-methoxyphenyl)ethylidene)aniline**

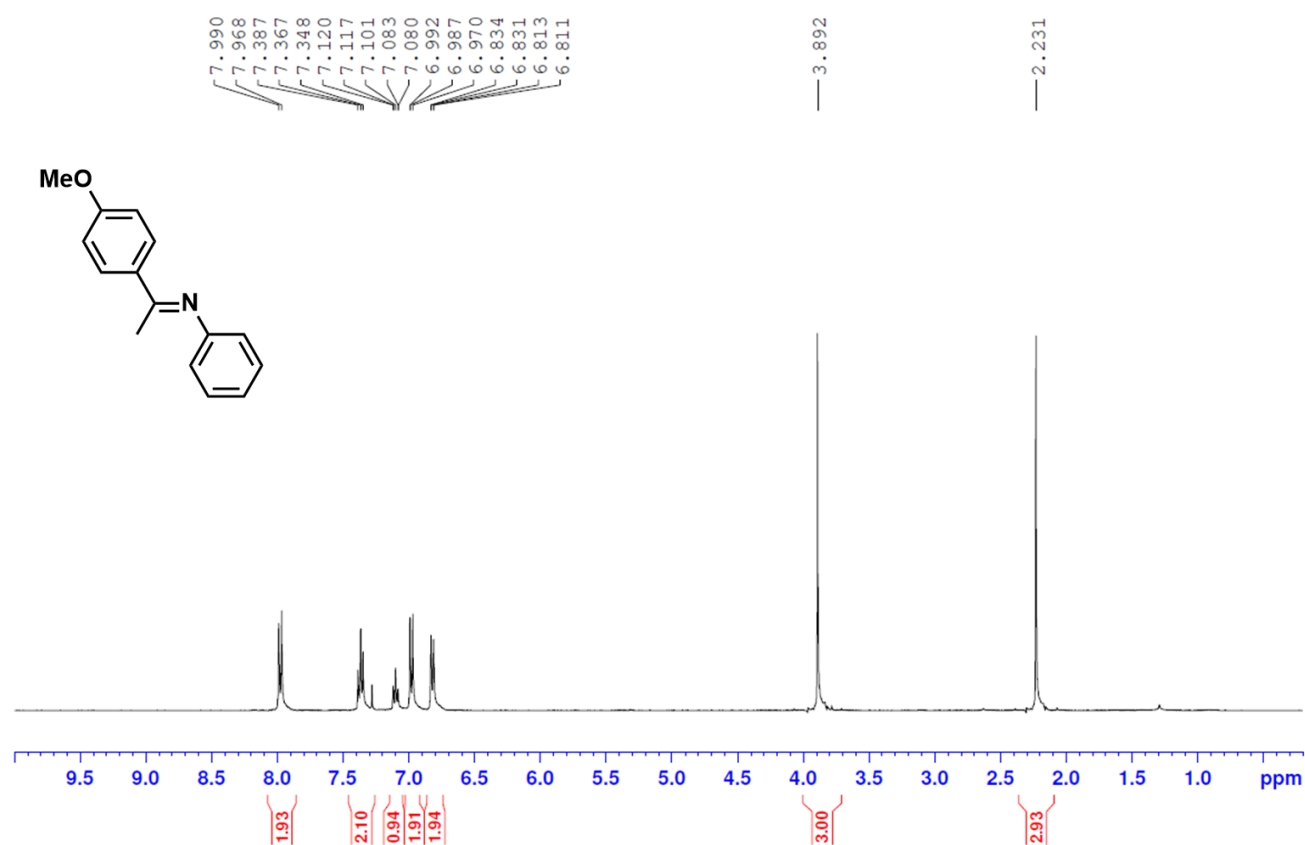

**<sup>13</sup>C NMR spectrum of *N*-(1-(4-methoxyphenyl)ethylidene)aniline**

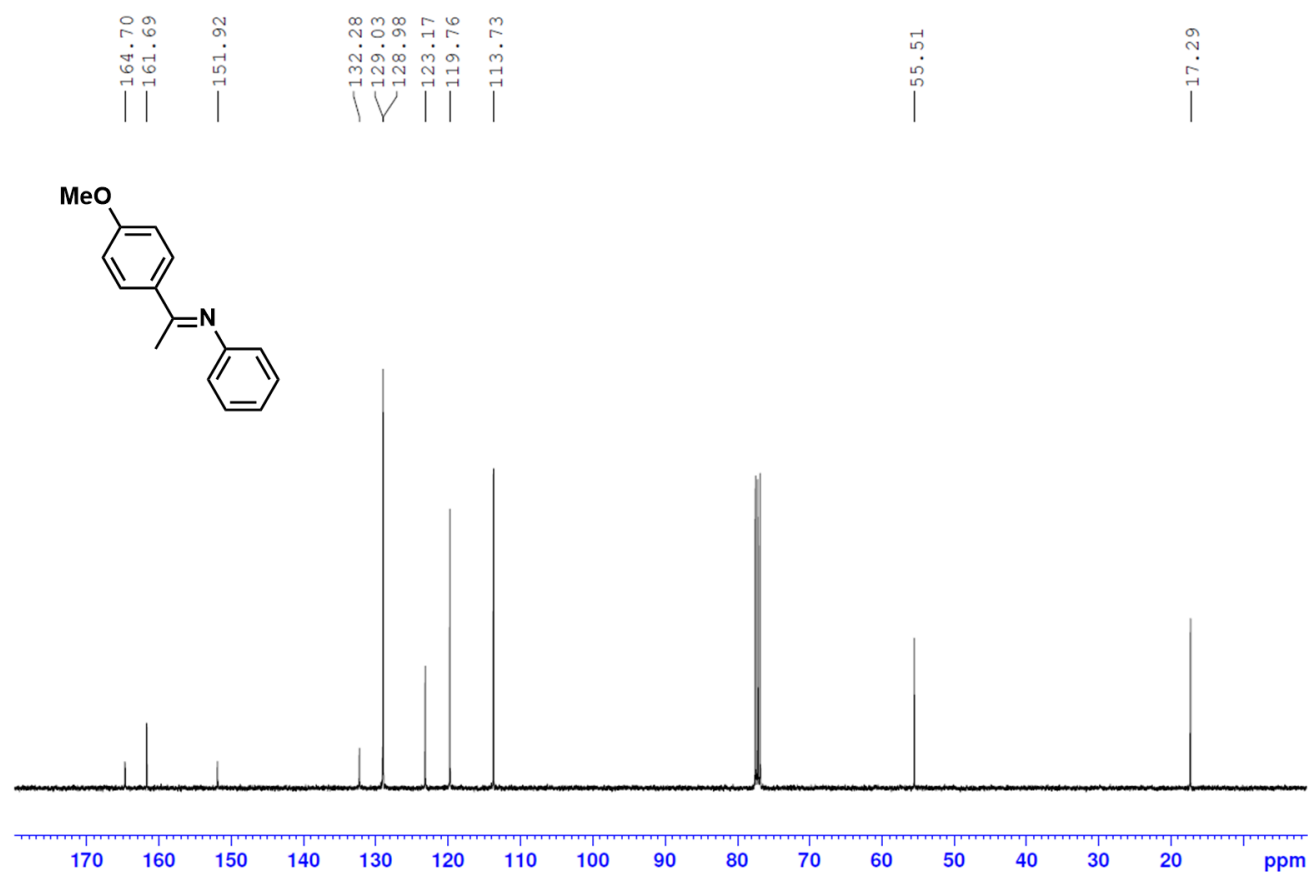

**<sup>1</sup>H NMR spectrum of 4-(*tert*-butyl)-*N*-(1-phenylethylidene)aniline**

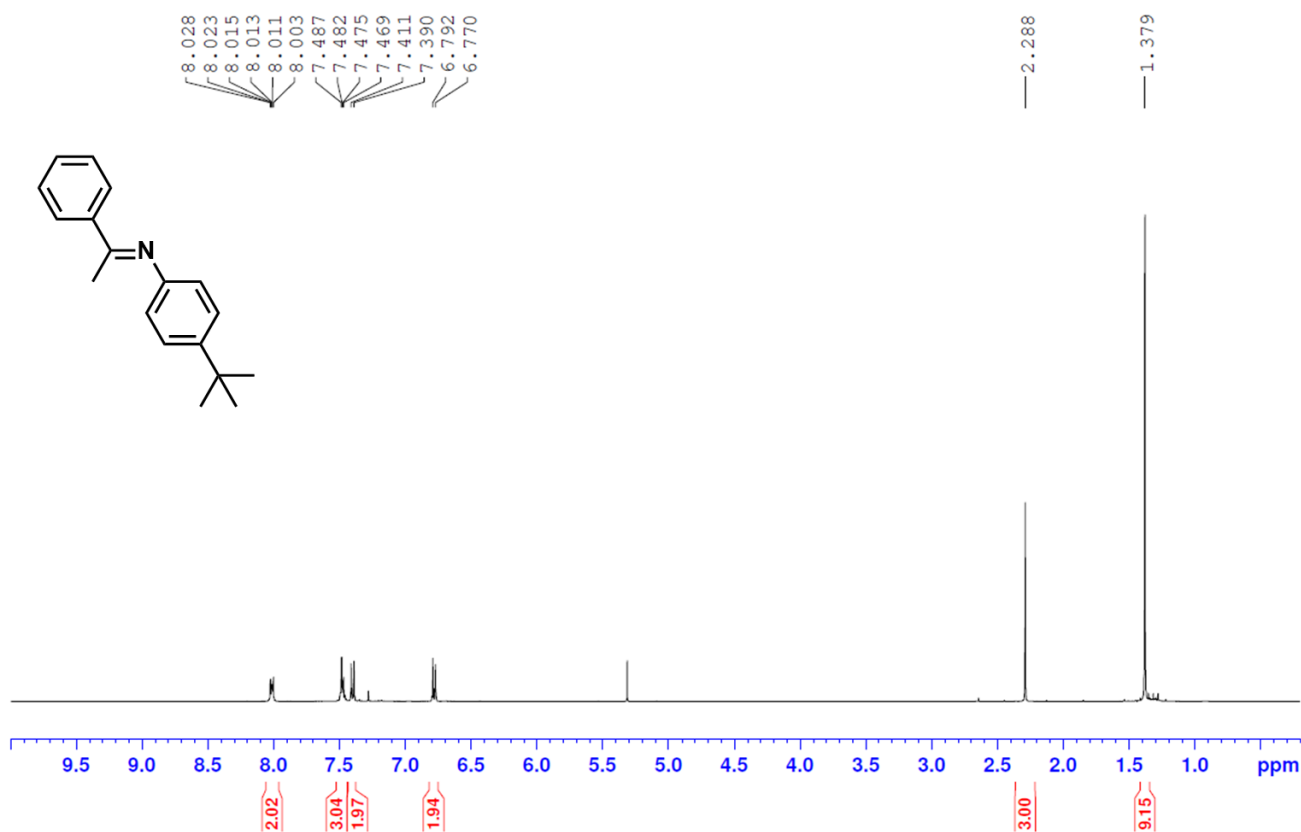

**<sup>13</sup>C NMR spectrum of 4-(*tert*-butyl)-*N*-(1-phenylethylidene)aniline**

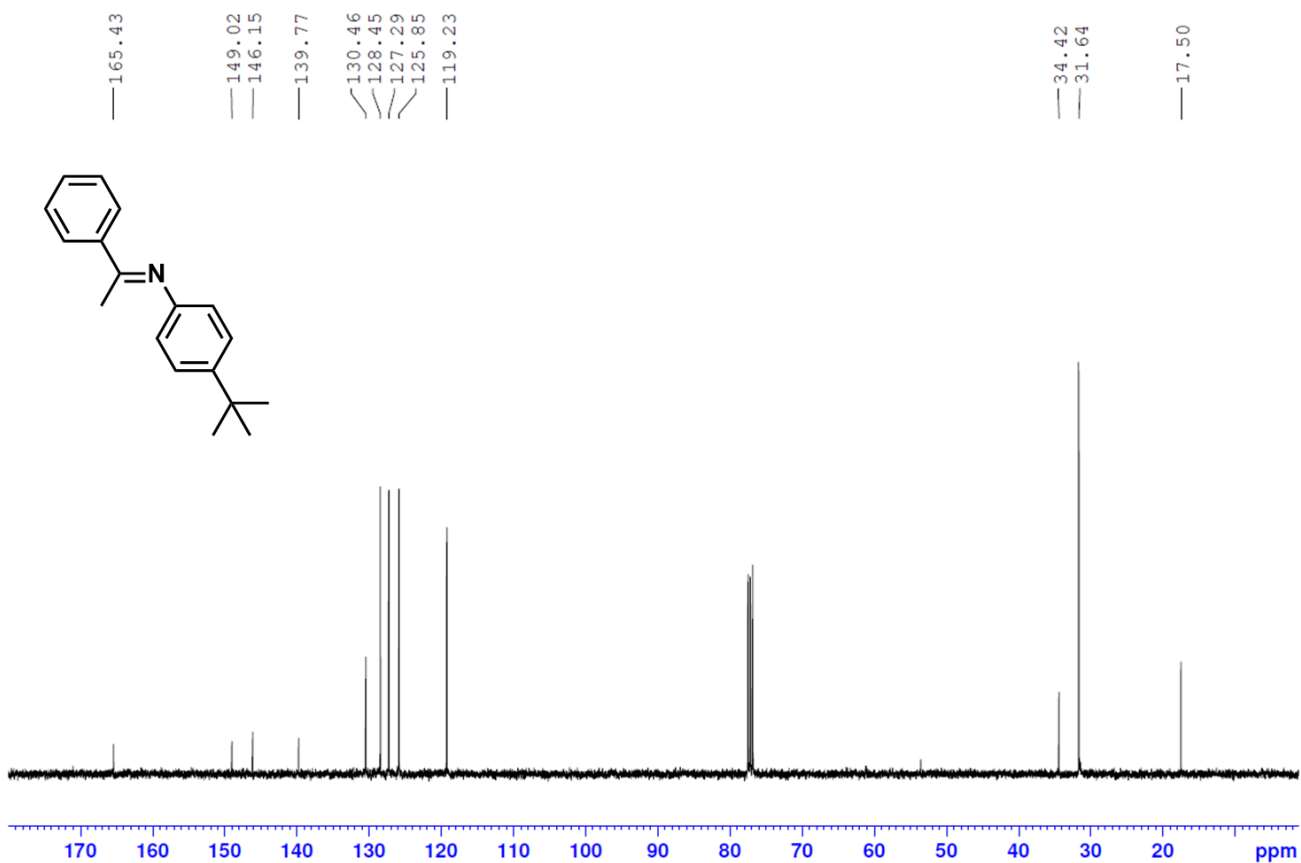

**<sup>1</sup>H NMR spectrum of 2,6-diisopropyl-*N*-(1-phenylethylidene)aniline**

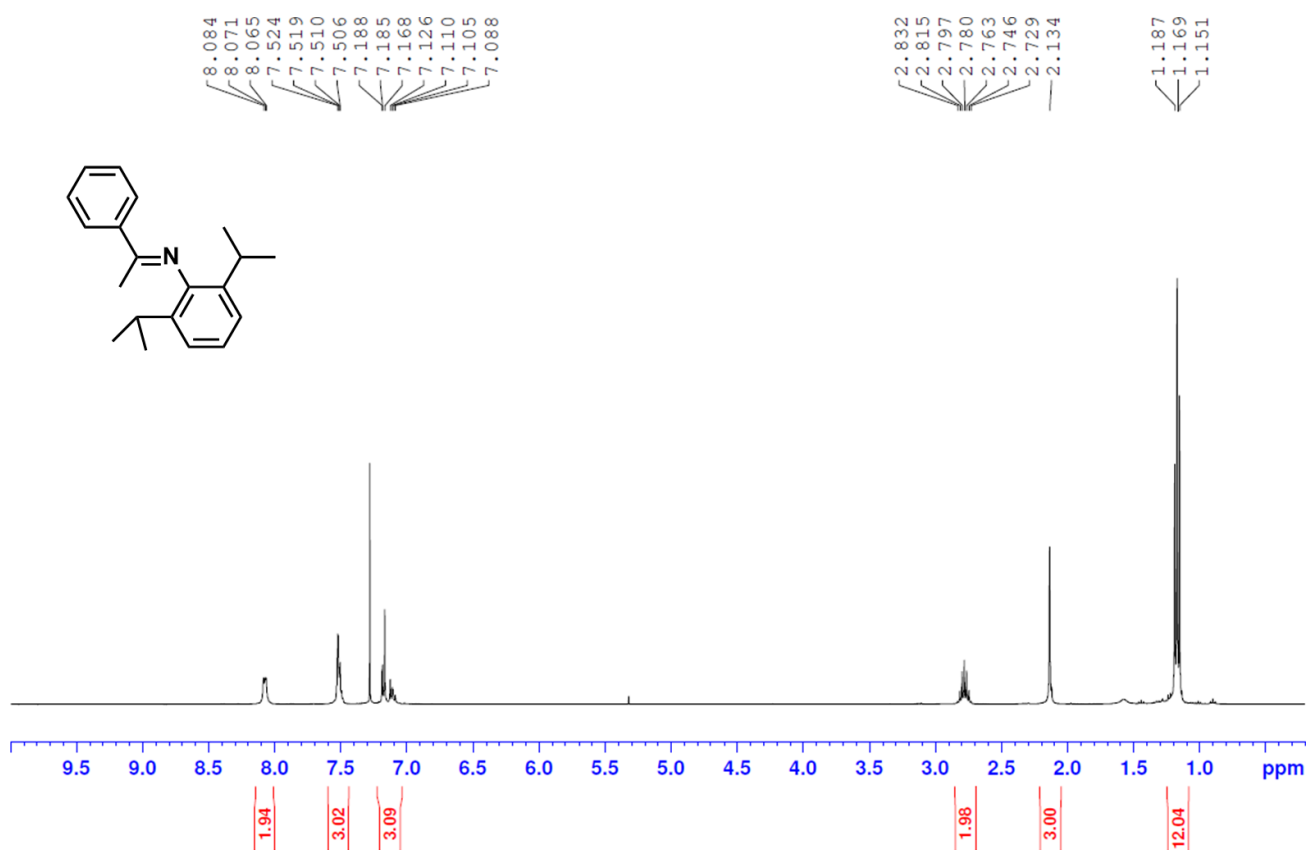

**<sup>13</sup>C NMR spectrum of 2,6-diisopropyl-*N*-(1-phenylethylidene)aniline**

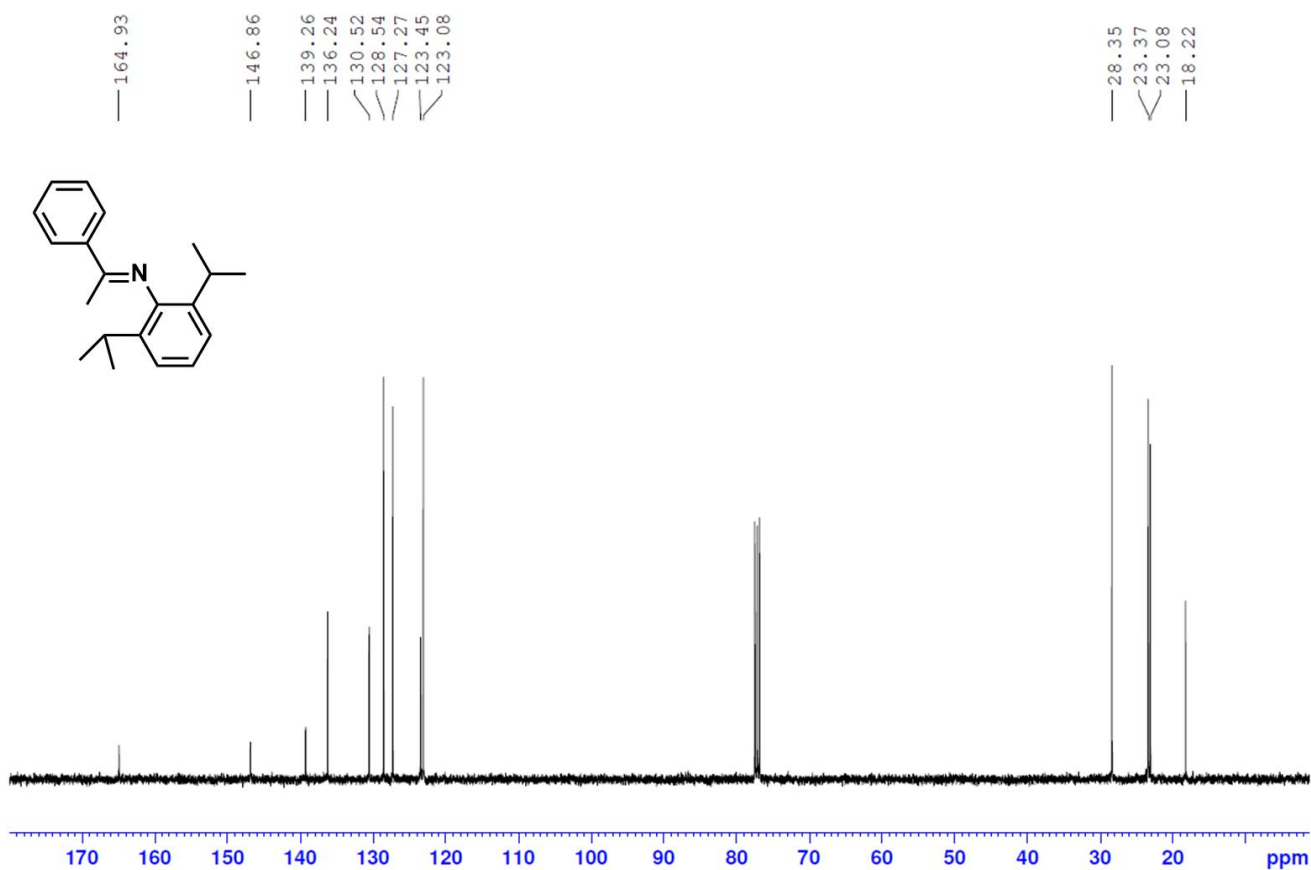

**<sup>1</sup>H NMR spectrum of *N*-(1-phenylethylidene)naphthalen-1-amine**

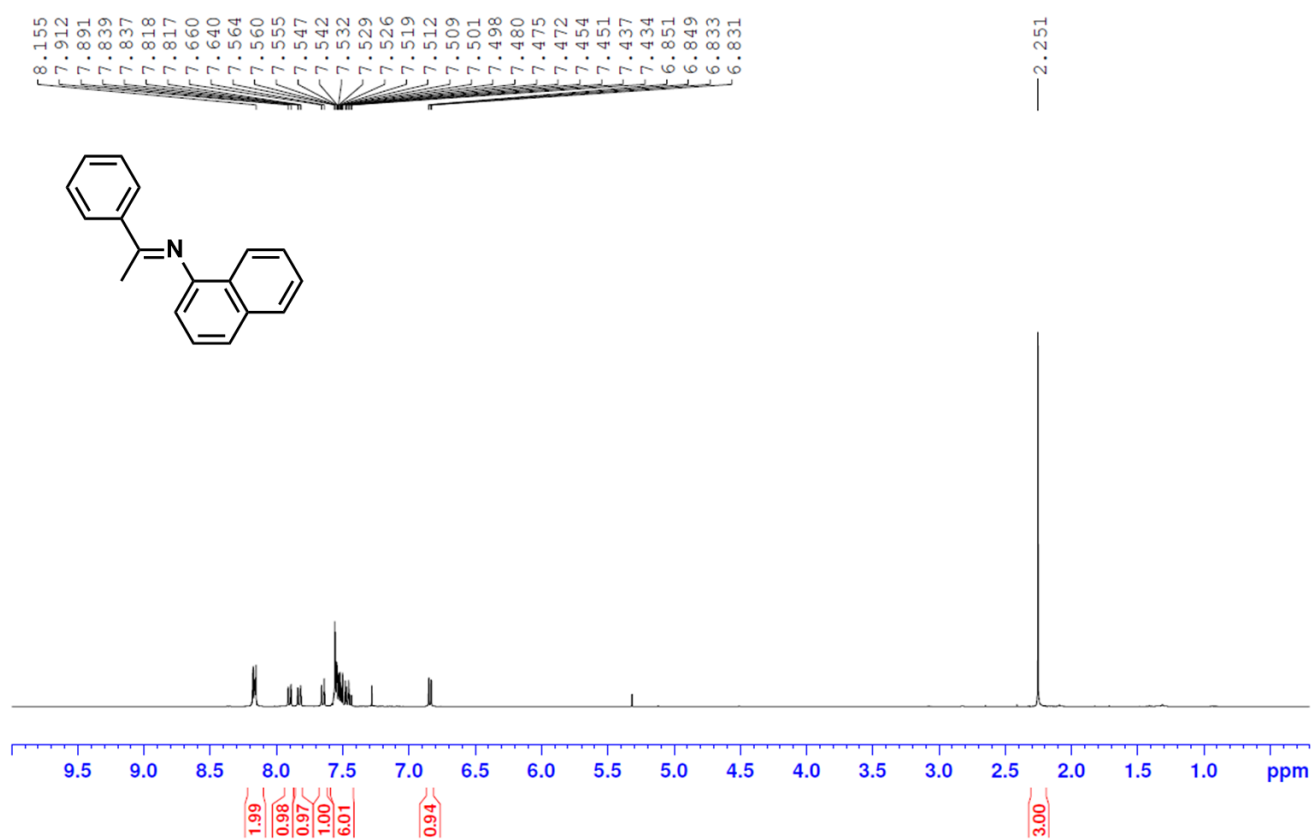

**<sup>13</sup>C NMR spectrum of *N*-(1-phenylethylidene)naphthalen-1-amine**

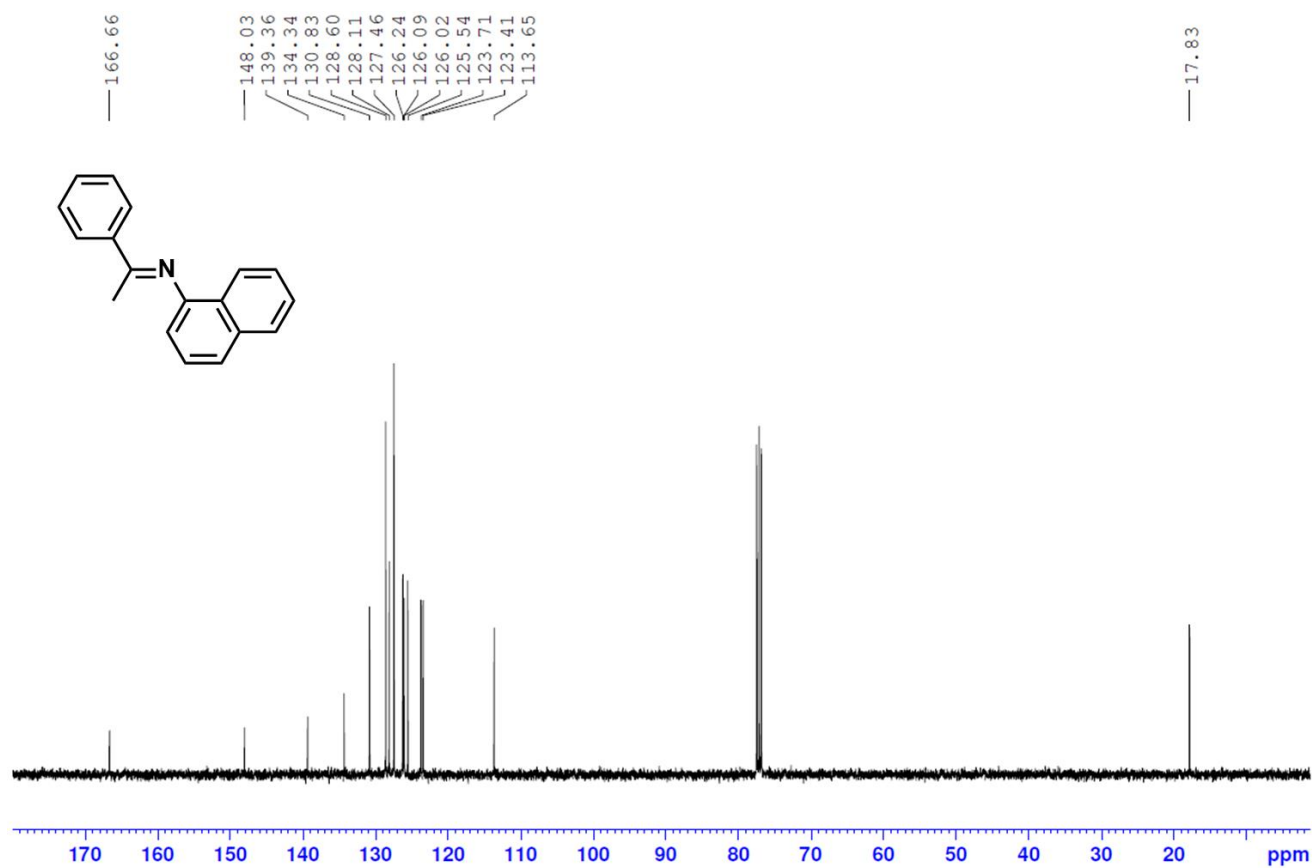

**<sup>1</sup>H NMR spectrum of 1-benzyl-4-(4-(trifluoromethyl)phenyl)-1*H*-1,2,3-triazole**

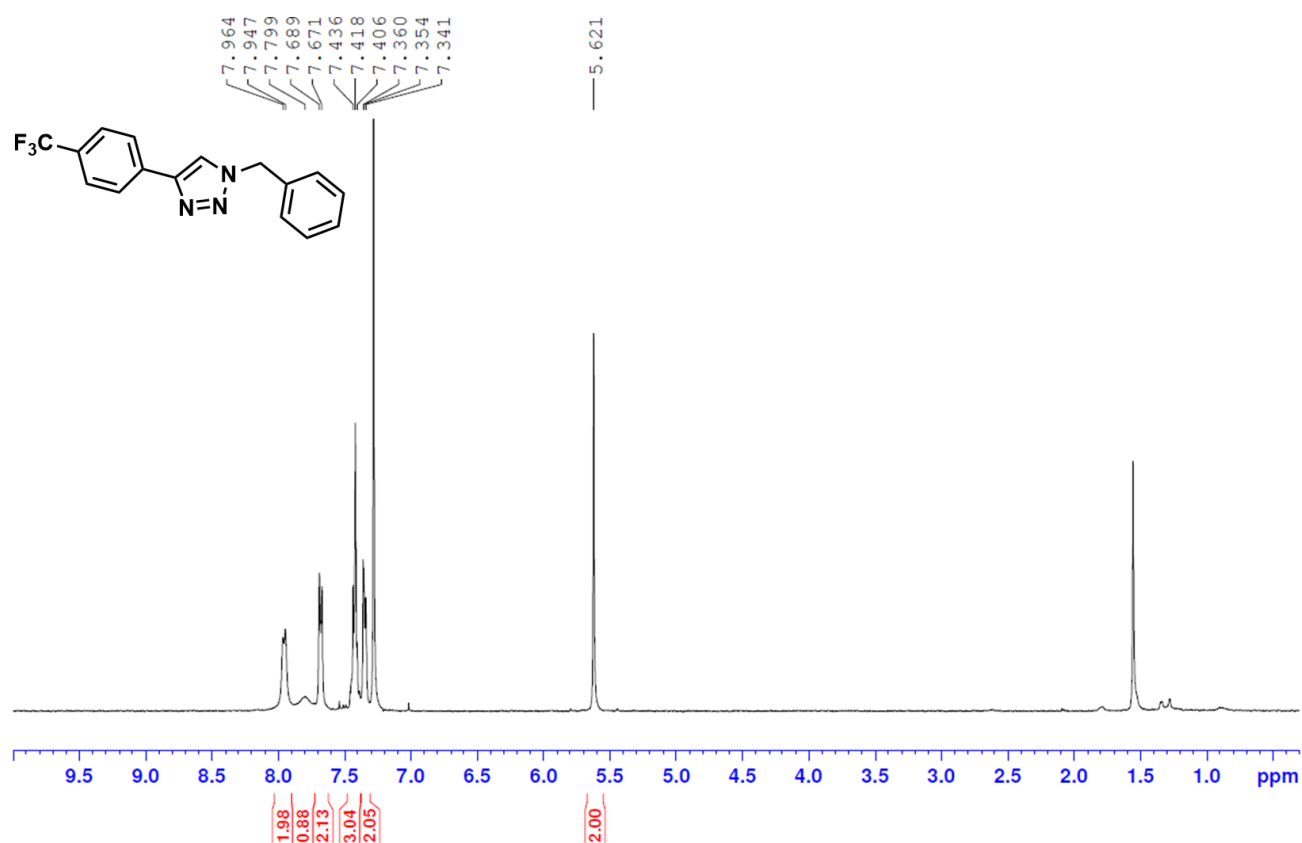

**<sup>13</sup>C NMR spectrum of 1-benzyl-4-(4-(trifluoromethyl)phenyl)-1*H*-1,2,3-triazole**

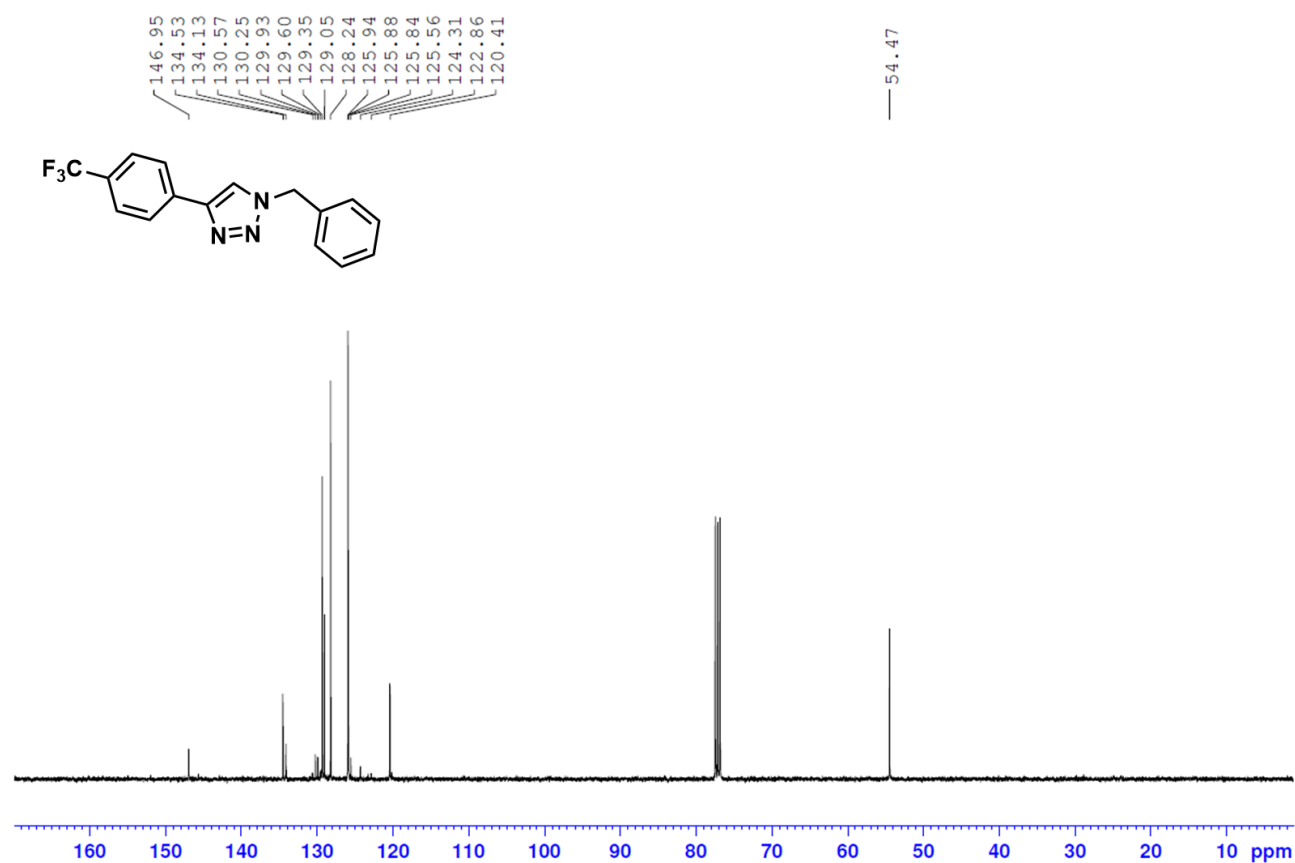

**<sup>1</sup>H NMR spectrum of 1-benzyl-4-(*p*-tolyl)-1*H*-1,2,3-triazole**

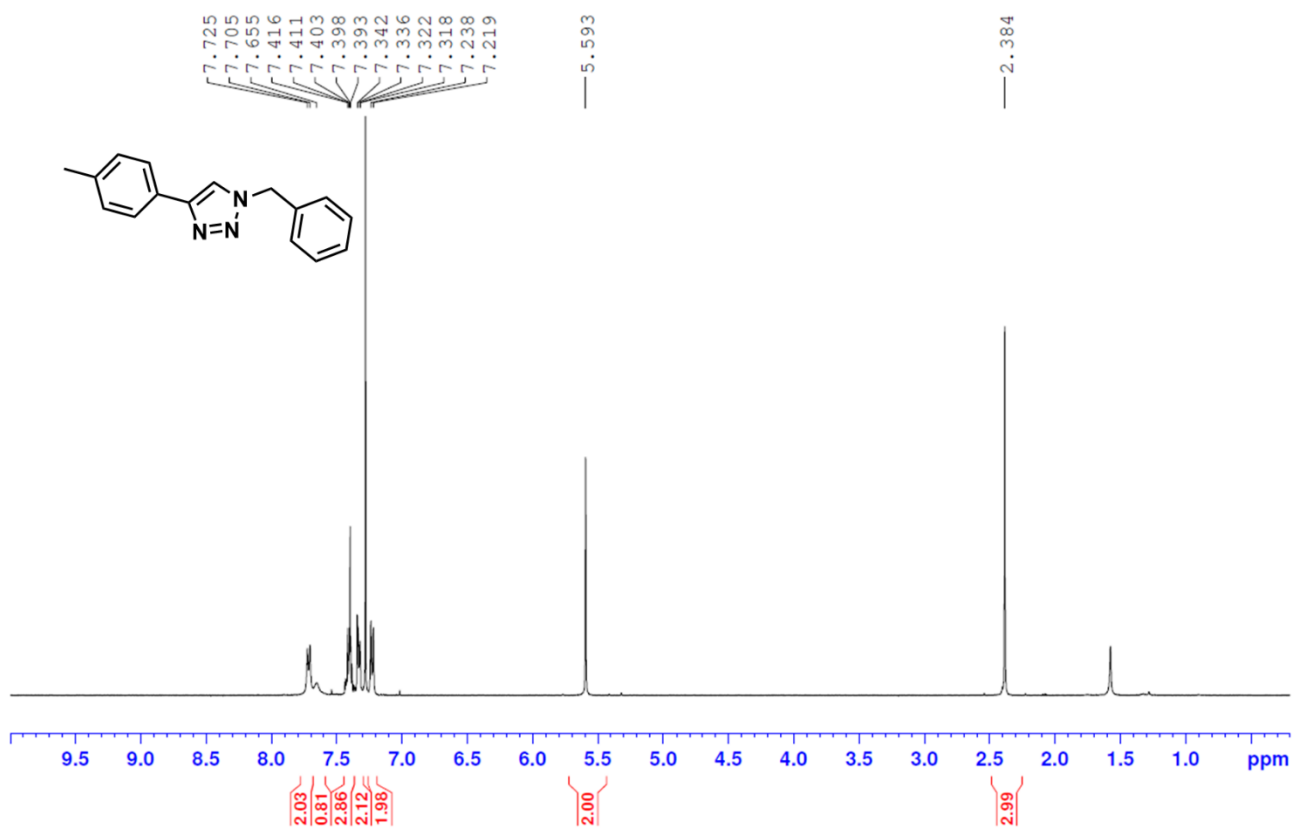

**<sup>13</sup>C NMR spectrum of 1-benzyl-4-(*p*-tolyl)-1*H*-1,2,3-triazole**

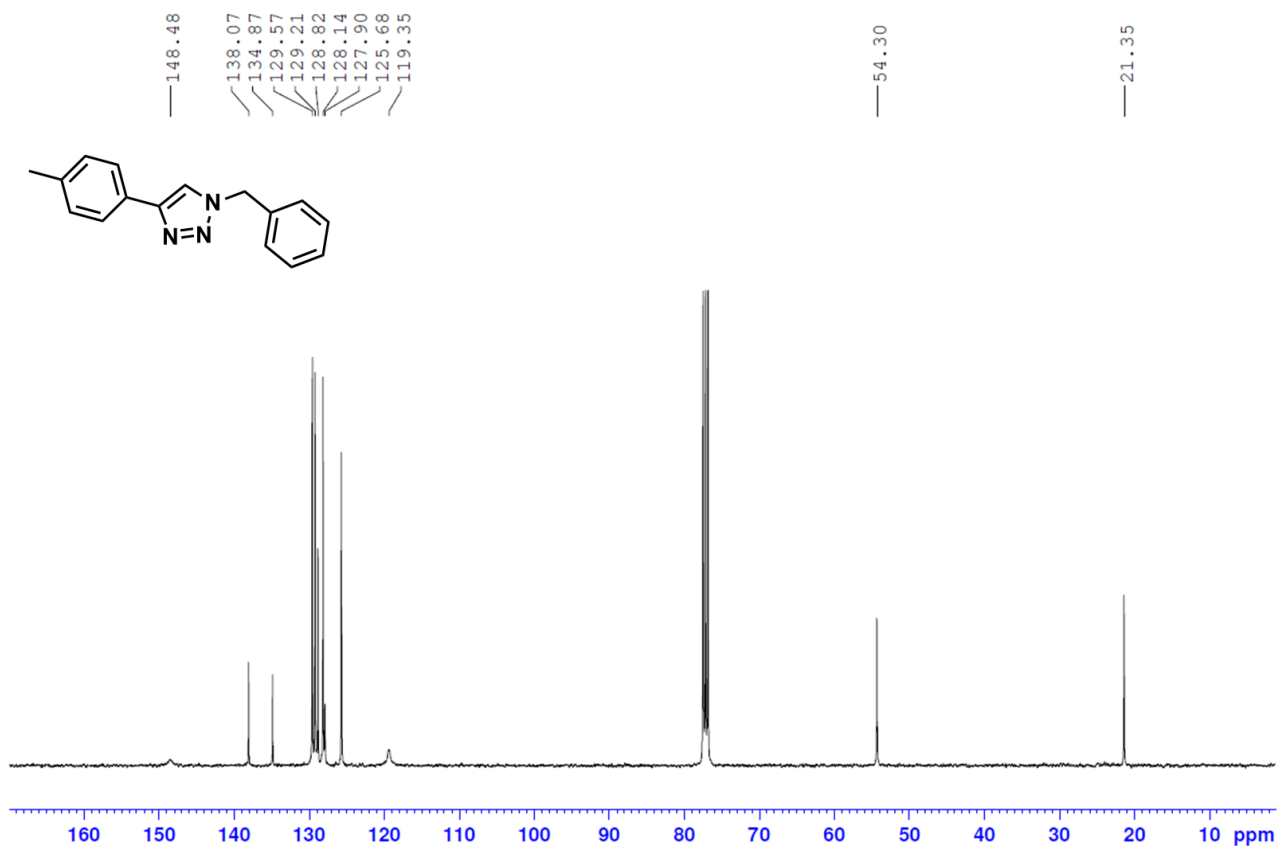



**<sup>1</sup>H NMR spectrum of 1-(4-methylbenzyl)-4-phenyl-1*H*-1,2,3-triazole**

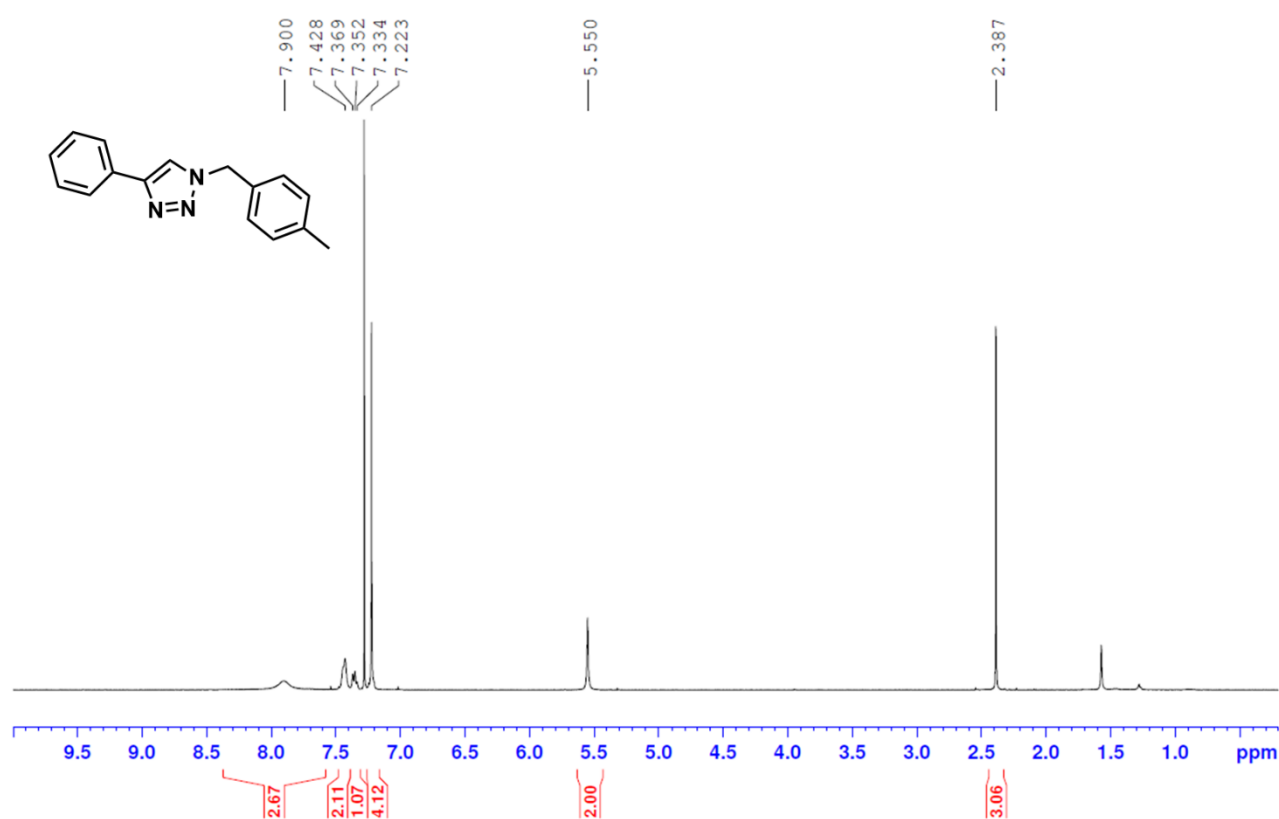

**<sup>13</sup>C NMR spectrum of 1-(4-methylbenzyl)-4-phenyl-1*H*-1,2,3-triazole**

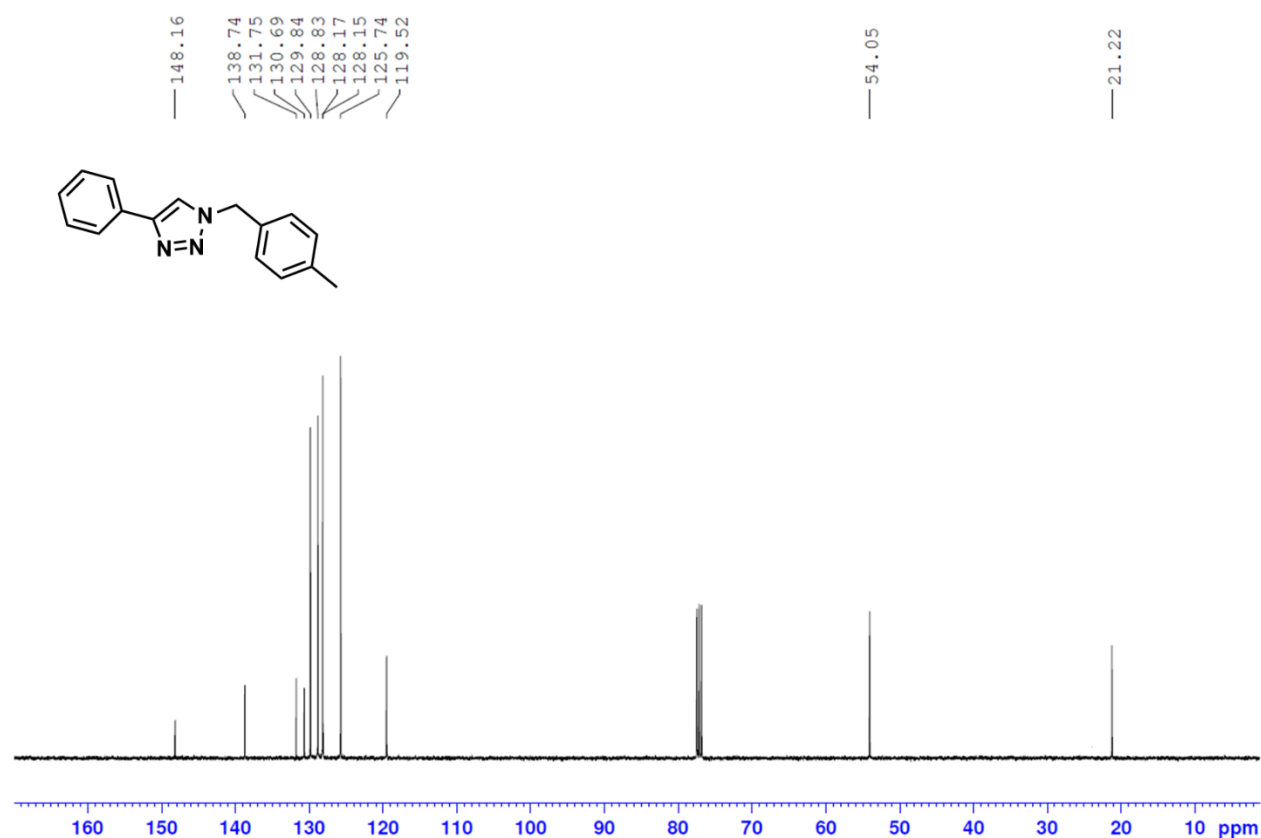

**<sup>1</sup>H NMR spectrum of 4-phenyl-1-(4-(trifluoromethyl)benzyl)-1*H*-1,2,3-triazole**

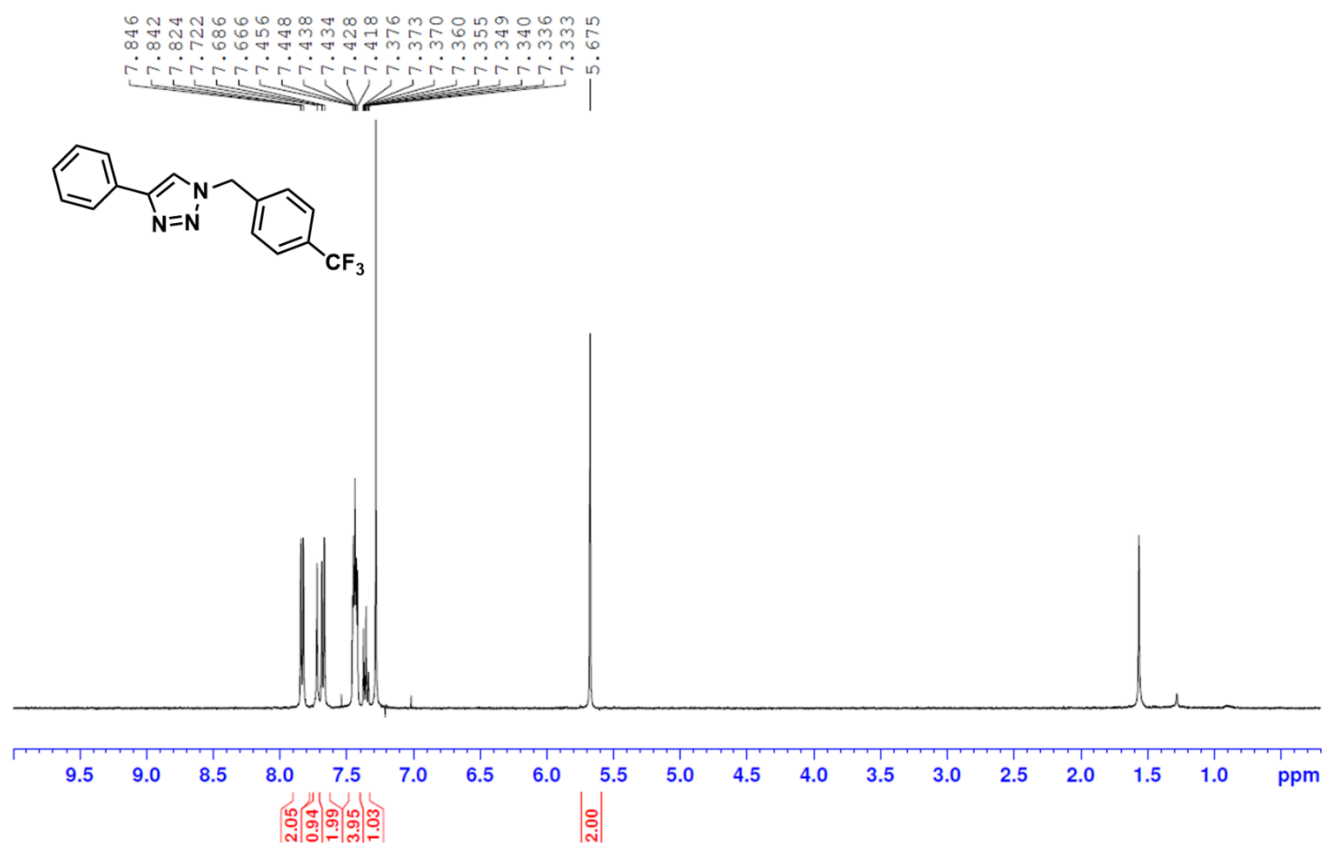

**<sup>13</sup>C NMR spectrum of 4-phenyl-1-(4-(trifluoromethyl)benzyl)-1*H*-1,2,3-triazole**

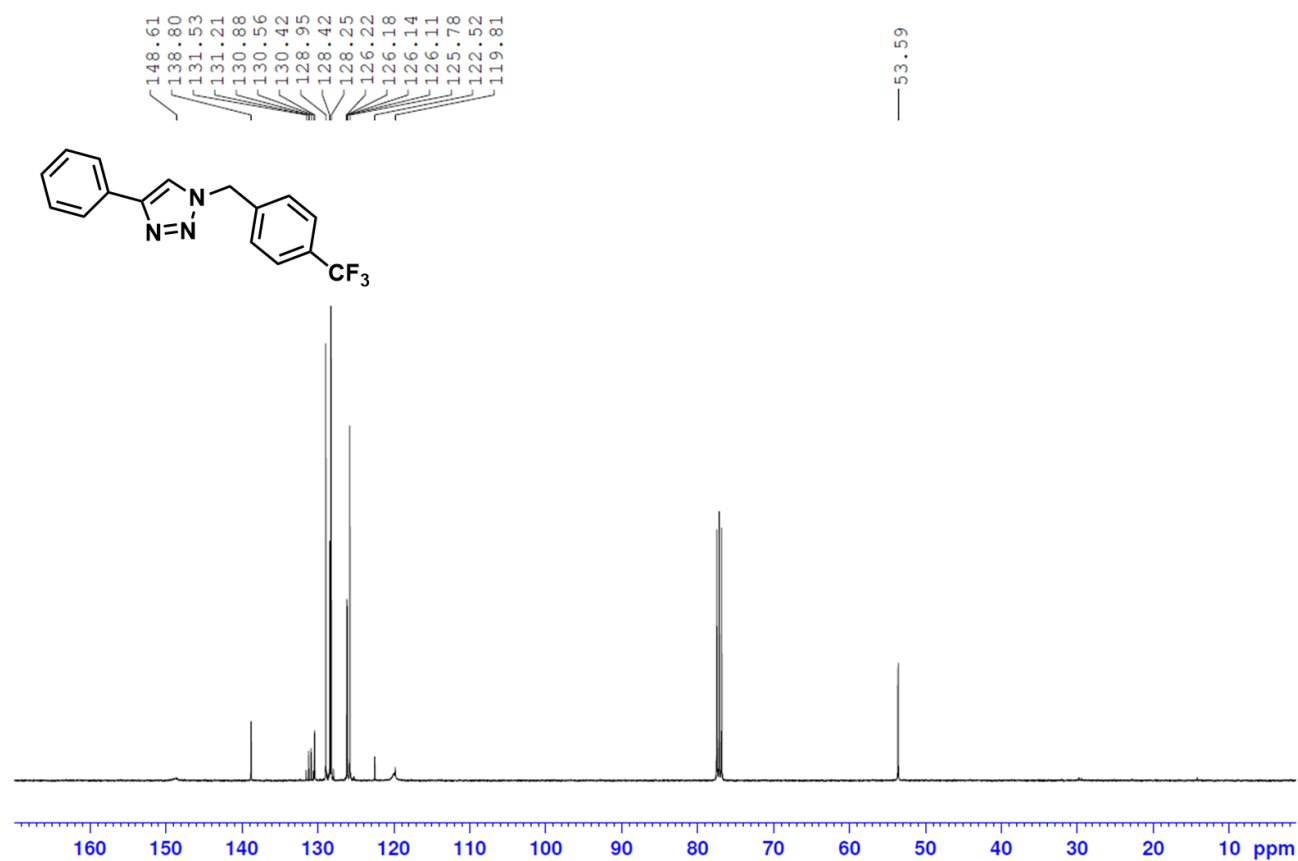

**<sup>1</sup>H NMR spectrum of *N*-propyl-2-(*p*-tolyl)-*N'*-tosylacetimidamide**

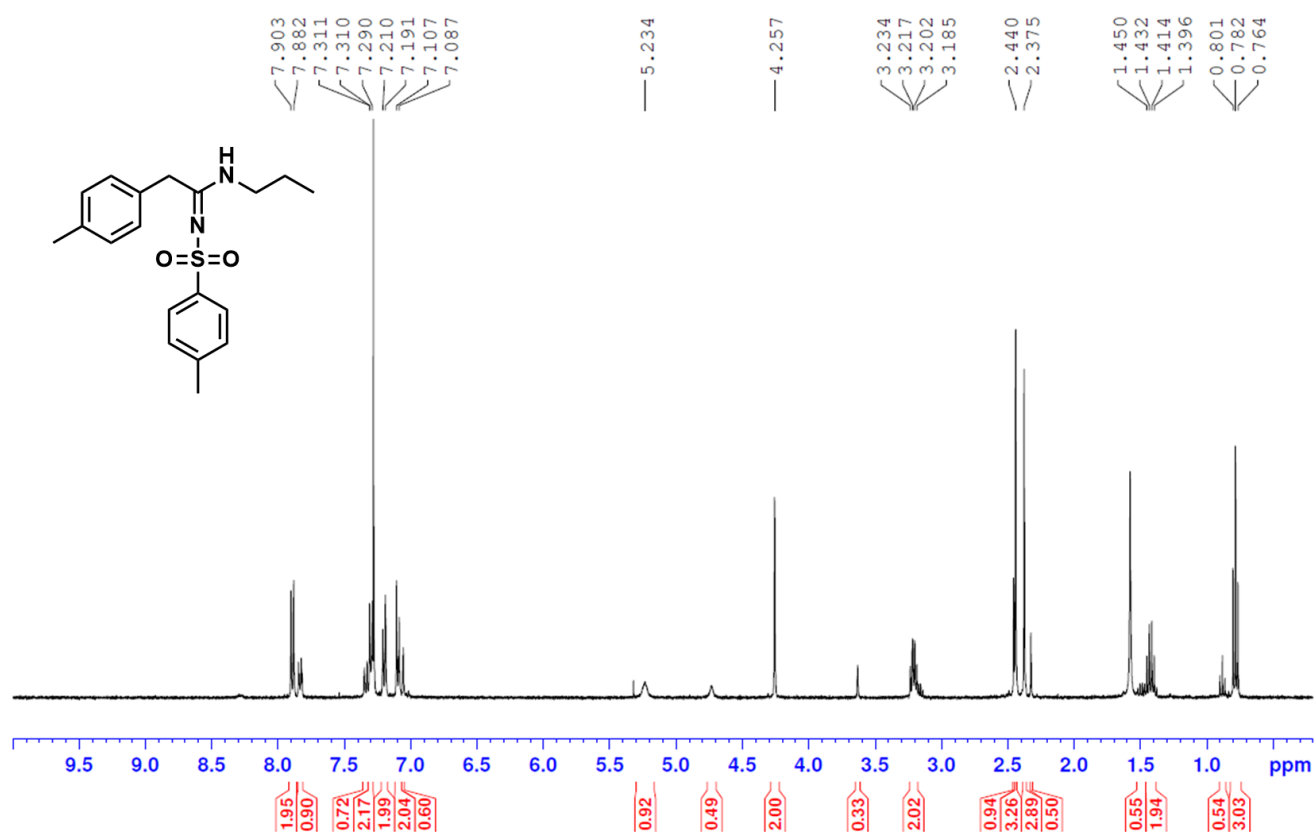

**<sup>13</sup>C NMR spectrum of *N*-propyl-2-(*p*-tolyl)-*N'*-tosylacetimidamide**

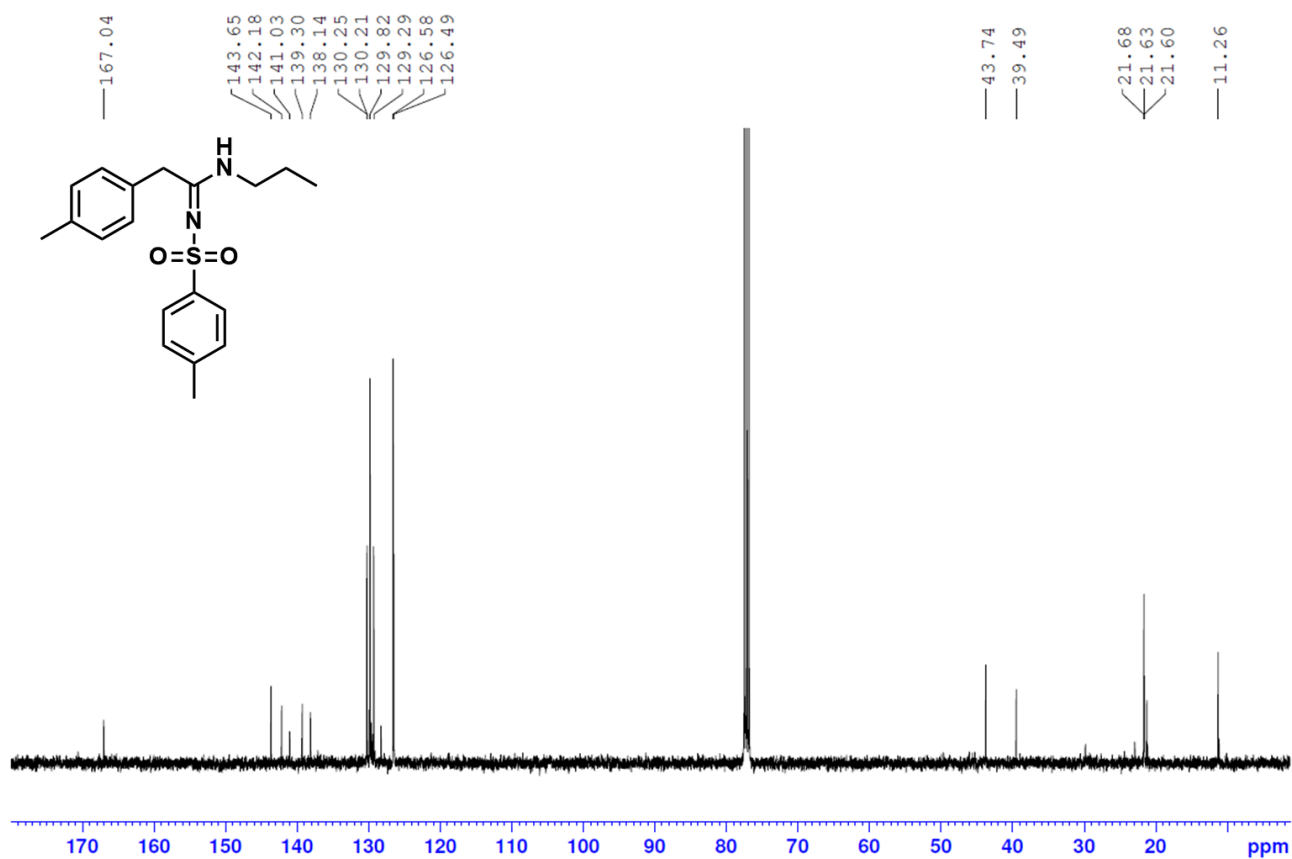

**<sup>1</sup>H NMR spectrum of *N*-isopropyl-2-phenyl-*N*-tosylacetimidamide**

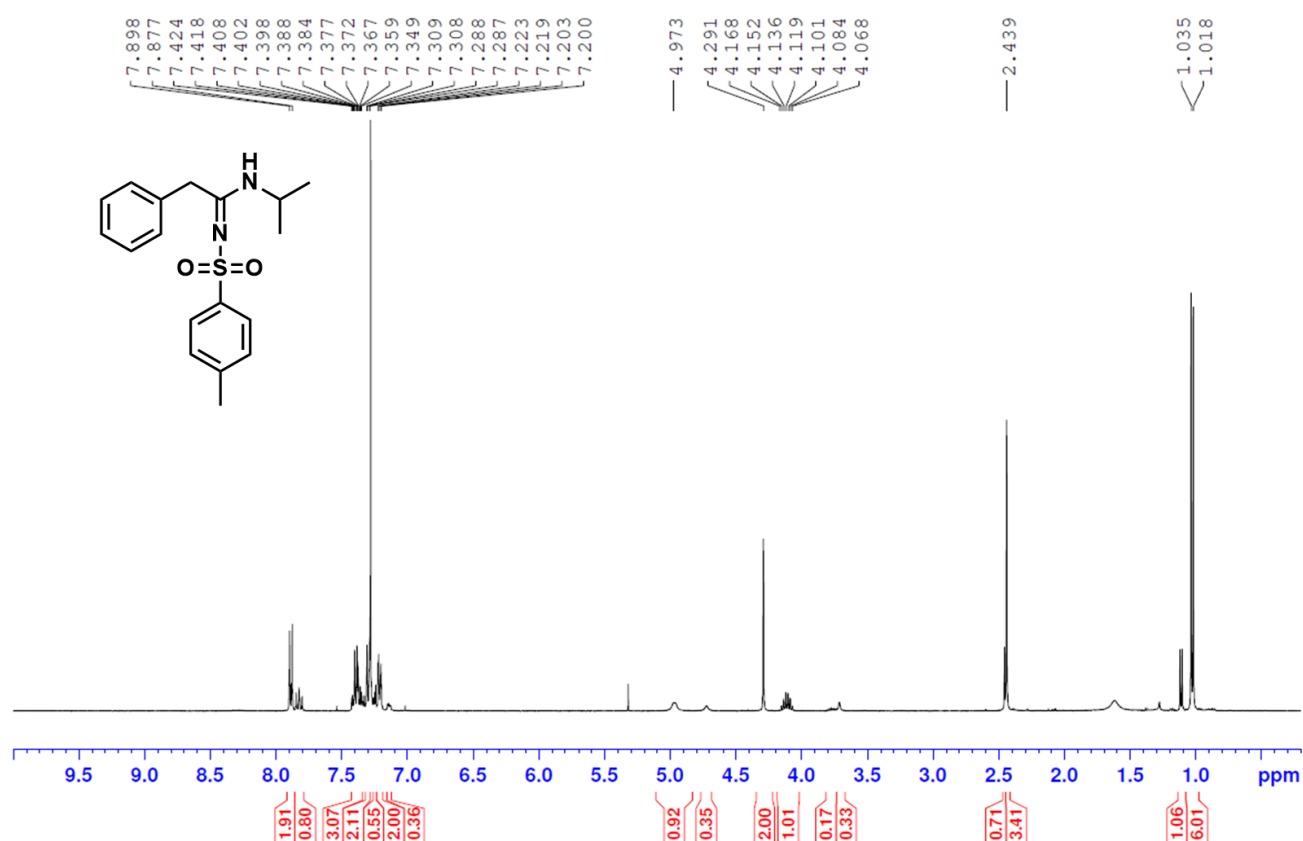

**<sup>13</sup>C NMR spectrum of *N*-isopropyl-2-phenyl-*N*-tosylacetimidamide**

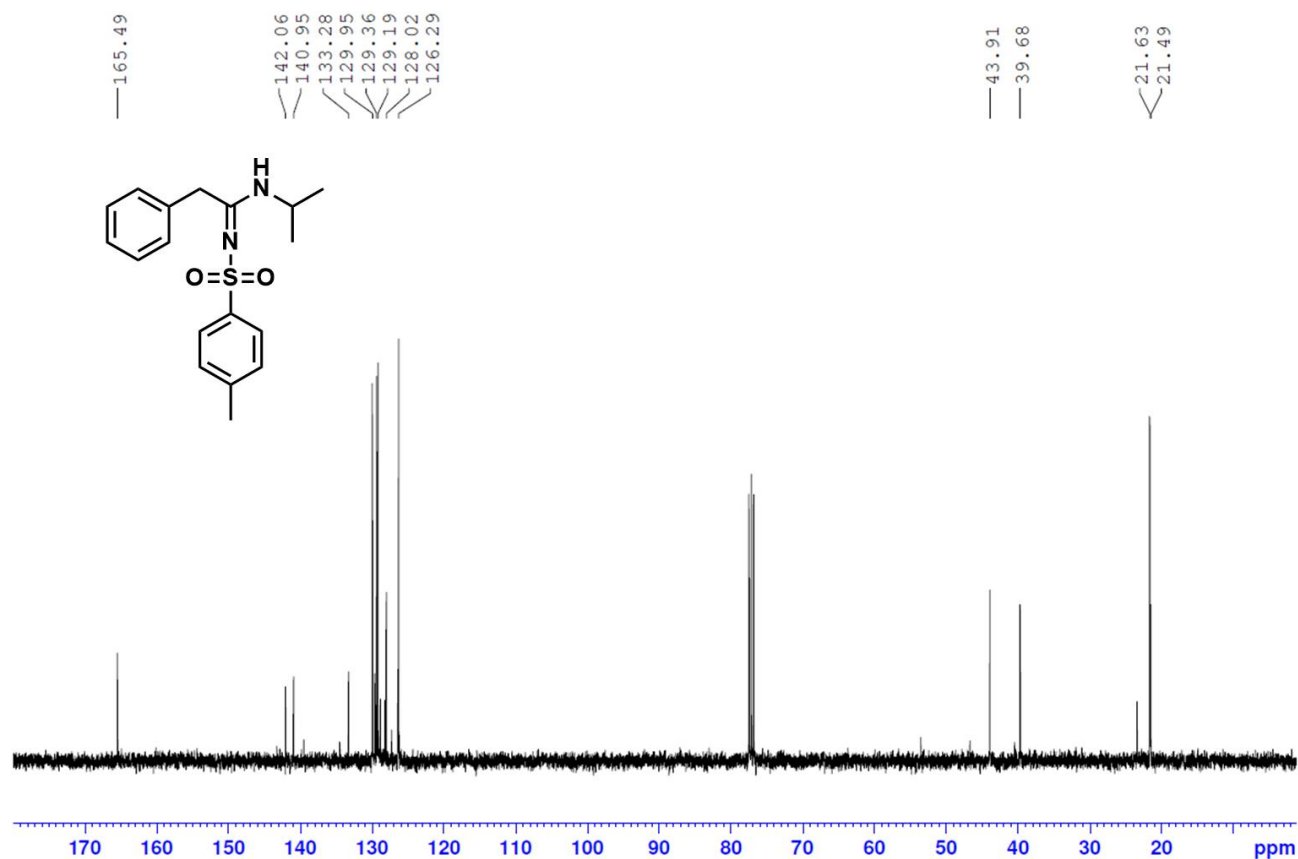

**<sup>1</sup>H NMR spectrum of *N*-propyl-*N*-tosyl-2-(4-(trifluoromethyl)phenyl)acetimidamide**

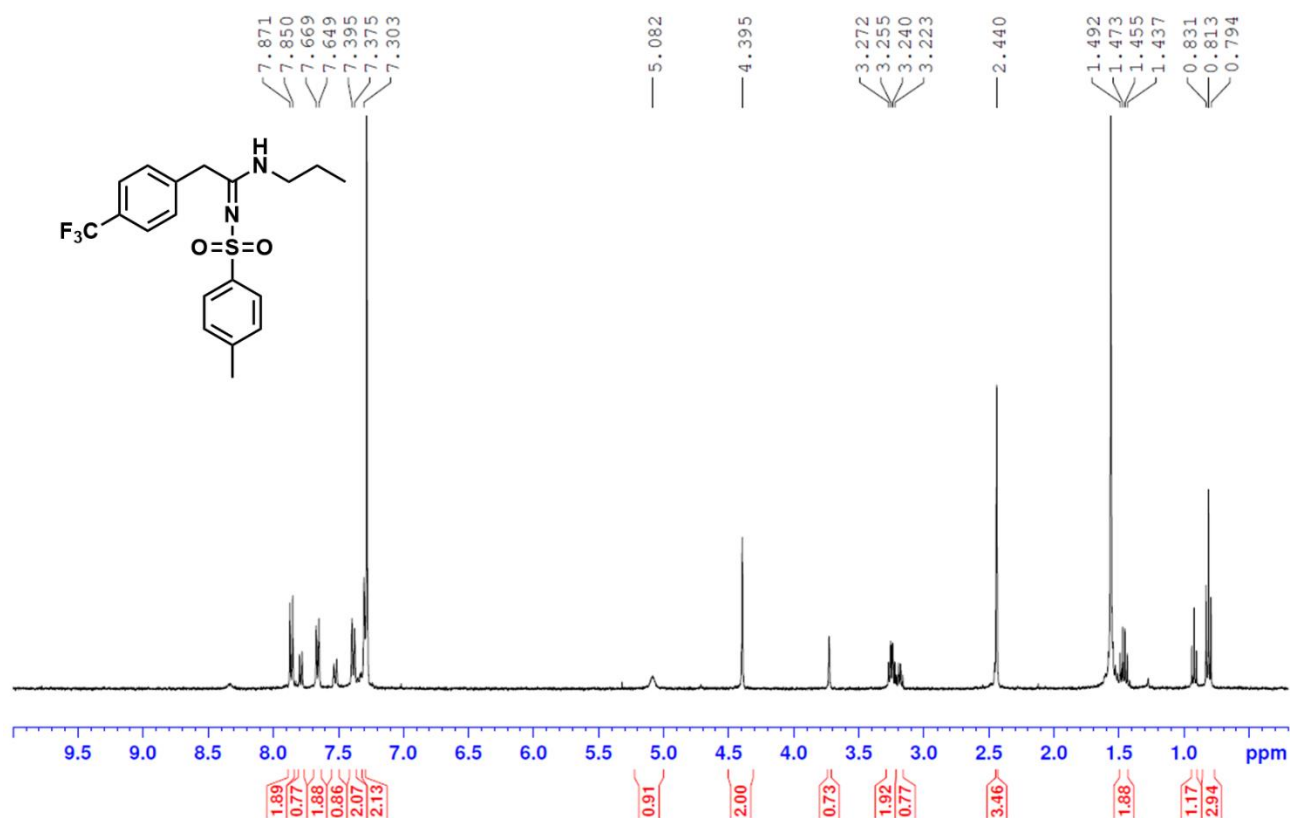

**<sup>13</sup>C NMR spectrum of *N*-propyl-*N*-tosyl-2-(4-(trifluoromethyl)phenyl)acetimidamide**

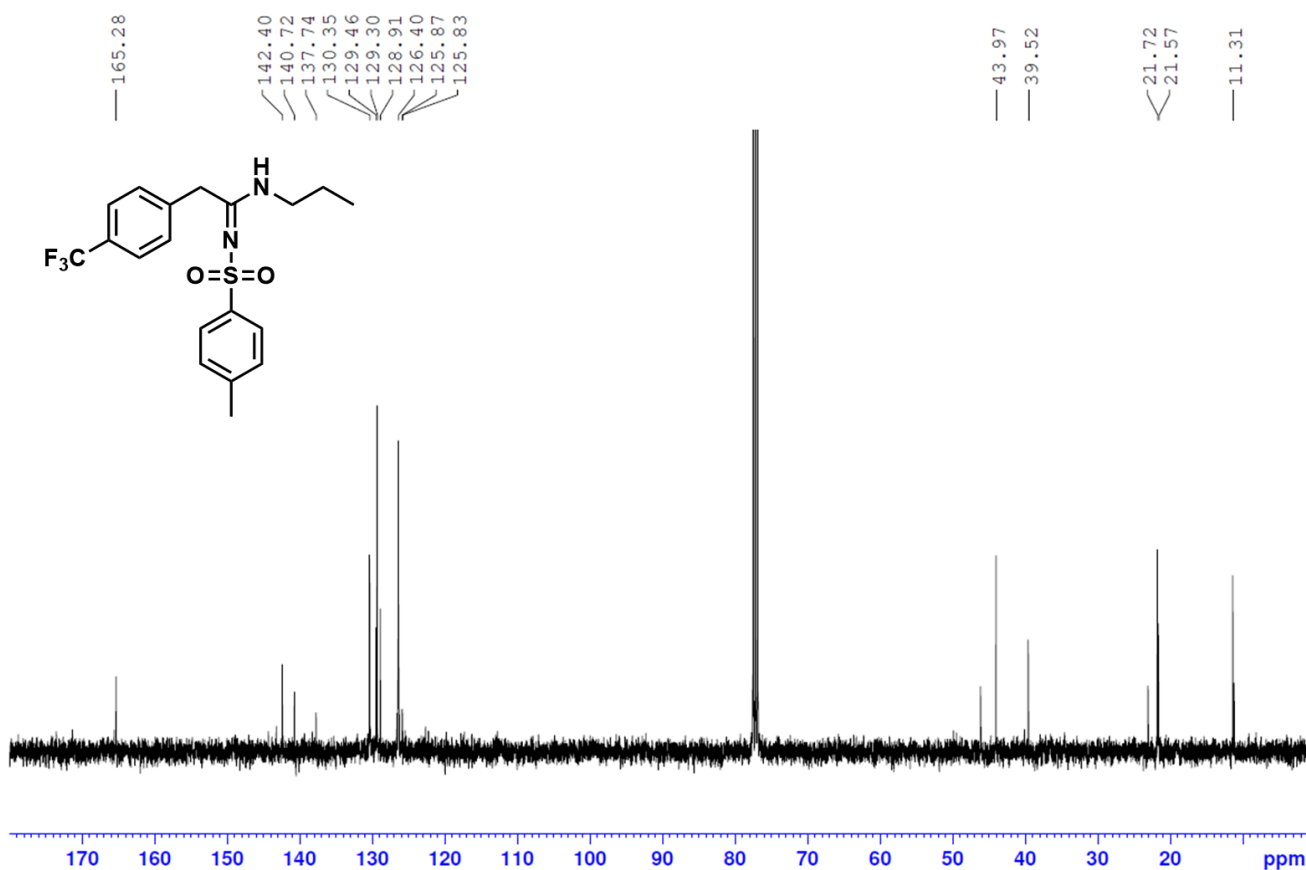

**<sup>1</sup>H NMR spectrum of *N*-(1-(*p*-tolyl)ethylidene)aniline**

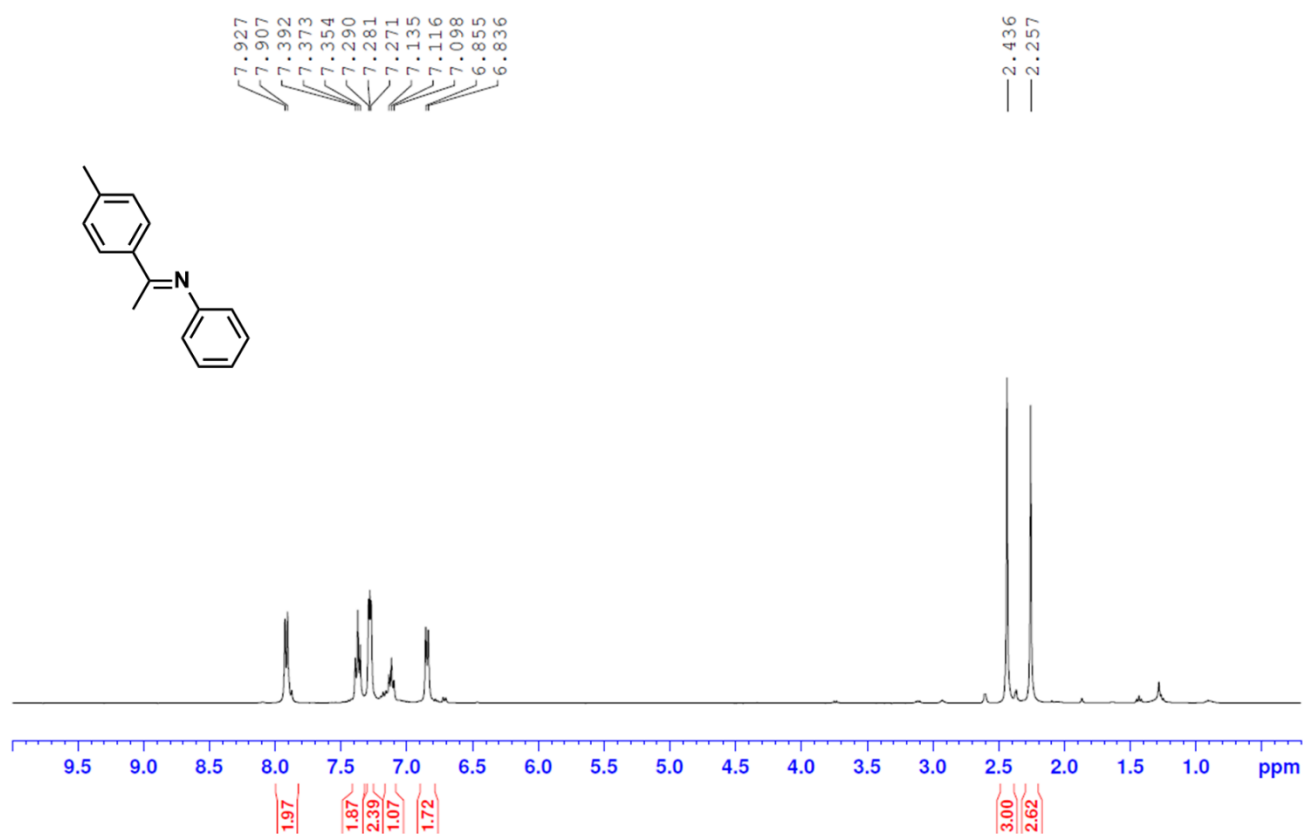

**<sup>13</sup>C NMR spectrum of *N*-(1-(*p*-tolyl)ethylidene)aniline**

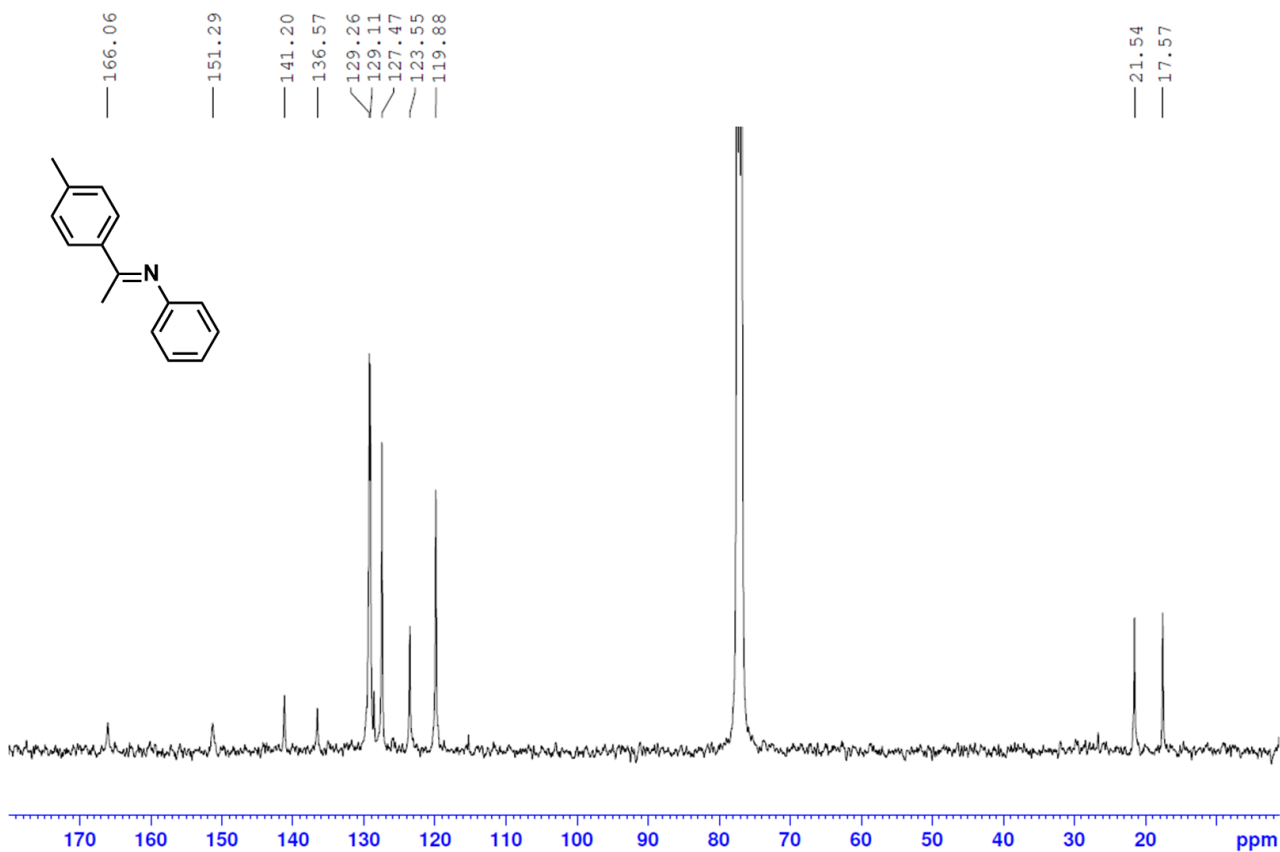

**<sup>1</sup>H NMR spectrum of *N*-(1-(4-(trifluoromethyl)phenyl)ethylidene)aniline**

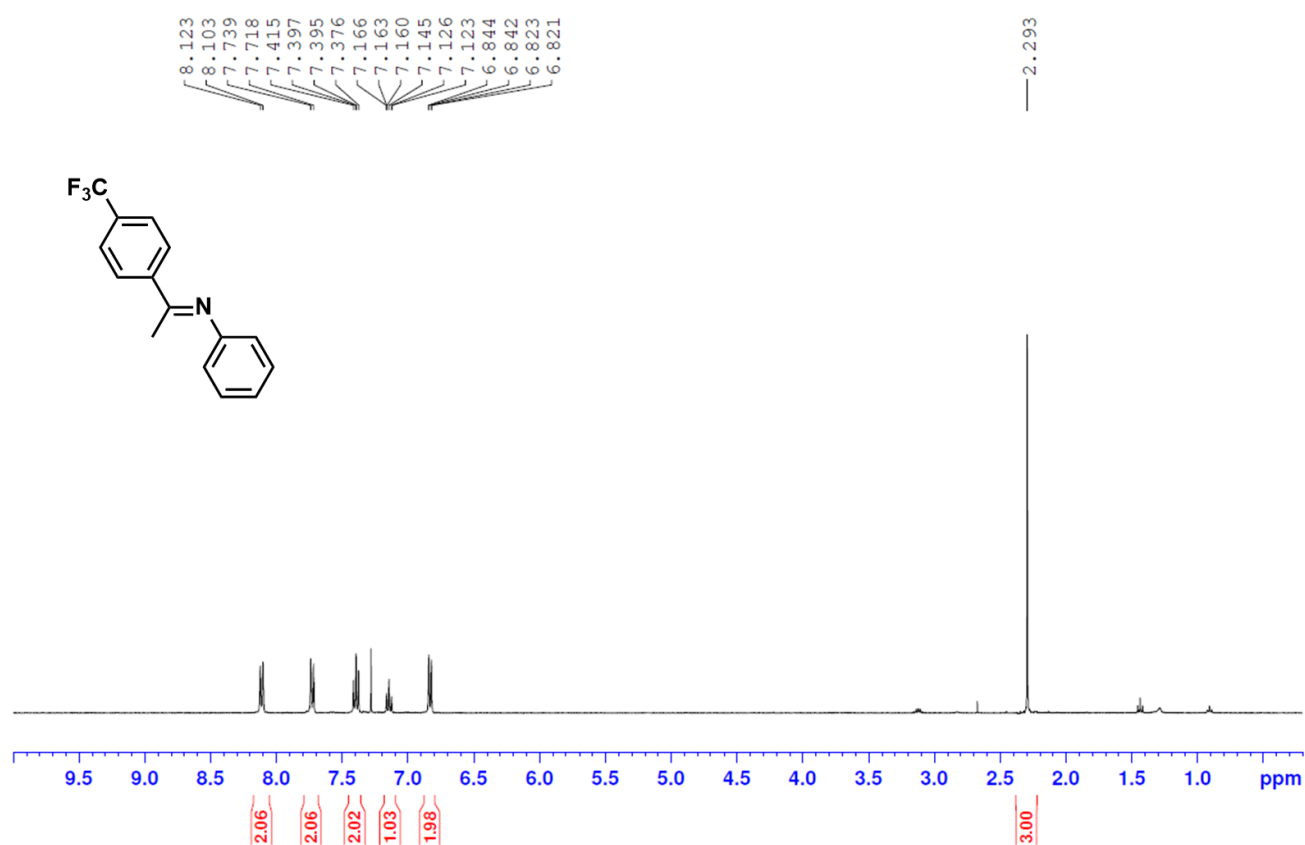

**<sup>13</sup>C NMR spectrum of *N*-(1-(4-(trifluoromethyl)phenyl)ethylidene)aniline**

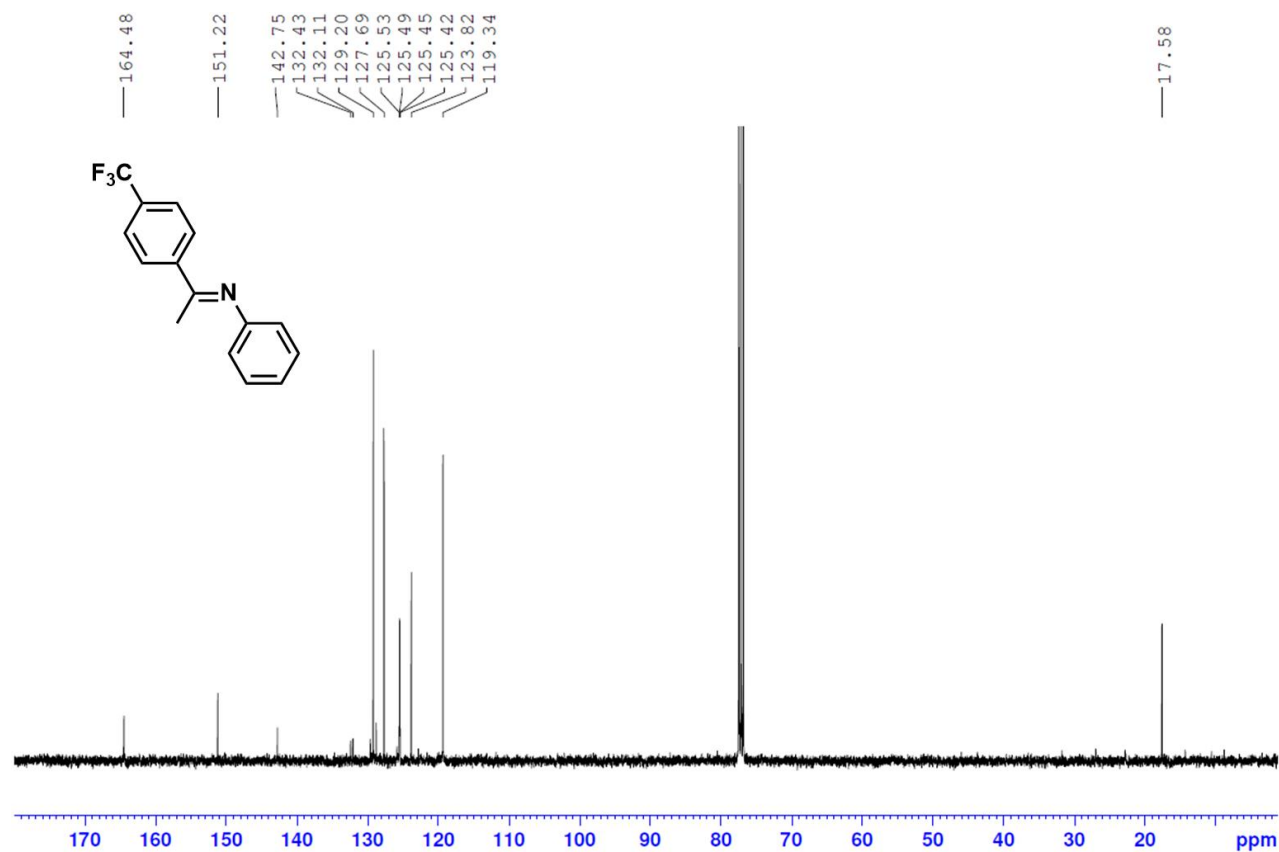

**<sup>1</sup>H NMR spectrum of *N*-(1-phenylethylidene)-4-(trifluoromethyl)aniline**

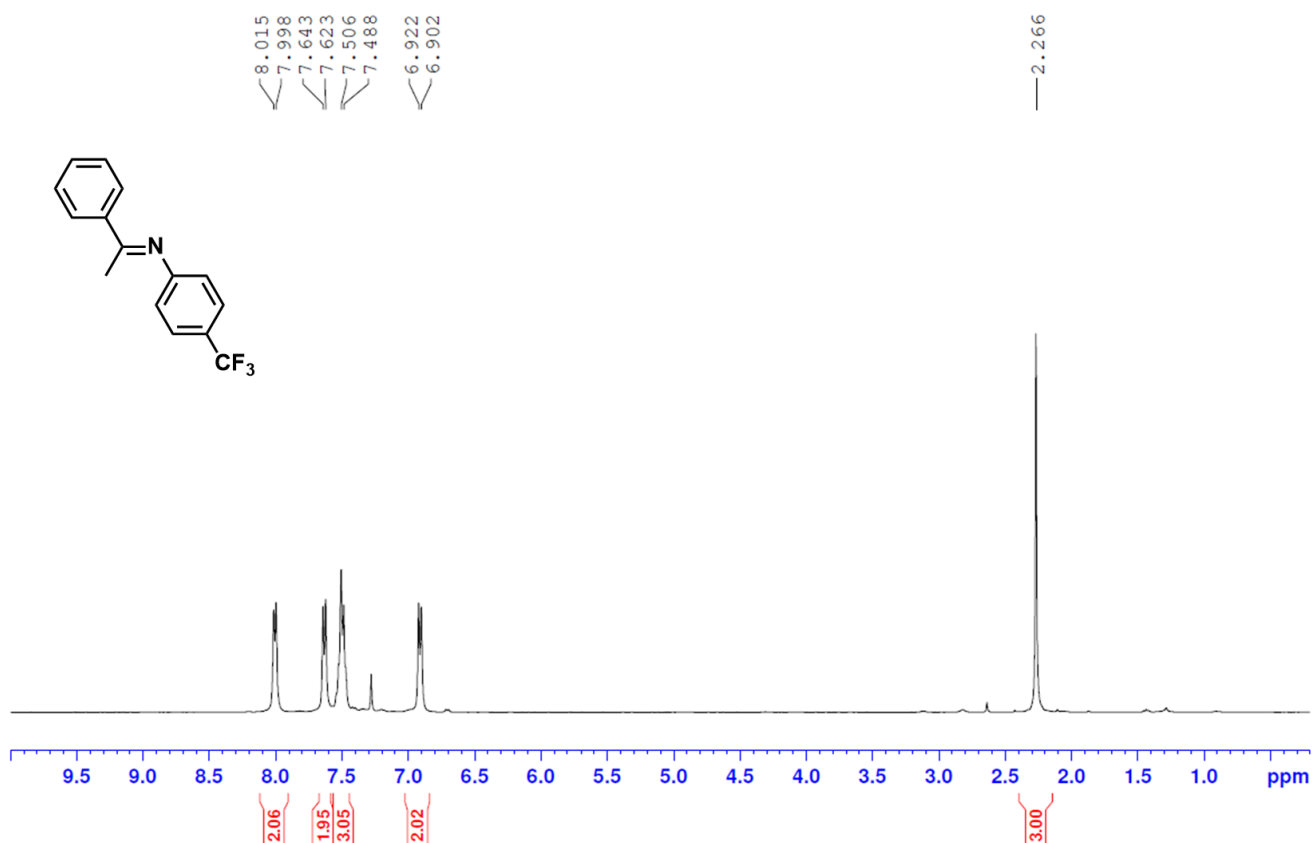

**<sup>13</sup>C NMR spectrum of *N*-(1-phenylethylidene)-4-(trifluoromethyl)aniline**

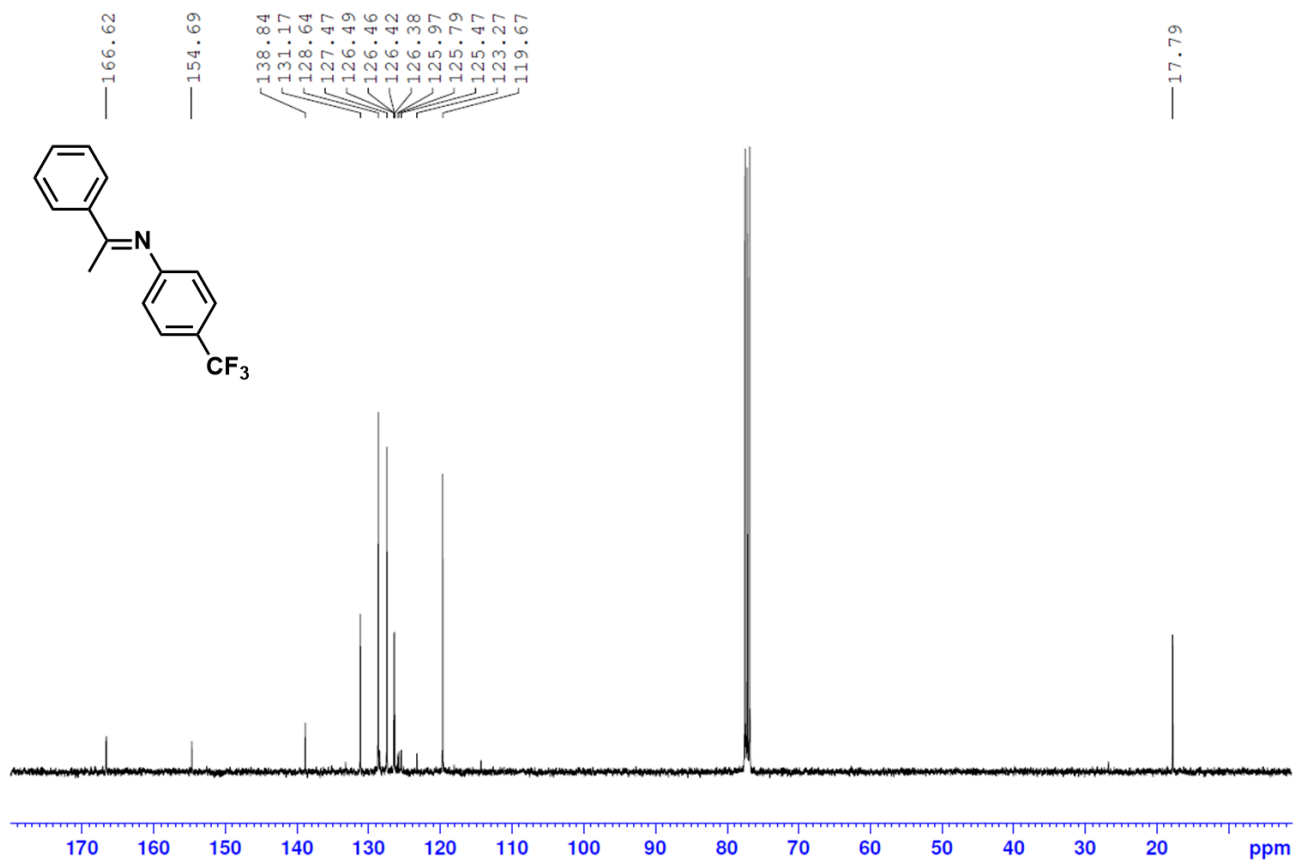



**<sup>1</sup>H NMR spectrum of 4-methyl-*N*-(1-phenylethylidene)aniline**

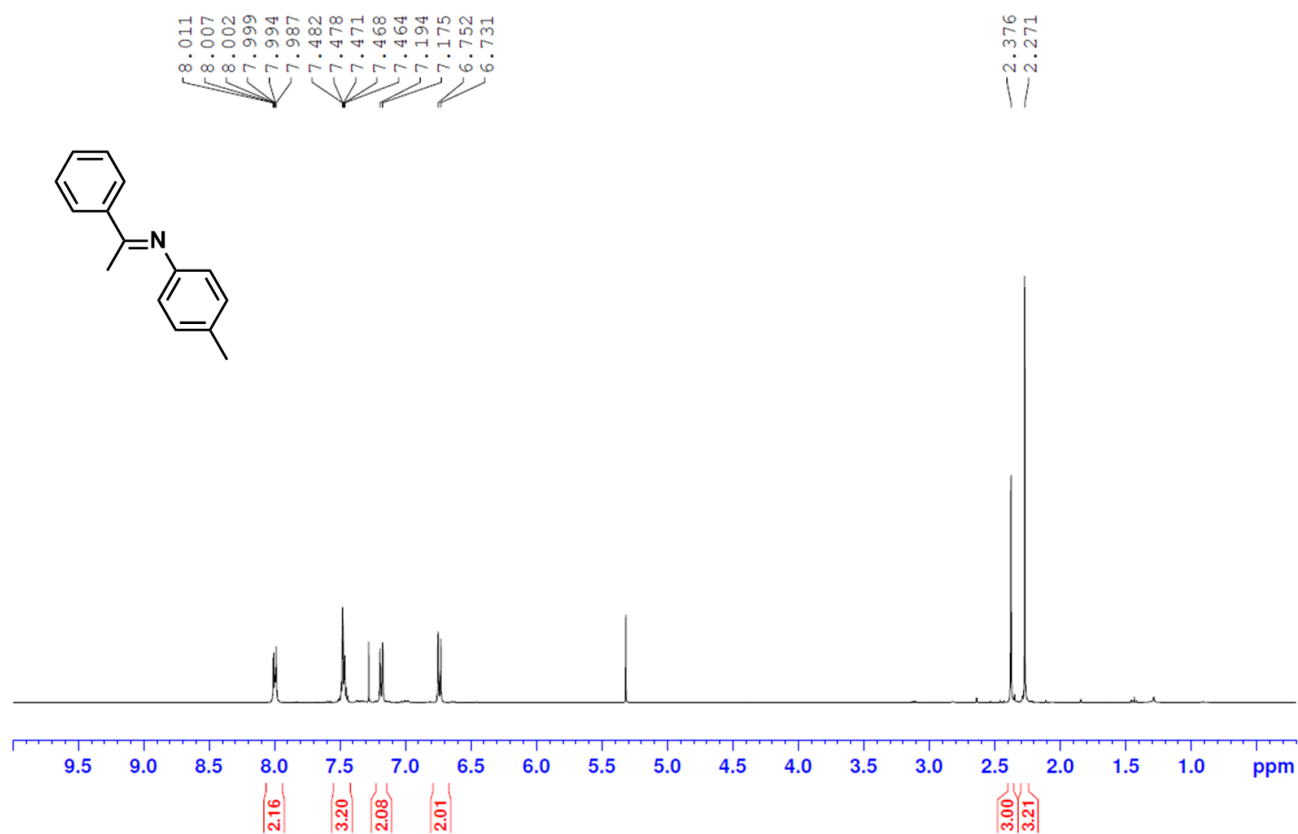

**<sup>13</sup>C NMR spectrum of 4-methyl-*N*-(1-phenylethylidene)aniline**

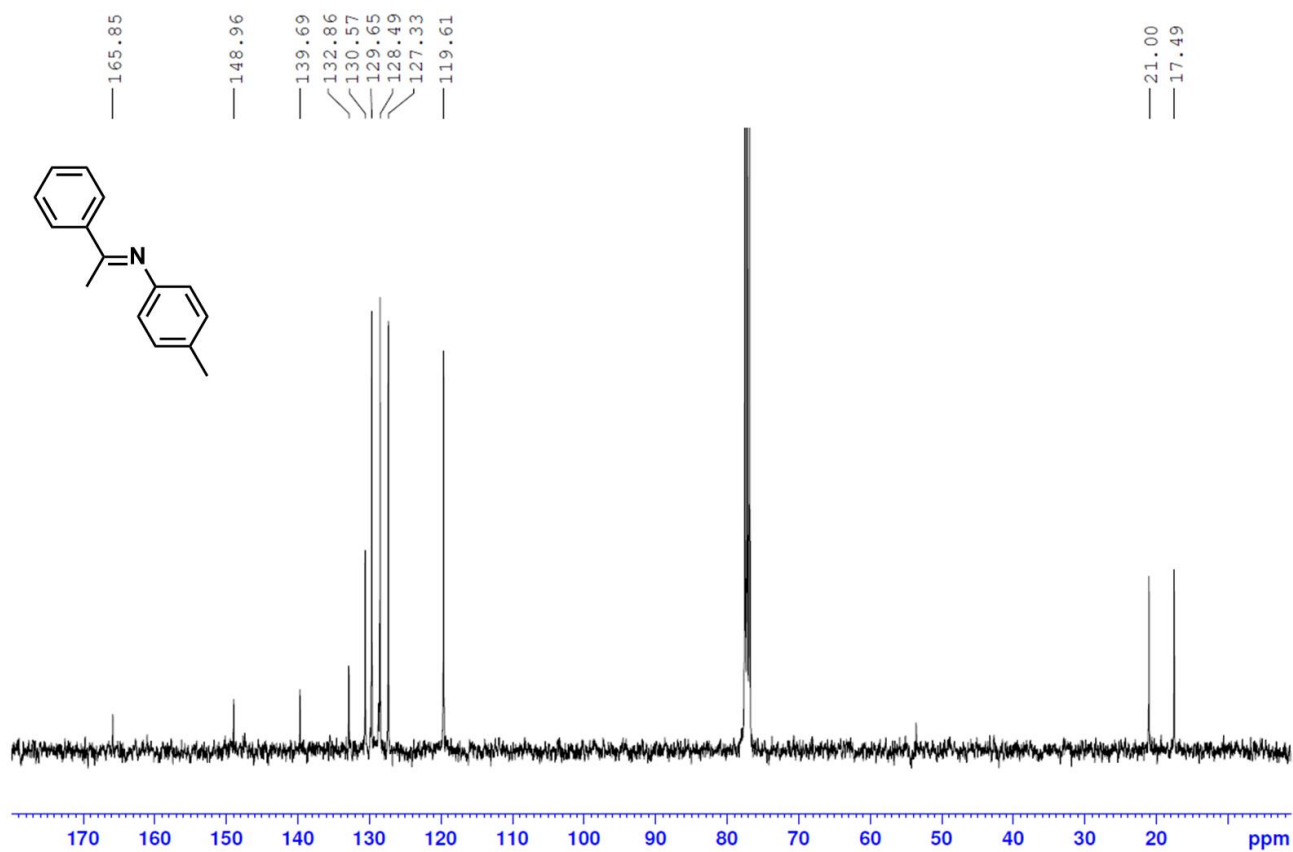

Supplement: Supplementary file 1 [file 31700804]
